# Supplementary material for: Assessment of chemistry knowledge in large language models that generate code
Source: Royal Society of Chemistry journal article supplement (doi:10.1039/d2dd00087c), 2023-01-01
Supplement: d2dd00087c1.csv [file d2dd00087c1.csv]

	name	result	temperature	engine	language	context	topic	type	natlang	used_context	model
0	aa_polarity	0	0.05	incoder/facebook/incoder-1B	python	none	bio	code	en	none	incoder-1B
1	aa_polarity	0	0.05	incoder/facebook/incoder-1B	python	none	bio	code	en	none	incoder-1B
2	aa_polarity	0	0.05	incoder/facebook/incoder-1B	python	none	bio	code	en	none	incoder-1B
3	aa_polarity	0	0.05	incoder/facebook/incoder-1B	python	none	bio	code	en	none	incoder-1B
4	aa_polarity	0	0.05	incoder/facebook/incoder-1B	python	none	bio	code	en	none	incoder-1B
5	adiabatic_expansion	0	0.05	incoder/facebook/incoder-1B	python	none	thermo	code	en	none	incoder-1B
6	adiabatic_expansion	0	0.05	incoder/facebook/incoder-1B	python	none	thermo	code	en	none	incoder-1B
7	adiabatic_expansion	0	0.05	incoder/facebook/incoder-1B	python	none	thermo	code	en	none	incoder-1B
8	adiabatic_expansion	0	0.05	incoder/facebook/incoder-1B	python	none	thermo	code	en	none	incoder-1B
9	adiabatic_expansion	0	0.05	incoder/facebook/incoder-1B	python	none	thermo	code	en	none	incoder-1B
10	alignment	0	0.05	incoder/facebook/incoder-1B	python	none	md	code	en	none	incoder-1B
11	alignment	0	0.05	incoder/facebook/incoder-1B	python	none	md	code	en	none	incoder-1B
12	alignment	0	0.05	incoder/facebook/incoder-1B	python	none	md	code	en	none	incoder-1B
13	alignment	0	0.05	incoder/facebook/incoder-1B	python	none	md	code	en	none	incoder-1B
14	alignment	0	0.05	incoder/facebook/incoder-1B	python	none	md	code	en	none	incoder-1B
15	aromatic_aa	0	0.05	incoder/facebook/incoder-1B	python	none	bio	code	en	none	incoder-1B
16	aromatic_aa	0	0.05	incoder/facebook/incoder-1B	python	none	bio	code	en	none	incoder-1B
17	aromatic_aa	0	0.05	incoder/facebook/incoder-1B	python	none	bio	code	en	none	incoder-1B
18	aromatic_aa	0	0.05	incoder/facebook/incoder-1B	python	none	bio	code	en	none	incoder-1B
19	aromatic_aa	0	0.05	incoder/facebook/incoder-1B	python	none	bio	code	en	none	incoder-1B
20	arrhenius	0	0.05	incoder/facebook/incoder-1B	python	none	genchem	code	ch	none	incoder-1B
21	arrhenius	0	0.05	incoder/facebook/incoder-1B	python	none	thermo	code	ch	none	incoder-1B
22	arrhenius	0	0.05	incoder/facebook/incoder-1B	python	none	genchem	code	ch	none	incoder-1B
23	arrhenius	0	0.05	incoder/facebook/incoder-1B	python	none	thermo	code	ch	none	incoder-1B
24	arrhenius	0	0.05	incoder/facebook/incoder-1B	python	none	genchem	code	ch	none	incoder-1B
25	arrhenius	0	0.05	incoder/facebook/incoder-1B	python	none	thermo	code	ch	none	incoder-1B
26	arrhenius	0	0.05	incoder/facebook/incoder-1B	python	none	genchem	code	ch	none	incoder-1B
27	arrhenius	0	0.05	incoder/facebook/incoder-1B	python	none	thermo	code	ch	none	incoder-1B
28	arrhenius	0	0.05	incoder/facebook/incoder-1B	python	none	genchem	code	ch	none	incoder-1B
29	arrhenius	0	0.05	incoder/facebook/incoder-1B	python	none	thermo	code	ch	none	incoder-1B
30	bimolecular	0	0.05	incoder/facebook/incoder-1B	python	none	genchem	code	ch	none	incoder-1B
31	bimolecular	0	0.05	incoder/facebook/incoder-1B	python	none	genchem	code	ch	none	incoder-1B
32	bimolecular	0	0.05	incoder/facebook/incoder-1B	python	none	genchem	code	ch	none	incoder-1B
33	bimolecular	0	0.05	incoder/facebook/incoder-1B	python	none	genchem	code	ch	none	incoder-1B
34	bimolecular	0	0.05	incoder/facebook/incoder-1B	python	none	genchem	code	ch	none	incoder-1B
35	bb_rad	0	0.05	incoder/facebook/incoder-1B	python	none	spectroscopy	code	en	none	incoder-1B
36	bb_rad	0	0.05	incoder/facebook/incoder-1B	python	none	spectroscopy	code	en	none	incoder-1B
37	bb_rad	0	0.05	incoder/facebook/incoder-1B	python	none	spectroscopy	code	en	none	incoder-1B
38	bb_rad	0	0.05	incoder/facebook/incoder-1B	python	none	spectroscopy	code	en	none	incoder-1B
39	bb_rad	0	0.05	incoder/facebook/incoder-1B	python	none	spectroscopy	code	en	none	incoder-1B
40	blast	0	0.05	incoder/facebook/incoder-1B	python	none	bio	code	en	none	incoder-1B
41	blast	0	0.05	incoder/facebook/incoder-1B	python	none	bio	code	en	none	incoder-1B
42	blast	0	0.05	incoder/facebook/incoder-1B	python	none	bio	code	en	none	incoder-1B
43	blast	0	0.05	incoder/facebook/incoder-1B	python	none	bio	code	en	none	incoder-1B
44	blast	0	0.05	incoder/facebook/incoder-1B	python	none	bio	code	en	none	incoder-1B
45	braggant	0	0.05	incoder/facebook/incoder-1B	python	none	spectroscopy	code	en	none	incoder-1B
46	braggant	0	0.05	incoder/facebook/incoder-1B	python	none	spectroscopy	code	en	none	incoder-1B
47	braggant	0	0.05	incoder/facebook/incoder-1B	python	none	spectroscopy	code	en	none	incoder-1B
48	braggant	0	0.05	incoder/facebook/incoder-1B	python	none	spectroscopy	code	en	none	incoder-1B
49	braggant	0	0.05	incoder/facebook/incoder-1B	python	none	spectroscopy	code	en	none	incoder-1B
50	bravais	0	0.05	incoder/facebook/incoder-1B	python	none	spectroscopy	code	en	none	incoder-1B
51	bravais	0	0.05	incoder/facebook/incoder-1B	python	none	spectroscopy	code	en	none	incoder-1B
52	bravais	0	0.05	incoder/facebook/incoder-1B	python	none	spectroscopy	code	en	none	incoder-1B
53	bravais	0	0.05	incoder/facebook/incoder-1B	python	none	spectroscopy	code	en	none	incoder-1B
54	bravais	0	0.05	incoder/facebook/incoder-1B	python	none	spectroscopy	code	en	none	incoder-1B
55	canonicalize	0	0.05	incoder/facebook/incoder-1B	python	none	cheminf	code	ch	none	incoder-1B
56	canonicalize	0	0.05	incoder/facebook/incoder-1B	python	none	cheminf	code	ch	none	incoder-1B
57	canonicalize	0	0.05	incoder/facebook/incoder-1B	python	none	cheminf	code	ch	none	incoder-1B
58	canonicalize	0	0.05	incoder/facebook/incoder-1B	python	none	cheminf	code	ch	none	incoder-1B
59	canonicalize	0	0.05	incoder/facebook/incoder-1B	python	none	cheminf	code	ch	none	incoder-1B
60	carnot_efficiency	0	0.05	incoder/facebook/incoder-1B	python	none	thermo	code	en	none	incoder-1B
61	carnot_efficiency	0	0.05	incoder/facebook/incoder-1B	python	none	thermo	code	en	none	incoder-1B
62	carnot_efficiency	0	0.05	incoder/facebook/incoder-1B	python	none	thermo	code	en	none	incoder-1B
63	carnot_efficiency	0	0.05	incoder/facebook/incoder-1B	python	none	thermo	code	en	none	incoder-1B
64	carnot_efficiency	0	0.05	incoder/facebook/incoder-1B	python	none	thermo	code	en	none	incoder-1B
65	claussius	0	0.05	incoder/facebook/incoder-1B	python	none	thermo	code	en	none	incoder-1B
66	claussius	0	0.05	incoder/facebook/incoder-1B	python	none	thermo	code	en	none	incoder-1B
67	claussius	0	0.05	incoder/facebook/incoder-1B	python	none	thermo	code	en	none	incoder-1B
68	claussius	0	0.05	incoder/facebook/incoder-1B	python	none	thermo	code	en	none	incoder-1B
69	claussius	0	0.05	incoder/facebook/incoder-1B	python	none	thermo	code	en	none	incoder-1B
70	compare_electronegativity	0	0.05	incoder/facebook/incoder-1B	python	none	genchem	code	ch	none	incoder-1B
71	compare_electronegativity	0	0.05	incoder/facebook/incoder-1B	python	none	genchem	code	ch	none	incoder-1B
72	compare_electronegativity	0	0.05	incoder/facebook/incoder-1B	python	none	genchem	code	ch	none	incoder-1B
73	compare_electronegativity	0	0.05	incoder/facebook/incoder-1B	python	none	genchem	code	ch	none	incoder-1B
74	compare_electronegativity	0	0.05	incoder/facebook/incoder-1B	python	none	genchem	code	ch	none	incoder-1B
75	descriptors	0	0.05	incoder/facebook/incoder-1B	python	none	cheminf	code	ch	none	incoder-1B
76	descriptors	0	0.05	incoder/facebook/incoder-1B	python	none	cheminf	code	ch	none	incoder-1B
77	descriptors	0	0.05	incoder/facebook/incoder-1B	python	none	cheminf	code	ch	none	incoder-1B
78	descriptors	0	0.05	incoder/facebook/incoder-1B	python	none	cheminf	code	ch	none	incoder-1B
79	descriptors	0	0.05	incoder/facebook/incoder-1B	python	none	cheminf	code	ch	none	incoder-1B
80	de_broglie	0	0.05	incoder/facebook/incoder-1B	python	none	qm	code	ch	none	incoder-1B
81	de_broglie	0	0.05	incoder/facebook/incoder-1B	python	none	genchem	code	ch	none	incoder-1B
82	de_broglie	0	0.05	incoder/facebook/incoder-1B	python	none	qm	code	ch	none	incoder-1B
83	de_broglie	0	0.05	incoder/facebook/incoder-1B	python	none	genchem	code	ch	none	incoder-1B
84	de_broglie	0	0.05	incoder/facebook/incoder-1B	python	none	qm	code	ch	none	incoder-1B
85	de_broglie	0	0.05	incoder/facebook/incoder-1B	python	none	genchem	code	ch	none	incoder-1B
86	de_broglie	0	0.05	incoder/facebook/incoder-1B	python	none	qm	code	ch	none	incoder-1B
87	de_broglie	0	0.05	incoder/facebook/incoder-1B	python	none	genchem	code	ch	none	incoder-1B
88	de_broglie	0	0.05	incoder/facebook/incoder-1B	python	none	qm	code	ch	none	incoder-1B
89	de_broglie	0	0.05	incoder/facebook/incoder-1B	python	none	genchem	code	ch	none	incoder-1B
90	dipole	0	0.05	incoder/facebook/incoder-1B	python	none	genchem	code	ch	none	incoder-1B
91	dipole	0	0.05	incoder/facebook/incoder-1B	python	none	genchem	code	ch	none	incoder-1B
92	dipole	0	0.05	incoder/facebook/incoder-1B	python	none	genchem	code	ch	none	incoder-1B
93	dipole	0	0.05	incoder/facebook/incoder-1B	python	none	genchem	code	ch	none	incoder-1B
94	dipole	0	0.05	incoder/facebook/incoder-1B	python	none	genchem	code	ch	none	incoder-1B
95	dou	0	0.05	incoder/facebook/incoder-1B	python	none	spectroscopy	code	en	none	incoder-1B
96	dou	0	0.05	incoder/facebook/incoder-1B	python	none	spectroscopy	code	en	none	incoder-1B
97	dou	1	0.05	incoder/facebook/incoder-1B	python	none	spectroscopy	code	en	none	incoder-1B
98	dou	0	0.05	incoder/facebook/incoder-1B	python	none	spectroscopy	code	en	none	incoder-1B
99	dou	1	0.05	incoder/facebook/incoder-1B	python	none	spectroscopy	code	en	none	incoder-1B
100	element_mass	0	0.05	incoder/facebook/incoder-1B	python	none	genchem	code	ch	none	incoder-1B
101	element_mass	0	0.05	incoder/facebook/incoder-1B	python	none	genchem	code	ch	none	incoder-1B
102	element_mass	0	0.05	incoder/facebook/incoder-1B	python	none	genchem	code	ch	none	incoder-1B
103	element_mass	0	0.05	incoder/facebook/incoder-1B	python	none	genchem	code	ch	none	incoder-1B
104	element_mass	0	0.05	incoder/facebook/incoder-1B	python	none	genchem	code	ch	none	incoder-1B
105	element_name	0	0.05	incoder/facebook/incoder-1B	python	none	genchem	code	ch	none	incoder-1B
106	element_name	0	0.05	incoder/facebook/incoder-1B	python	none	genchem	code	ch	none	incoder-1B
107	element_name	0	0.05	incoder/facebook/incoder-1B	python	none	genchem	code	ch	none	incoder-1B
108	element_name	0	0.05	incoder/facebook/incoder-1B	python	none	genchem	code	ch	none	incoder-1B
109	element_name	0	0.05	incoder/facebook/incoder-1B	python	none	genchem	code	ch	none	incoder-1B
110	energy_of_e	0	0.05	incoder/facebook/incoder-1B	python	none	qm	code	en	none	incoder-1B
111	energy_of_e	0	0.05	incoder/facebook/incoder-1B	python	none	qm	code	en	none	incoder-1B
112	energy_of_e	0	0.05	incoder/facebook/incoder-1B	python	none	qm	code	en	none	incoder-1B
113	energy_of_e	0	0.05	incoder/facebook/incoder-1B	python	none	qm	code	en	none	incoder-1B
114	energy_of_e	0	0.05	incoder/facebook/incoder-1B	python	none	qm	code	en	none	incoder-1B
115	find_indices	0	0.05	incoder/facebook/incoder-1B	python	none	md	code	en	none	incoder-1B
116	find_indices	0	0.05	incoder/facebook/incoder-1B	python	none	md	code	en	none	incoder-1B
117	find_indices	0	0.05	incoder/facebook/incoder-1B	python	none	md	code	en	none	incoder-1B
118	find_indices	0	0.05	incoder/facebook/incoder-1B	python	none	md	code	en	none	incoder-1B
119	find_indices	0	0.05	incoder/facebook/incoder-1B	python	none	md	code	en	none	incoder-1B
120	force_constant	0	0.05	incoder/facebook/incoder-1B	python	none	spectroscopy	code	en	none	incoder-1B
121	force_constant	0	0.05	incoder/facebook/incoder-1B	python	none	spectroscopy	code	en	none	incoder-1B
122	force_constant	0	0.05	incoder/facebook/incoder-1B	python	none	spectroscopy	code	en	none	incoder-1B
123	force_constant	0	0.05	incoder/facebook/incoder-1B	python	none	spectroscopy	code	en	none	incoder-1B
124	force_constant	0	0.05	incoder/facebook/incoder-1B	python	none	spectroscopy	code	en	none	incoder-1B
125	freezing_depression	0	0.05	incoder/facebook/incoder-1B	python	none	genchem	code	ch	none	incoder-1B
126	freezing_depression	0	0.05	incoder/facebook/incoder-1B	python	none	genchem	code	ch	none	incoder-1B
127	freezing_depression	0	0.05	incoder/facebook/incoder-1B	python	none	genchem	code	ch	none	incoder-1B
128	freezing_depression	0	0.05	incoder/facebook/incoder-1B	python	none	genchem	code	ch	none	incoder-1B
129	freezing_depression	0	0.05	incoder/facebook/incoder-1B	python	none	genchem	code	ch	none	incoder-1B
130	gaussian_input_emin	1	0.05	incoder/facebook/incoder-1B	python	none	qm	human	en	none	incoder-1B
131	gaussian_input_emin	1	0.05	incoder/facebook/incoder-1B	python	none	qm	human	en	none	incoder-1B
132	gaussian_input_emin	1	0.05	incoder/facebook/incoder-1B	python	none	qm	human	en	none	incoder-1B
133	gaussian_input_emin	1	0.05	incoder/facebook/incoder-1B	python	none	qm	human	en	none	incoder-1B
134	gaussian_input_emin	1	0.05	incoder/facebook/incoder-1B	python	none	qm	human	en	none	incoder-1B
135	genpos	0	0.05	incoder/facebook/incoder-1B	python	none	spectroscopy	code	en	none	incoder-1B
136	genpos	0	0.05	incoder/facebook/incoder-1B	python	none	spectroscopy	code	en	none	incoder-1B
137	genpos	0	0.05	incoder/facebook/incoder-1B	python	none	spectroscopy	code	en	none	incoder-1B
138	genpos	0	0.05	incoder/facebook/incoder-1B	python	none	spectroscopy	code	en	none	incoder-1B
139	genpos	0	0.05	incoder/facebook/incoder-1B	python	none	spectroscopy	code	en	none	incoder-1B
140	heating_water	0	0.05	incoder/facebook/incoder-1B	python	none	thermo	code	en	none	incoder-1B
141	heating_water	0	0.05	incoder/facebook/incoder-1B	python	none	thermo	code	en	none	incoder-1B
142	heating_water	0	0.05	incoder/facebook/incoder-1B	python	none	thermo	code	en	none	incoder-1B
143	heating_water	0	0.05	incoder/facebook/incoder-1B	python	none	thermo	code	en	none	incoder-1B
144	heating_water	0	0.05	incoder/facebook/incoder-1B	python	none	thermo	code	en	none	incoder-1B
145	hydrophobic_res	0	0.05	incoder/facebook/incoder-1B	python	none	bio	code	en	none	incoder-1B
146	hydrophobic_res	0	0.05	incoder/facebook/incoder-1B	python	none	bio	code	en	none	incoder-1B
147	hydrophobic_res	0	0.05	incoder/facebook/incoder-1B	python	none	bio	code	en	none	incoder-1B
148	hydrophobic_res	0	0.05	incoder/facebook/incoder-1B	python	none	bio	code	en	none	incoder-1B
149	hydrophobic_res	0	0.05	incoder/facebook/incoder-1B	python	none	bio	code	en	none	incoder-1B
150	ideal_gas	0	0.05	incoder/facebook/incoder-1B	python	none	genchem	code	ch	none	incoder-1B
151	ideal_gas	0	0.05	incoder/facebook/incoder-1B	python	none	thermo	code	ch	none	incoder-1B
152	ideal_gas	0	0.05	incoder/facebook/incoder-1B	python	none	genchem	code	ch	none	incoder-1B
153	ideal_gas	0	0.05	incoder/facebook/incoder-1B	python	none	thermo	code	ch	none	incoder-1B
154	ideal_gas	0	0.05	incoder/facebook/incoder-1B	python	none	genchem	code	ch	none	incoder-1B
155	ideal_gas	0	0.05	incoder/facebook/incoder-1B	python	none	thermo	code	ch	none	incoder-1B
156	ideal_gas	0	0.05	incoder/facebook/incoder-1B	python	none	genchem	code	ch	none	incoder-1B
157	ideal_gas	0	0.05	incoder/facebook/incoder-1B	python	none	thermo	code	ch	none	incoder-1B
158	ideal_gas	0	0.05	incoder/facebook/incoder-1B	python	none	genchem	code	ch	none	incoder-1B
159	ideal_gas	0	0.05	incoder/facebook/incoder-1B	python	none	thermo	code	ch	none	incoder-1B
160	iupac2smiles	0	0.05	incoder/facebook/incoder-1B	python	none	cheminf	code	ch	none	incoder-1B
161	iupac2smiles	0	0.05	incoder/facebook/incoder-1B	python	none	cheminf	code	ch	none	incoder-1B
162	iupac2smiles	0	0.05	incoder/facebook/incoder-1B	python	none	cheminf	code	ch	none	incoder-1B
163	iupac2smiles	0	0.05	incoder/facebook/incoder-1B	python	none	cheminf	code	ch	none	incoder-1B
164	iupac2smiles	0	0.05	incoder/facebook/incoder-1B	python	none	cheminf	code	ch	none	incoder-1B
165	karplusant	0	0.05	incoder/facebook/incoder-1B	python	none	spectroscopy	code	en	none	incoder-1B
166	karplusant	0	0.05	incoder/facebook/incoder-1B	python	none	spectroscopy	code	en	none	incoder-1B
167	karplusant	0	0.05	incoder/facebook/incoder-1B	python	none	spectroscopy	code	en	none	incoder-1B
168	karplusant	0	0.05	incoder/facebook/incoder-1B	python	none	spectroscopy	code	en	none	incoder-1B
169	karplusant	0	0.05	incoder/facebook/incoder-1B	python	none	spectroscopy	code	en	none	incoder-1B
170	kld	0	0.05	incoder/facebook/incoder-1B	python	none	stats	code	en	none	incoder-1B
171	kld	0	0.05	incoder/facebook/incoder-1B	python	none	stats	code	en	none	incoder-1B
172	kld	0	0.05	incoder/facebook/incoder-1B	python	none	stats	code	en	none	incoder-1B
173	kld	0	0.05	incoder/facebook/incoder-1B	python	none	stats	code	en	none	incoder-1B
174	kld	0	0.05	incoder/facebook/incoder-1B	python	none	stats	code	en	none	incoder-1B
175	langevin_dynamics	0	0.05	incoder/facebook/incoder-1B	python	none	sim	code	en	none	incoder-1B
176	langevin_dynamics	0	0.05	incoder/facebook/incoder-1B	python	none	sim	code	en	none	incoder-1B
177	langevin_dynamics	0	0.05	incoder/facebook/incoder-1B	python	none	sim	code	en	none	incoder-1B
178	langevin_dynamics	0	0.05	incoder/facebook/incoder-1B	python	none	sim	code	en	none	incoder-1B
179	langevin_dynamics	0	0.05	incoder/facebook/incoder-1B	python	none	sim	code	en	none	incoder-1B
180	weighted-least-squares	0	0.05	incoder/facebook/incoder-1B	python	none	stats	code	en	none	incoder-1B
181	weighted-least-squares	0	0.05	incoder/facebook/incoder-1B	python	none	stats	code	en	none	incoder-1B
182	weighted-least-squares	0	0.05	incoder/facebook/incoder-1B	python	none	stats	code	en	none	incoder-1B
183	weighted-least-squares	0	0.05	incoder/facebook/incoder-1B	python	none	stats	code	en	none	incoder-1B
184	weighted-least-squares	0	0.05	incoder/facebook/incoder-1B	python	none	stats	code	en	none	incoder-1B
185	lipinski_rule_of_five	0	0.05	incoder/facebook/incoder-1B	python	none	cheminf	code	ch	none	incoder-1B
186	lipinski_rule_of_five	0	0.05	incoder/facebook/incoder-1B	python	none	cheminf	code	ch	none	incoder-1B
187	lipinski_rule_of_five	0	0.05	incoder/facebook/incoder-1B	python	none	cheminf	code	ch	none	incoder-1B
188	lipinski_rule_of_five	0	0.05	incoder/facebook/incoder-1B	python	none	cheminf	code	ch	none	incoder-1B
189	lipinski_rule_of_five	0	0.05	incoder/facebook/incoder-1B	python	none	cheminf	code	ch	none	incoder-1B
190	mape	0	0.05	incoder/facebook/incoder-1B	python	none	stats	code	en	none	incoder-1B
191	mape	0	0.05	incoder/facebook/incoder-1B	python	none	stats	code	en	none	incoder-1B
192	mape	0	0.05	incoder/facebook/incoder-1B	python	none	stats	code	en	none	incoder-1B
193	mape	0	0.05	incoder/facebook/incoder-1B	python	none	stats	code	en	none	incoder-1B
194	mape	0	0.05	incoder/facebook/incoder-1B	python	none	stats	code	en	none	incoder-1B
195	mapping_operator	0	0.05	incoder/facebook/incoder-1B	python	none	md	code	en	none	incoder-1B
196	mapping_operator	0	0.05	incoder/facebook/incoder-1B	python	none	md	code	en	none	incoder-1B
197	mapping_operator	0	0.05	incoder/facebook/incoder-1B	python	none	md	code	en	none	incoder-1B
198	mapping_operator	0	0.05	incoder/facebook/incoder-1B	python	none	md	code	en	none	incoder-1B
199	mapping_operator	0	0.05	incoder/facebook/incoder-1B	python	none	md	code	en	none	incoder-1B
200	max-boltz	0	0.05	incoder/facebook/incoder-1B	python	none	genchem	code	ch	none	incoder-1B
201	max-boltz	0	0.05	incoder/facebook/incoder-1B	python	none	thermo	code	ch	none	incoder-1B
202	max-boltz	0	0.05	incoder/facebook/incoder-1B	python	none	genchem	code	ch	none	incoder-1B
203	max-boltz	0	0.05	incoder/facebook/incoder-1B	python	none	thermo	code	ch	none	incoder-1B
204	max-boltz	0	0.05	incoder/facebook/incoder-1B	python	none	genchem	code	ch	none	incoder-1B
205	max-boltz	0	0.05	incoder/facebook/incoder-1B	python	none	thermo	code	ch	none	incoder-1B
206	max-boltz	0	0.05	incoder/facebook/incoder-1B	python	none	genchem	code	ch	none	incoder-1B
207	max-boltz	0	0.05	incoder/facebook/incoder-1B	python	none	thermo	code	ch	none	incoder-1B
208	max-boltz	0	0.05	incoder/facebook/incoder-1B	python	none	genchem	code	ch	none	incoder-1B
209	max-boltz	0	0.05	incoder/facebook/incoder-1B	python	none	thermo	code	ch	none	incoder-1B
210	mc_harmonic	1	0.05	incoder/facebook/incoder-1B	python	none	sim	human	en	none	incoder-1B
211	mc_harmonic	1	0.05	incoder/facebook/incoder-1B	python	none	sim	human	en	none	incoder-1B
212	mc_harmonic	1	0.05	incoder/facebook/incoder-1B	python	none	sim	human	en	none	incoder-1B
213	mc_harmonic	1	0.05	incoder/facebook/incoder-1B	python	none	sim	human	en	none	incoder-1B
214	mc_harmonic	1	0.05	incoder/facebook/incoder-1B	python	none	sim	human	en	none	incoder-1B
215	mc_ising	1	0.05	incoder/facebook/incoder-1B	python	none	sim	human	en	none	incoder-1B
216	mc_ising	1	0.05	incoder/facebook/incoder-1B	python	none	sim	human	en	none	incoder-1B
217	mc_ising	1	0.05	incoder/facebook/incoder-1B	python	none	sim	human	en	none	incoder-1B
218	mc_ising	1	0.05	incoder/facebook/incoder-1B	python	none	sim	human	en	none	incoder-1B
219	mc_ising	1	0.05	incoder/facebook/incoder-1B	python	none	sim	human	en	none	incoder-1B
220	michaelis	0	0.05	incoder/facebook/incoder-1B	python	none	bio	code	en	none	incoder-1B
221	michaelis	0	0.05	incoder/facebook/incoder-1B	python	none	thermo	code	en	none	incoder-1B
222	michaelis	0	0.05	incoder/facebook/incoder-1B	python	none	bio	code	en	none	incoder-1B
223	michaelis	0	0.05	incoder/facebook/incoder-1B	python	none	thermo	code	en	none	incoder-1B
224	michaelis	0	0.05	incoder/facebook/incoder-1B	python	none	bio	code	en	none	incoder-1B
225	michaelis	0	0.05	incoder/facebook/incoder-1B	python	none	thermo	code	en	none	incoder-1B
226	michaelis	0	0.05	incoder/facebook/incoder-1B	python	none	bio	code	en	none	incoder-1B
227	michaelis	0	0.05	incoder/facebook/incoder-1B	python	none	thermo	code	en	none	incoder-1B
228	michaelis	0	0.05	incoder/facebook/incoder-1B	python	none	bio	code	en	none	incoder-1B
229	michaelis	0	0.05	incoder/facebook/incoder-1B	python	none	thermo	code	en	none	incoder-1B
230	mol_charge	0	0.05	incoder/facebook/incoder-1B	python	none	cheminf	code	ch	none	incoder-1B
231	mol_charge	0	0.05	incoder/facebook/incoder-1B	python	none	cheminf	code	ch	none	incoder-1B
232	mol_charge	0	0.05	incoder/facebook/incoder-1B	python	none	cheminf	code	ch	none	incoder-1B
233	mol_charge	0	0.05	incoder/facebook/incoder-1B	python	none	cheminf	code	ch	none	incoder-1B
234	mol_charge	0	0.05	incoder/facebook/incoder-1B	python	none	cheminf	code	ch	none	incoder-1B
235	net_charge	0	0.05	incoder/facebook/incoder-1B	python	none	bio	code	en	none	incoder-1B
236	net_charge	0	0.05	incoder/facebook/incoder-1B	python	none	bio	code	en	none	incoder-1B
237	net_charge	0	0.05	incoder/facebook/incoder-1B	python	none	bio	code	en	none	incoder-1B
238	net_charge	0	0.05	incoder/facebook/incoder-1B	python	none	bio	code	en	none	incoder-1B
239	net_charge	0	0.05	incoder/facebook/incoder-1B	python	none	bio	code	en	none	incoder-1B
240	nwchem_input_emin	0	0.05	incoder/facebook/incoder-1B	python	none	qm	human	en	none	incoder-1B
241	nwchem_input_emin	1	0.05	incoder/facebook/incoder-1B	python	none	qm	human	en	none	incoder-1B
242	nwchem_input_emin	1	0.05	incoder/facebook/incoder-1B	python	none	qm	human	en	none	incoder-1B
243	nwchem_input_emin	1	0.05	incoder/facebook/incoder-1B	python	none	qm	human	en	none	incoder-1B
244	nwchem_input_emin	1	0.05	incoder/facebook/incoder-1B	python	none	qm	human	en	none	incoder-1B
245	ohe	0	0.05	incoder/facebook/incoder-1B	python	none	stats	code	en	none	incoder-1B
246	ohe	0	0.05	incoder/facebook/incoder-1B	python	none	stats	code	en	none	incoder-1B
247	ohe	0	0.05	incoder/facebook/incoder-1B	python	none	stats	code	en	none	incoder-1B
248	ohe	0	0.05	incoder/facebook/incoder-1B	python	none	stats	code	en	none	incoder-1B
249	ohe	0	0.05	incoder/facebook/incoder-1B	python	none	stats	code	en	none	incoder-1B
250	osmotic_pressure	0	0.05	incoder/facebook/incoder-1B	python	none	genchem	code	ch	none	incoder-1B
251	osmotic_pressure	1	0.05	incoder/facebook/incoder-1B	python	none	genchem	code	ch	none	incoder-1B
252	osmotic_pressure	0	0.05	incoder/facebook/incoder-1B	python	none	genchem	code	ch	none	incoder-1B
253	osmotic_pressure	1	0.05	incoder/facebook/incoder-1B	python	none	genchem	code	ch	none	incoder-1B
254	osmotic_pressure	0	0.05	incoder/facebook/incoder-1B	python	none	genchem	code	ch	none	incoder-1B
255	pair_wise	0	0.05	incoder/facebook/incoder-1B	python	none	md	code	en	none	incoder-1B
256	pair_wise	0	0.05	incoder/facebook/incoder-1B	python	none	bio	code	en	none	incoder-1B
257	pair_wise	0	0.05	incoder/facebook/incoder-1B	python	none	md	code	en	none	incoder-1B
258	pair_wise	0	0.05	incoder/facebook/incoder-1B	python	none	bio	code	en	none	incoder-1B
259	pair_wise	0	0.05	incoder/facebook/incoder-1B	python	none	md	code	en	none	incoder-1B
260	pair_wise	0	0.05	incoder/facebook/incoder-1B	python	none	bio	code	en	none	incoder-1B
261	pair_wise	0	0.05	incoder/facebook/incoder-1B	python	none	md	code	en	none	incoder-1B
262	pair_wise	0	0.05	incoder/facebook/incoder-1B	python	none	bio	code	en	none	incoder-1B
263	pair_wise	0	0.05	incoder/facebook/incoder-1B	python	none	md	code	en	none	incoder-1B
264	pair_wise	0	0.05	incoder/facebook/incoder-1B	python	none	bio	code	en	none	incoder-1B
265	pauli_matrices	0	0.05	incoder/facebook/incoder-1B	python	none	qm	code	en	none	incoder-1B
266	pauli_matrices	0	0.05	incoder/facebook/incoder-1B	python	none	qm	code	en	none	incoder-1B
267	pauli_matrices	0	0.05	incoder/facebook/incoder-1B	python	none	qm	code	en	none	incoder-1B
268	pauli_matrices	0	0.05	incoder/facebook/incoder-1B	python	none	qm	code	en	none	incoder-1B
269	pauli_matrices	0	0.05	incoder/facebook/incoder-1B	python	none	qm	code	en	none	incoder-1B
270	pib_1d	0	0.05	incoder/facebook/incoder-1B	python	none	qm	code	en	none	incoder-1B
271	pib_1d	0	0.05	incoder/facebook/incoder-1B	python	none	qm	code	en	none	incoder-1B
272	pib_1d	0	0.05	incoder/facebook/incoder-1B	python	none	qm	code	en	none	incoder-1B
273	pib_1d	0	0.05	incoder/facebook/incoder-1B	python	none	qm	code	en	none	incoder-1B
274	pib_1d	0	0.05	incoder/facebook/incoder-1B	python	none	qm	code	en	none	incoder-1B
275	pi	0	0.05	incoder/facebook/incoder-1B	python	none	stats	code	en	none	incoder-1B
276	pi	0	0.05	incoder/facebook/incoder-1B	python	none	stats	code	en	none	incoder-1B
277	pi	0	0.05	incoder/facebook/incoder-1B	python	none	stats	code	en	none	incoder-1B
278	pi	0	0.05	incoder/facebook/incoder-1B	python	none	stats	code	en	none	incoder-1B
279	pi	0	0.05	incoder/facebook/incoder-1B	python	none	stats	code	en	none	incoder-1B
280	plot_3d_sin	1	0.05	incoder/facebook/incoder-1B	python	none	plot	human	en	none	incoder-1B
281	plot_3d_sin	1	0.05	incoder/facebook/incoder-1B	python	none	plot	human	en	none	incoder-1B
282	plot_3d_sin	1	0.05	incoder/facebook/incoder-1B	python	none	plot	human	en	none	incoder-1B
283	plot_3d_sin	1	0.05	incoder/facebook/incoder-1B	python	none	plot	human	en	none	incoder-1B
284	plot_3d_sin	1	0.05	incoder/facebook/incoder-1B	python	none	plot	human	en	none	incoder-1B
285	plot_bar	0	0.05	incoder/facebook/incoder-1B	python	none	plot	human	en	none	incoder-1B
286	plot_bar	1	0.05	incoder/facebook/incoder-1B	python	none	plot	human	en	none	incoder-1B
287	plot_bar	1	0.05	incoder/facebook/incoder-1B	python	none	plot	human	en	none	incoder-1B
288	plot_bar	0	0.05	incoder/facebook/incoder-1B	python	none	plot	human	en	none	incoder-1B
289	plot_bar	0	0.05	incoder/facebook/incoder-1B	python	none	plot	human	en	none	incoder-1B
290	plot_contour	0	0.05	incoder/facebook/incoder-1B	python	none	plot	human	en	none	incoder-1B
291	plot_contour	0	0.05	incoder/facebook/incoder-1B	python	none	plot	human	en	none	incoder-1B
292	plot_contour	0	0.05	incoder/facebook/incoder-1B	python	none	plot	human	en	none	incoder-1B
293	plot_contour	0	0.05	incoder/facebook/incoder-1B	python	none	plot	human	en	none	incoder-1B
294	plot_contour	0	0.05	incoder/facebook/incoder-1B	python	none	plot	human	en	none	incoder-1B
295	plot_correlation	0	0.05	incoder/facebook/incoder-1B	python	none	plot	human	en	none	incoder-1B
296	plot_correlation	0	0.05	incoder/facebook/incoder-1B	python	none	plot	human	en	none	incoder-1B
297	plot_correlation	0	0.05	incoder/facebook/incoder-1B	python	none	plot	human	en	none	incoder-1B
298	plot_correlation	1	0.05	incoder/facebook/incoder-1B	python	none	plot	human	en	none	incoder-1B
299	plot_correlation	1	0.05	incoder/facebook/incoder-1B	python	none	plot	human	en	none	incoder-1B
300	plot_dual_axis	0	0.05	incoder/facebook/incoder-1B	python	none	plot	human	en	none	incoder-1B
301	plot_dual_axis	0	0.05	incoder/facebook/incoder-1B	python	none	plot	human	en	none	incoder-1B
302	plot_dual_axis	0	0.05	incoder/facebook/incoder-1B	python	none	plot	human	en	none	incoder-1B
303	plot_dual_axis	0	0.05	incoder/facebook/incoder-1B	python	none	plot	human	en	none	incoder-1B
304	plot_dual_axis	0	0.05	incoder/facebook/incoder-1B	python	none	plot	human	en	none	incoder-1B
305	plot_emoji	1	0.05	incoder/facebook/incoder-1B	python	none	plot	human	en	none	incoder-1B
306	plot_emoji	0	0.05	incoder/facebook/incoder-1B	python	none	plot	human	en	none	incoder-1B
307	plot_emoji	0	0.05	incoder/facebook/incoder-1B	python	none	plot	human	en	none	incoder-1B
308	plot_emoji	0	0.05	incoder/facebook/incoder-1B	python	none	plot	human	en	none	incoder-1B
309	plot_emoji	1	0.05	incoder/facebook/incoder-1B	python	none	plot	human	en	none	incoder-1B
310	plot_outside_legend	1	0.05	incoder/facebook/incoder-1B	python	none	plot	human	en	none	incoder-1B
311	plot_outside_legend	0	0.05	incoder/facebook/incoder-1B	python	none	plot	human	en	none	incoder-1B
312	plot_outside_legend	1	0.05	incoder/facebook/incoder-1B	python	none	plot	human	en	none	incoder-1B
313	plot_outside_legend	1	0.05	incoder/facebook/incoder-1B	python	none	plot	human	en	none	incoder-1B
314	plot_outside_legend	1	0.05	incoder/facebook/incoder-1B	python	none	plot	human	en	none	incoder-1B
315	plot_pointsize	0	0.05	incoder/facebook/incoder-1B	python	none	plot	human	en	none	incoder-1B
316	plot_pointsize	1	0.05	incoder/facebook/incoder-1B	python	none	plot	human	en	none	incoder-1B
317	plot_pointsize	0	0.05	incoder/facebook/incoder-1B	python	none	plot	human	en	none	incoder-1B
318	plot_pointsize	1	0.05	incoder/facebook/incoder-1B	python	none	plot	human	en	none	incoder-1B
319	plot_pointsize	0	0.05	incoder/facebook/incoder-1B	python	none	plot	human	en	none	incoder-1B
320	plot_sin	1	0.05	incoder/facebook/incoder-1B	python	none	plot	human	en	none	incoder-1B
321	plot_sin	1	0.05	incoder/facebook/incoder-1B	python	none	plot	human	en	none	incoder-1B
322	plot_sin	1	0.05	incoder/facebook/incoder-1B	python	none	plot	human	en	none	incoder-1B
323	plot_sin	1	0.05	incoder/facebook/incoder-1B	python	none	plot	human	en	none	incoder-1B
324	plot_sin	1	0.05	incoder/facebook/incoder-1B	python	none	plot	human	en	none	incoder-1B
325	plot_sin_polar	1	0.05	incoder/facebook/incoder-1B	python	none	plot	human	en	none	incoder-1B
326	plot_sin_polar	1	0.05	incoder/facebook/incoder-1B	python	none	plot	human	en	none	incoder-1B
327	plot_sin_polar	1	0.05	incoder/facebook/incoder-1B	python	none	plot	human	en	none	incoder-1B
328	plot_sin_polar	1	0.05	incoder/facebook/incoder-1B	python	none	plot	human	en	none	incoder-1B
329	plot_sin_polar	1	0.05	incoder/facebook/incoder-1B	python	none	plot	human	en	none	incoder-1B
330	pred_interval	0	0.05	incoder/facebook/incoder-1B	python	none	stats	code	en	none	incoder-1B
331	pred_interval	0	0.05	incoder/facebook/incoder-1B	python	none	stats	code	en	none	incoder-1B
332	pred_interval	0	0.05	incoder/facebook/incoder-1B	python	none	stats	code	en	none	incoder-1B
333	pred_interval	0	0.05	incoder/facebook/incoder-1B	python	none	stats	code	en	none	incoder-1B
334	pred_interval	0	0.05	incoder/facebook/incoder-1B	python	none	stats	code	en	none	incoder-1B
335	protein-render	0	0.05	incoder/facebook/incoder-1B	python	none	bio	human	en	none	incoder-1B
336	protein-render	0	0.05	incoder/facebook/incoder-1B	python	none	bio	human	en	none	incoder-1B
337	protein-render	0	0.05	incoder/facebook/incoder-1B	python	none	bio	human	en	none	incoder-1B
338	protein-render	0	0.05	incoder/facebook/incoder-1B	python	none	bio	human	en	none	incoder-1B
339	protein-render	0	0.05	incoder/facebook/incoder-1B	python	none	bio	human	en	none	incoder-1B
340	pubchem	0	0.05	incoder/facebook/incoder-1B	python	none	cheminf	code	ch	none	incoder-1B
341	pubchem	0	0.05	incoder/facebook/incoder-1B	python	none	cheminf	code	ch	none	incoder-1B
342	pubchem	0	0.05	incoder/facebook/incoder-1B	python	none	cheminf	code	ch	none	incoder-1B
343	pubchem	0	0.05	incoder/facebook/incoder-1B	python	none	cheminf	code	ch	none	incoder-1B
344	pubchem	0	0.05	incoder/facebook/incoder-1B	python	none	cheminf	code	ch	none	incoder-1B
345	pyscf_energy	0	0.05	incoder/facebook/incoder-1B	python	none	qm	code	en	none	incoder-1B
346	pyscf_energy	0	0.05	incoder/facebook/incoder-1B	python	none	qm	code	en	none	incoder-1B
347	pyscf_energy	0	0.05	incoder/facebook/incoder-1B	python	none	qm	code	en	none	incoder-1B
348	pyscf_energy	0	0.05	incoder/facebook/incoder-1B	python	none	qm	code	en	none	incoder-1B
349	pyscf_energy	0	0.05	incoder/facebook/incoder-1B	python	none	qm	code	en	none	incoder-1B
350	qed	0	0.05	incoder/facebook/incoder-1B	python	none	cheminf	code	ch	none	incoder-1B
351	qed	0	0.05	incoder/facebook/incoder-1B	python	none	cheminf	code	ch	none	incoder-1B
352	qed	0	0.05	incoder/facebook/incoder-1B	python	none	cheminf	code	ch	none	incoder-1B
353	qed	0	0.05	incoder/facebook/incoder-1B	python	none	cheminf	code	ch	none	incoder-1B
354	qed	0	0.05	incoder/facebook/incoder-1B	python	none	cheminf	code	ch	none	incoder-1B
355	quantile	0	0.05	incoder/facebook/incoder-1B	python	none	stats	code	en	none	incoder-1B
356	quantile	0	0.05	incoder/facebook/incoder-1B	python	none	stats	code	en	none	incoder-1B
357	quantile	0	0.05	incoder/facebook/incoder-1B	python	none	stats	code	en	none	incoder-1B
358	quantile	0	0.05	incoder/facebook/incoder-1B	python	none	stats	code	en	none	incoder-1B
359	quantile	0	0.05	incoder/facebook/incoder-1B	python	none	stats	code	en	none	incoder-1B
360	random_walk	0	0.05	incoder/facebook/incoder-1B	python	none	sim	code	en	none	incoder-1B
361	random_walk	0	0.05	incoder/facebook/incoder-1B	python	none	stats	code	en	none	incoder-1B
362	random_walk	0	0.05	incoder/facebook/incoder-1B	python	none	sim	code	en	none	incoder-1B
363	random_walk	0	0.05	incoder/facebook/incoder-1B	python	none	stats	code	en	none	incoder-1B
364	random_walk	0	0.05	incoder/facebook/incoder-1B	python	none	sim	code	en	none	incoder-1B
365	random_walk	0	0.05	incoder/facebook/incoder-1B	python	none	stats	code	en	none	incoder-1B
366	random_walk	0	0.05	incoder/facebook/incoder-1B	python	none	sim	code	en	none	incoder-1B
367	random_walk	0	0.05	incoder/facebook/incoder-1B	python	none	stats	code	en	none	incoder-1B
368	random_walk	0	0.05	incoder/facebook/incoder-1B	python	none	sim	code	en	none	incoder-1B
369	random_walk	0	0.05	incoder/facebook/incoder-1B	python	none	stats	code	en	none	incoder-1B
370	remove-water	0	0.05	incoder/facebook/incoder-1B	python	none	md	code	en	none	incoder-1B
371	remove-water	0	0.05	incoder/facebook/incoder-1B	python	none	md	code	en	none	incoder-1B
372	remove-water	0	0.05	incoder/facebook/incoder-1B	python	none	md	code	en	none	incoder-1B
373	remove-water	0	0.05	incoder/facebook/incoder-1B	python	none	md	code	en	none	incoder-1B
374	remove-water	0	0.05	incoder/facebook/incoder-1B	python	none	md	code	en	none	incoder-1B
375	rmse	1	0.05	incoder/facebook/incoder-1B	python	none	stats	code	en	none	incoder-1B
376	rmse	1	0.05	incoder/facebook/incoder-1B	python	none	stats	code	en	none	incoder-1B
377	rmse	1	0.05	incoder/facebook/incoder-1B	python	none	stats	code	en	none	incoder-1B
378	rmse	1	0.05	incoder/facebook/incoder-1B	python	none	stats	code	en	none	incoder-1B
379	rmse	1	0.05	incoder/facebook/incoder-1B	python	none	stats	code	en	none	incoder-1B
380	rms_velocity	0	0.05	incoder/facebook/incoder-1B	python	none	thermo	code	en	none	incoder-1B
381	rms_velocity	0	0.05	incoder/facebook/incoder-1B	python	none	thermo	code	en	none	incoder-1B
382	rms_velocity	0	0.05	incoder/facebook/incoder-1B	python	none	thermo	code	en	none	incoder-1B
383	rms_velocity	0	0.05	incoder/facebook/incoder-1B	python	none	thermo	code	en	none	incoder-1B
384	rms_velocity	0	0.05	incoder/facebook/incoder-1B	python	none	thermo	code	en	none	incoder-1B
385	rog	0	0.05	incoder/facebook/incoder-1B	python	none	md	code	en	none	incoder-1B
386	rog	0	0.05	incoder/facebook/incoder-1B	python	none	bio	code	en	none	incoder-1B
387	rog	0	0.05	incoder/facebook/incoder-1B	python	none	md	code	en	none	incoder-1B
388	rog	0	0.05	incoder/facebook/incoder-1B	python	none	bio	code	en	none	incoder-1B
389	rog	0	0.05	incoder/facebook/incoder-1B	python	none	md	code	en	none	incoder-1B
390	rog	0	0.05	incoder/facebook/incoder-1B	python	none	bio	code	en	none	incoder-1B
391	rog	0	0.05	incoder/facebook/incoder-1B	python	none	md	code	en	none	incoder-1B
392	rog	0	0.05	incoder/facebook/incoder-1B	python	none	bio	code	en	none	incoder-1B
393	rog	0	0.05	incoder/facebook/incoder-1B	python	none	md	code	en	none	incoder-1B
394	rog	0	0.05	incoder/facebook/incoder-1B	python	none	bio	code	en	none	incoder-1B
395	rotationant	0	0.05	incoder/facebook/incoder-1B	python	none	spectroscopy	code	en	none	incoder-1B
396	rotationant	0	0.05	incoder/facebook/incoder-1B	python	none	spectroscopy	code	en	none	incoder-1B
397	rotationant	0	0.05	incoder/facebook/incoder-1B	python	none	spectroscopy	code	en	none	incoder-1B
398	rotationant	0	0.05	incoder/facebook/incoder-1B	python	none	spectroscopy	code	en	none	incoder-1B
399	rotationant	0	0.05	incoder/facebook/incoder-1B	python	none	spectroscopy	code	en	none	incoder-1B
400	rotation_higherant	0	0.05	incoder/facebook/incoder-1B	python	none	spectroscopy	code	en	none	incoder-1B
401	rotation_higherant	0	0.05	incoder/facebook/incoder-1B	python	none	spectroscopy	code	en	none	incoder-1B
402	rotation_higherant	0	0.05	incoder/facebook/incoder-1B	python	none	spectroscopy	code	en	none	incoder-1B
403	rotation_higherant	0	0.05	incoder/facebook/incoder-1B	python	none	spectroscopy	code	en	none	incoder-1B
404	rotation_higherant	0	0.05	incoder/facebook/incoder-1B	python	none	spectroscopy	code	en	none	incoder-1B
405	sasa	0	0.05	incoder/facebook/incoder-1B	python	none	md	code	en	none	incoder-1B
406	sasa	0	0.05	incoder/facebook/incoder-1B	python	none	bio	code	en	none	incoder-1B
407	sasa	0	0.05	incoder/facebook/incoder-1B	python	none	md	code	en	none	incoder-1B
408	sasa	0	0.05	incoder/facebook/incoder-1B	python	none	bio	code	en	none	incoder-1B
409	sasa	0	0.05	incoder/facebook/incoder-1B	python	none	md	code	en	none	incoder-1B
410	sasa	0	0.05	incoder/facebook/incoder-1B	python	none	bio	code	en	none	incoder-1B
411	sasa	0	0.05	incoder/facebook/incoder-1B	python	none	md	code	en	none	incoder-1B
412	sasa	0	0.05	incoder/facebook/incoder-1B	python	none	bio	code	en	none	incoder-1B
413	sasa	0	0.05	incoder/facebook/incoder-1B	python	none	md	code	en	none	incoder-1B
414	sasa	0	0.05	incoder/facebook/incoder-1B	python	none	bio	code	en	none	incoder-1B
415	scaffold	0	0.05	incoder/facebook/incoder-1B	python	none	cheminf	code	ch	none	incoder-1B
416	scaffold	0	0.05	incoder/facebook/incoder-1B	python	none	cheminf	code	ch	none	incoder-1B
417	scaffold	0	0.05	incoder/facebook/incoder-1B	python	none	cheminf	code	ch	none	incoder-1B
418	scaffold	0	0.05	incoder/facebook/incoder-1B	python	none	cheminf	code	ch	none	incoder-1B
419	scaffold	0	0.05	incoder/facebook/incoder-1B	python	none	cheminf	code	ch	none	incoder-1B
420	seq-align	0	0.05	incoder/facebook/incoder-1B	python	none	bio	code	en	none	incoder-1B
421	seq-align	0	0.05	incoder/facebook/incoder-1B	python	none	bio	code	en	none	incoder-1B
422	seq-align	0	0.05	incoder/facebook/incoder-1B	python	none	bio	code	en	none	incoder-1B
423	seq-align	0	0.05	incoder/facebook/incoder-1B	python	none	bio	code	en	none	incoder-1B
424	seq-align	0	0.05	incoder/facebook/incoder-1B	python	none	bio	code	en	none	incoder-1B
425	seq-trans	0	0.05	incoder/facebook/incoder-1B	python	none	bio	code	en	none	incoder-1B
426	seq-trans	0	0.05	incoder/facebook/incoder-1B	python	none	bio	code	en	none	incoder-1B
427	seq-trans	0	0.05	incoder/facebook/incoder-1B	python	none	bio	code	en	none	incoder-1B
428	seq-trans	0	0.05	incoder/facebook/incoder-1B	python	none	bio	code	en	none	incoder-1B
429	seq-trans	0	0.05	incoder/facebook/incoder-1B	python	none	bio	code	en	none	incoder-1B
430	spectral_r	0	0.05	incoder/facebook/incoder-1B	python	none	stats	code	en	none	incoder-1B
431	spectral_r	0	0.05	incoder/facebook/incoder-1B	python	none	stats	code	en	none	incoder-1B
432	spectral_r	0	0.05	incoder/facebook/incoder-1B	python	none	stats	code	en	none	incoder-1B
433	spectral_r	0	0.05	incoder/facebook/incoder-1B	python	none	stats	code	en	none	incoder-1B
434	spectral_r	0	0.05	incoder/facebook/incoder-1B	python	none	stats	code	en	none	incoder-1B
435	find_peaks	0	0.05	incoder/facebook/incoder-1B	python	none	spectroscopy	code	en	none	incoder-1B
436	find_peaks	0	0.05	incoder/facebook/incoder-1B	python	none	spectroscopy	code	en	none	incoder-1B
437	find_peaks	0	0.05	incoder/facebook/incoder-1B	python	none	spectroscopy	code	en	none	incoder-1B
438	find_peaks	0	0.05	incoder/facebook/incoder-1B	python	none	spectroscopy	code	en	none	incoder-1B
439	find_peaks	0	0.05	incoder/facebook/incoder-1B	python	none	spectroscopy	code	en	none	incoder-1B
440	speed_of_sound	0	0.05	incoder/facebook/incoder-1B	python	none	thermo	code	en	none	incoder-1B
441	speed_of_sound	0	0.05	incoder/facebook/incoder-1B	python	none	thermo	code	en	none	incoder-1B
442	speed_of_sound	0	0.05	incoder/facebook/incoder-1B	python	none	thermo	code	en	none	incoder-1B
443	speed_of_sound	0	0.05	incoder/facebook/incoder-1B	python	none	thermo	code	en	none	incoder-1B
444	speed_of_sound	0	0.05	incoder/facebook/incoder-1B	python	none	thermo	code	en	none	incoder-1B
445	substructure	0	0.05	incoder/facebook/incoder-1B	python	none	cheminf	code	ch	none	incoder-1B
446	substructure	0	0.05	incoder/facebook/incoder-1B	python	none	cheminf	code	ch	none	incoder-1B
447	substructure	0	0.05	incoder/facebook/incoder-1B	python	none	cheminf	code	ch	none	incoder-1B
448	substructure	0	0.05	incoder/facebook/incoder-1B	python	none	cheminf	code	ch	none	incoder-1B
449	substructure	0	0.05	incoder/facebook/incoder-1B	python	none	cheminf	code	ch	none	incoder-1B
450	tanimoto	0	0.05	incoder/facebook/incoder-1B	python	none	cheminf	code	ch	none	incoder-1B
451	tanimoto	0	0.05	incoder/facebook/incoder-1B	python	none	cheminf	code	ch	none	incoder-1B
452	tanimoto	0	0.05	incoder/facebook/incoder-1B	python	none	cheminf	code	ch	none	incoder-1B
453	tanimoto	0	0.05	incoder/facebook/incoder-1B	python	none	cheminf	code	ch	none	incoder-1B
454	tanimoto	0	0.05	incoder/facebook/incoder-1B	python	none	cheminf	code	ch	none	incoder-1B
455	unbdistance	0	0.05	incoder/facebook/incoder-1B	python	none	md	code	en	none	incoder-1B
456	unbdistance	0	0.05	incoder/facebook/incoder-1B	python	none	md	code	en	none	incoder-1B
457	unbdistance	0	0.05	incoder/facebook/incoder-1B	python	none	md	code	en	none	incoder-1B
458	unbdistance	0	0.05	incoder/facebook/incoder-1B	python	none	md	code	en	none	incoder-1B
459	unbdistance	0	0.05	incoder/facebook/incoder-1B	python	none	md	code	en	none	incoder-1B
460	velocity_verlet_integration	0	0.05	incoder/facebook/incoder-1B	python	none	sim	code	en	none	incoder-1B
461	velocity_verlet_integration	0	0.05	incoder/facebook/incoder-1B	python	none	sim	code	en	none	incoder-1B
462	velocity_verlet_integration	0	0.05	incoder/facebook/incoder-1B	python	none	sim	code	en	none	incoder-1B
463	velocity_verlet_integration	0	0.05	incoder/facebook/incoder-1B	python	none	sim	code	en	none	incoder-1B
464	velocity_verlet_integration	0	0.05	incoder/facebook/incoder-1B	python	none	sim	code	en	none	incoder-1B
0	aa_polarity	0	0.05	incoder/facebook/incoder-1B	python	python	bio	code	en	custom	incoder-1B
1	aa_polarity	0	0.05	incoder/facebook/incoder-1B	python	python	bio	code	en	custom	incoder-1B
2	aa_polarity	0	0.05	incoder/facebook/incoder-1B	python	python	bio	code	en	custom	incoder-1B
3	aa_polarity	0	0.05	incoder/facebook/incoder-1B	python	python	bio	code	en	custom	incoder-1B
4	aa_polarity	0	0.05	incoder/facebook/incoder-1B	python	python	bio	code	en	custom	incoder-1B
5	adiabatic_expansion	0	0.05	incoder/facebook/incoder-1B	python	python	thermo	code	en	custom	incoder-1B
6	adiabatic_expansion	0	0.05	incoder/facebook/incoder-1B	python	python	thermo	code	en	custom	incoder-1B
7	adiabatic_expansion	0	0.05	incoder/facebook/incoder-1B	python	python	thermo	code	en	custom	incoder-1B
8	adiabatic_expansion	0	0.05	incoder/facebook/incoder-1B	python	python	thermo	code	en	custom	incoder-1B
9	adiabatic_expansion	0	0.05	incoder/facebook/incoder-1B	python	python	thermo	code	en	custom	incoder-1B
10	alignment	0	0.05	incoder/facebook/incoder-1B	python	mdtraj	md	code	en	custom	incoder-1B
11	alignment	0	0.05	incoder/facebook/incoder-1B	python	mdtraj	md	code	en	custom	incoder-1B
12	alignment	0	0.05	incoder/facebook/incoder-1B	python	mdtraj	md	code	en	custom	incoder-1B
13	alignment	0	0.05	incoder/facebook/incoder-1B	python	mdtraj	md	code	en	custom	incoder-1B
14	alignment	0	0.05	incoder/facebook/incoder-1B	python	mdtraj	md	code	en	custom	incoder-1B
15	aromatic_aa	0	0.05	incoder/facebook/incoder-1B	python	python	bio	code	en	custom	incoder-1B
16	aromatic_aa	0	0.05	incoder/facebook/incoder-1B	python	python	bio	code	en	custom	incoder-1B
17	aromatic_aa	0	0.05	incoder/facebook/incoder-1B	python	python	bio	code	en	custom	incoder-1B
18	aromatic_aa	0	0.05	incoder/facebook/incoder-1B	python	python	bio	code	en	custom	incoder-1B
19	aromatic_aa	0	0.05	incoder/facebook/incoder-1B	python	python	bio	code	en	custom	incoder-1B
20	arrhenius	0	0.05	incoder/facebook/incoder-1B	python	python	genchem	code	ch	custom	incoder-1B
21	arrhenius	0	0.05	incoder/facebook/incoder-1B	python	python	thermo	code	ch	custom	incoder-1B
22	arrhenius	0	0.05	incoder/facebook/incoder-1B	python	python	genchem	code	ch	custom	incoder-1B
23	arrhenius	0	0.05	incoder/facebook/incoder-1B	python	python	thermo	code	ch	custom	incoder-1B
24	arrhenius	0	0.05	incoder/facebook/incoder-1B	python	python	genchem	code	ch	custom	incoder-1B
25	arrhenius	0	0.05	incoder/facebook/incoder-1B	python	python	thermo	code	ch	custom	incoder-1B
26	arrhenius	0	0.05	incoder/facebook/incoder-1B	python	python	genchem	code	ch	custom	incoder-1B
27	arrhenius	0	0.05	incoder/facebook/incoder-1B	python	python	thermo	code	ch	custom	incoder-1B
28	arrhenius	0	0.05	incoder/facebook/incoder-1B	python	python	genchem	code	ch	custom	incoder-1B
29	arrhenius	0	0.05	incoder/facebook/incoder-1B	python	python	thermo	code	ch	custom	incoder-1B
30	bimolecular	0	0.05	incoder/facebook/incoder-1B	python	python	genchem	code	ch	custom	incoder-1B
31	bimolecular	0	0.05	incoder/facebook/incoder-1B	python	python	genchem	code	ch	custom	incoder-1B
32	bimolecular	0	0.05	incoder/facebook/incoder-1B	python	python	genchem	code	ch	custom	incoder-1B
33	bimolecular	0	0.05	incoder/facebook/incoder-1B	python	python	genchem	code	ch	custom	incoder-1B
34	bimolecular	0	0.05	incoder/facebook/incoder-1B	python	python	genchem	code	ch	custom	incoder-1B
35	bb_rad	0	0.05	incoder/facebook/incoder-1B	python	numpy	spectroscopy	code	en	custom	incoder-1B
36	bb_rad	0	0.05	incoder/facebook/incoder-1B	python	numpy	spectroscopy	code	en	custom	incoder-1B
37	bb_rad	0	0.05	incoder/facebook/incoder-1B	python	numpy	spectroscopy	code	en	custom	incoder-1B
38	bb_rad	0	0.05	incoder/facebook/incoder-1B	python	numpy	spectroscopy	code	en	custom	incoder-1B
39	bb_rad	0	0.05	incoder/facebook/incoder-1B	python	numpy	spectroscopy	code	en	custom	incoder-1B
40	blast	0	0.05	incoder/facebook/incoder-1B	python	requests	bio	code	en	custom	incoder-1B
41	blast	0	0.05	incoder/facebook/incoder-1B	python	requests	bio	code	en	custom	incoder-1B
42	blast	0	0.05	incoder/facebook/incoder-1B	python	requests	bio	code	en	custom	incoder-1B
43	blast	0	0.05	incoder/facebook/incoder-1B	python	requests	bio	code	en	custom	incoder-1B
44	blast	0	0.05	incoder/facebook/incoder-1B	python	requests	bio	code	en	custom	incoder-1B
45	braggant	0	0.05	incoder/facebook/incoder-1B	python	numpy	spectroscopy	code	en	custom	incoder-1B
46	braggant	0	0.05	incoder/facebook/incoder-1B	python	numpy	spectroscopy	code	en	custom	incoder-1B
47	braggant	0	0.05	incoder/facebook/incoder-1B	python	numpy	spectroscopy	code	en	custom	incoder-1B
48	braggant	0	0.05	incoder/facebook/incoder-1B	python	numpy	spectroscopy	code	en	custom	incoder-1B
49	braggant	0	0.05	incoder/facebook/incoder-1B	python	numpy	spectroscopy	code	en	custom	incoder-1B
50	bravais	0	0.05	incoder/facebook/incoder-1B	python	python	spectroscopy	code	en	custom	incoder-1B
51	bravais	0	0.05	incoder/facebook/incoder-1B	python	python	spectroscopy	code	en	custom	incoder-1B
52	bravais	0	0.05	incoder/facebook/incoder-1B	python	python	spectroscopy	code	en	custom	incoder-1B
53	bravais	0	0.05	incoder/facebook/incoder-1B	python	python	spectroscopy	code	en	custom	incoder-1B
54	bravais	0	0.05	incoder/facebook/incoder-1B	python	python	spectroscopy	code	en	custom	incoder-1B
55	canonicalize	1	0.05	incoder/facebook/incoder-1B	python	rdkit	cheminf	code	ch	custom	incoder-1B
56	canonicalize	1	0.05	incoder/facebook/incoder-1B	python	rdkit	cheminf	code	ch	custom	incoder-1B
57	canonicalize	1	0.05	incoder/facebook/incoder-1B	python	rdkit	cheminf	code	ch	custom	incoder-1B
58	canonicalize	1	0.05	incoder/facebook/incoder-1B	python	rdkit	cheminf	code	ch	custom	incoder-1B
59	canonicalize	1	0.05	incoder/facebook/incoder-1B	python	rdkit	cheminf	code	ch	custom	incoder-1B
60	carnot_efficiency	0	0.05	incoder/facebook/incoder-1B	python	python	thermo	code	en	custom	incoder-1B
61	carnot_efficiency	0	0.05	incoder/facebook/incoder-1B	python	python	thermo	code	en	custom	incoder-1B
62	carnot_efficiency	0	0.05	incoder/facebook/incoder-1B	python	python	thermo	code	en	custom	incoder-1B
63	carnot_efficiency	0	0.05	incoder/facebook/incoder-1B	python	python	thermo	code	en	custom	incoder-1B
64	carnot_efficiency	0	0.05	incoder/facebook/incoder-1B	python	python	thermo	code	en	custom	incoder-1B
65	claussius	0	0.05	incoder/facebook/incoder-1B	python	python	thermo	code	en	custom	incoder-1B
66	claussius	0	0.05	incoder/facebook/incoder-1B	python	python	thermo	code	en	custom	incoder-1B
67	claussius	0	0.05	incoder/facebook/incoder-1B	python	python	thermo	code	en	custom	incoder-1B
68	claussius	0	0.05	incoder/facebook/incoder-1B	python	python	thermo	code	en	custom	incoder-1B
69	claussius	0	0.05	incoder/facebook/incoder-1B	python	python	thermo	code	en	custom	incoder-1B
70	compare_electronegativity	0	0.05	incoder/facebook/incoder-1B	python	python	genchem	code	ch	custom	incoder-1B
71	compare_electronegativity	0	0.05	incoder/facebook/incoder-1B	python	python	genchem	code	ch	custom	incoder-1B
72	compare_electronegativity	0	0.05	incoder/facebook/incoder-1B	python	python	genchem	code	ch	custom	incoder-1B
73	compare_electronegativity	0	0.05	incoder/facebook/incoder-1B	python	python	genchem	code	ch	custom	incoder-1B
74	compare_electronegativity	0	0.05	incoder/facebook/incoder-1B	python	python	genchem	code	ch	custom	incoder-1B
75	descriptors	0	0.05	incoder/facebook/incoder-1B	python	rdkit	cheminf	code	ch	custom	incoder-1B
76	descriptors	0	0.05	incoder/facebook/incoder-1B	python	rdkit	cheminf	code	ch	custom	incoder-1B
77	descriptors	0	0.05	incoder/facebook/incoder-1B	python	rdkit	cheminf	code	ch	custom	incoder-1B
78	descriptors	0	0.05	incoder/facebook/incoder-1B	python	rdkit	cheminf	code	ch	custom	incoder-1B
79	descriptors	0	0.05	incoder/facebook/incoder-1B	python	rdkit	cheminf	code	ch	custom	incoder-1B
80	de_broglie	0	0.05	incoder/facebook/incoder-1B	python	python	qm	code	ch	custom	incoder-1B
81	de_broglie	0	0.05	incoder/facebook/incoder-1B	python	python	genchem	code	ch	custom	incoder-1B
82	de_broglie	0	0.05	incoder/facebook/incoder-1B	python	python	qm	code	ch	custom	incoder-1B
83	de_broglie	0	0.05	incoder/facebook/incoder-1B	python	python	genchem	code	ch	custom	incoder-1B
84	de_broglie	0	0.05	incoder/facebook/incoder-1B	python	python	qm	code	ch	custom	incoder-1B
85	de_broglie	0	0.05	incoder/facebook/incoder-1B	python	python	genchem	code	ch	custom	incoder-1B
86	de_broglie	0	0.05	incoder/facebook/incoder-1B	python	python	qm	code	ch	custom	incoder-1B
87	de_broglie	0	0.05	incoder/facebook/incoder-1B	python	python	genchem	code	ch	custom	incoder-1B
88	de_broglie	0	0.05	incoder/facebook/incoder-1B	python	python	qm	code	ch	custom	incoder-1B
89	de_broglie	0	0.05	incoder/facebook/incoder-1B	python	python	genchem	code	ch	custom	incoder-1B
90	dipole	0	0.05	incoder/facebook/incoder-1B	python	numpy	genchem	code	ch	custom	incoder-1B
91	dipole	0	0.05	incoder/facebook/incoder-1B	python	numpy	genchem	code	ch	custom	incoder-1B
92	dipole	0	0.05	incoder/facebook/incoder-1B	python	numpy	genchem	code	ch	custom	incoder-1B
93	dipole	0	0.05	incoder/facebook/incoder-1B	python	numpy	genchem	code	ch	custom	incoder-1B
94	dipole	0	0.05	incoder/facebook/incoder-1B	python	numpy	genchem	code	ch	custom	incoder-1B
95	dou	0	0.05	incoder/facebook/incoder-1B	python	rdkit	spectroscopy	code	en	custom	incoder-1B
96	dou	0	0.05	incoder/facebook/incoder-1B	python	rdkit	spectroscopy	code	en	custom	incoder-1B
97	dou	0	0.05	incoder/facebook/incoder-1B	python	rdkit	spectroscopy	code	en	custom	incoder-1B
98	dou	0	0.05	incoder/facebook/incoder-1B	python	rdkit	spectroscopy	code	en	custom	incoder-1B
99	dou	0	0.05	incoder/facebook/incoder-1B	python	rdkit	spectroscopy	code	en	custom	incoder-1B
100	element_mass	0	0.05	incoder/facebook/incoder-1B	python	python	genchem	code	ch	custom	incoder-1B
101	element_mass	0	0.05	incoder/facebook/incoder-1B	python	python	genchem	code	ch	custom	incoder-1B
102	element_mass	0	0.05	incoder/facebook/incoder-1B	python	python	genchem	code	ch	custom	incoder-1B
103	element_mass	0	0.05	incoder/facebook/incoder-1B	python	python	genchem	code	ch	custom	incoder-1B
104	element_mass	0	0.05	incoder/facebook/incoder-1B	python	python	genchem	code	ch	custom	incoder-1B
105	element_name	0	0.05	incoder/facebook/incoder-1B	python	python	genchem	code	ch	custom	incoder-1B
106	element_name	0	0.05	incoder/facebook/incoder-1B	python	python	genchem	code	ch	custom	incoder-1B
107	element_name	0	0.05	incoder/facebook/incoder-1B	python	python	genchem	code	ch	custom	incoder-1B
108	element_name	0	0.05	incoder/facebook/incoder-1B	python	python	genchem	code	ch	custom	incoder-1B
109	element_name	0	0.05	incoder/facebook/incoder-1B	python	python	genchem	code	ch	custom	incoder-1B
110	energy_of_e	0	0.05	incoder/facebook/incoder-1B	python	python	qm	code	en	custom	incoder-1B
111	energy_of_e	0	0.05	incoder/facebook/incoder-1B	python	python	qm	code	en	custom	incoder-1B
112	energy_of_e	0	0.05	incoder/facebook/incoder-1B	python	python	qm	code	en	custom	incoder-1B
113	energy_of_e	0	0.05	incoder/facebook/incoder-1B	python	python	qm	code	en	custom	incoder-1B
114	energy_of_e	0	0.05	incoder/facebook/incoder-1B	python	python	qm	code	en	custom	incoder-1B
115	find_indices	0	0.05	incoder/facebook/incoder-1B	python	mdtraj	md	code	en	custom	incoder-1B
116	find_indices	0	0.05	incoder/facebook/incoder-1B	python	mdtraj	md	code	en	custom	incoder-1B
117	find_indices	0	0.05	incoder/facebook/incoder-1B	python	mdtraj	md	code	en	custom	incoder-1B
118	find_indices	0	0.05	incoder/facebook/incoder-1B	python	mdtraj	md	code	en	custom	incoder-1B
119	find_indices	0	0.05	incoder/facebook/incoder-1B	python	mdtraj	md	code	en	custom	incoder-1B
120	force_constant	0	0.05	incoder/facebook/incoder-1B	python	numpy	spectroscopy	code	en	custom	incoder-1B
121	force_constant	0	0.05	incoder/facebook/incoder-1B	python	numpy	spectroscopy	code	en	custom	incoder-1B
122	force_constant	0	0.05	incoder/facebook/incoder-1B	python	numpy	spectroscopy	code	en	custom	incoder-1B
123	force_constant	0	0.05	incoder/facebook/incoder-1B	python	numpy	spectroscopy	code	en	custom	incoder-1B
124	force_constant	0	0.05	incoder/facebook/incoder-1B	python	numpy	spectroscopy	code	en	custom	incoder-1B
125	freezing_depression	0	0.05	incoder/facebook/incoder-1B	python	python	genchem	code	ch	custom	incoder-1B
126	freezing_depression	0	0.05	incoder/facebook/incoder-1B	python	python	genchem	code	ch	custom	incoder-1B
127	freezing_depression	0	0.05	incoder/facebook/incoder-1B	python	python	genchem	code	ch	custom	incoder-1B
128	freezing_depression	0	0.05	incoder/facebook/incoder-1B	python	python	genchem	code	ch	custom	incoder-1B
129	freezing_depression	0	0.05	incoder/facebook/incoder-1B	python	python	genchem	code	ch	custom	incoder-1B
130	gaussian_input_emin	1	0.05	incoder/facebook/incoder-1B	python	python	qm	human	en	custom	incoder-1B
131	gaussian_input_emin	1	0.05	incoder/facebook/incoder-1B	python	python	qm	human	en	custom	incoder-1B
132	gaussian_input_emin	1	0.05	incoder/facebook/incoder-1B	python	python	qm	human	en	custom	incoder-1B
133	gaussian_input_emin	1	0.05	incoder/facebook/incoder-1B	python	python	qm	human	en	custom	incoder-1B
134	gaussian_input_emin	1	0.05	incoder/facebook/incoder-1B	python	python	qm	human	en	custom	incoder-1B
135	genpos	0	0.05	incoder/facebook/incoder-1B	python	requests	spectroscopy	code	en	custom	incoder-1B
136	genpos	0	0.05	incoder/facebook/incoder-1B	python	requests	spectroscopy	code	en	custom	incoder-1B
137	genpos	0	0.05	incoder/facebook/incoder-1B	python	requests	spectroscopy	code	en	custom	incoder-1B
138	genpos	0	0.05	incoder/facebook/incoder-1B	python	requests	spectroscopy	code	en	custom	incoder-1B
139	genpos	0	0.05	incoder/facebook/incoder-1B	python	requests	spectroscopy	code	en	custom	incoder-1B
140	heating_water	0	0.05	incoder/facebook/incoder-1B	python	python	thermo	code	en	custom	incoder-1B
141	heating_water	0	0.05	incoder/facebook/incoder-1B	python	python	thermo	code	en	custom	incoder-1B
142	heating_water	0	0.05	incoder/facebook/incoder-1B	python	python	thermo	code	en	custom	incoder-1B
143	heating_water	0	0.05	incoder/facebook/incoder-1B	python	python	thermo	code	en	custom	incoder-1B
144	heating_water	0	0.05	incoder/facebook/incoder-1B	python	python	thermo	code	en	custom	incoder-1B
145	hydrophobic_res	0	0.05	incoder/facebook/incoder-1B	python	mdtraj	bio	code	en	custom	incoder-1B
146	hydrophobic_res	0	0.05	incoder/facebook/incoder-1B	python	mdtraj	bio	code	en	custom	incoder-1B
147	hydrophobic_res	0	0.05	incoder/facebook/incoder-1B	python	mdtraj	bio	code	en	custom	incoder-1B
148	hydrophobic_res	0	0.05	incoder/facebook/incoder-1B	python	mdtraj	bio	code	en	custom	incoder-1B
149	hydrophobic_res	0	0.05	incoder/facebook/incoder-1B	python	mdtraj	bio	code	en	custom	incoder-1B
150	ideal_gas	0	0.05	incoder/facebook/incoder-1B	python	python	genchem	code	ch	custom	incoder-1B
151	ideal_gas	0	0.05	incoder/facebook/incoder-1B	python	python	thermo	code	ch	custom	incoder-1B
152	ideal_gas	0	0.05	incoder/facebook/incoder-1B	python	python	genchem	code	ch	custom	incoder-1B
153	ideal_gas	0	0.05	incoder/facebook/incoder-1B	python	python	thermo	code	ch	custom	incoder-1B
154	ideal_gas	0	0.05	incoder/facebook/incoder-1B	python	python	genchem	code	ch	custom	incoder-1B
155	ideal_gas	0	0.05	incoder/facebook/incoder-1B	python	python	thermo	code	ch	custom	incoder-1B
156	ideal_gas	0	0.05	incoder/facebook/incoder-1B	python	python	genchem	code	ch	custom	incoder-1B
157	ideal_gas	0	0.05	incoder/facebook/incoder-1B	python	python	thermo	code	ch	custom	incoder-1B
158	ideal_gas	0	0.05	incoder/facebook/incoder-1B	python	python	genchem	code	ch	custom	incoder-1B
159	ideal_gas	0	0.05	incoder/facebook/incoder-1B	python	python	thermo	code	ch	custom	incoder-1B
160	iupac2smiles	0	0.05	incoder/facebook/incoder-1B	python	rdkit	cheminf	code	ch	custom	incoder-1B
161	iupac2smiles	0	0.05	incoder/facebook/incoder-1B	python	rdkit	cheminf	code	ch	custom	incoder-1B
162	iupac2smiles	0	0.05	incoder/facebook/incoder-1B	python	rdkit	cheminf	code	ch	custom	incoder-1B
163	iupac2smiles	0	0.05	incoder/facebook/incoder-1B	python	rdkit	cheminf	code	ch	custom	incoder-1B
164	iupac2smiles	0	0.05	incoder/facebook/incoder-1B	python	rdkit	cheminf	code	ch	custom	incoder-1B
165	karplusant	0	0.05	incoder/facebook/incoder-1B	python	numpy	spectroscopy	code	en	custom	incoder-1B
166	karplusant	0	0.05	incoder/facebook/incoder-1B	python	numpy	spectroscopy	code	en	custom	incoder-1B
167	karplusant	0	0.05	incoder/facebook/incoder-1B	python	numpy	spectroscopy	code	en	custom	incoder-1B
168	karplusant	0	0.05	incoder/facebook/incoder-1B	python	numpy	spectroscopy	code	en	custom	incoder-1B
169	karplusant	0	0.05	incoder/facebook/incoder-1B	python	numpy	spectroscopy	code	en	custom	incoder-1B
170	kld	0	0.05	incoder/facebook/incoder-1B	python	numpy	stats	code	en	custom	incoder-1B
171	kld	0	0.05	incoder/facebook/incoder-1B	python	numpy	stats	code	en	custom	incoder-1B
172	kld	0	0.05	incoder/facebook/incoder-1B	python	numpy	stats	code	en	custom	incoder-1B
173	kld	0	0.05	incoder/facebook/incoder-1B	python	numpy	stats	code	en	custom	incoder-1B
174	kld	0	0.05	incoder/facebook/incoder-1B	python	numpy	stats	code	en	custom	incoder-1B
175	langevin_dynamics	0	0.05	incoder/facebook/incoder-1B	python	numpy	sim	code	en	custom	incoder-1B
176	langevin_dynamics	0	0.05	incoder/facebook/incoder-1B	python	numpy	sim	code	en	custom	incoder-1B
177	langevin_dynamics	0	0.05	incoder/facebook/incoder-1B	python	numpy	sim	code	en	custom	incoder-1B
178	langevin_dynamics	0	0.05	incoder/facebook/incoder-1B	python	numpy	sim	code	en	custom	incoder-1B
179	langevin_dynamics	0	0.05	incoder/facebook/incoder-1B	python	numpy	sim	code	en	custom	incoder-1B
180	weighted-least-squares	0	0.05	incoder/facebook/incoder-1B	python	numpy	stats	code	en	custom	incoder-1B
181	weighted-least-squares	0	0.05	incoder/facebook/incoder-1B	python	numpy	stats	code	en	custom	incoder-1B
182	weighted-least-squares	0	0.05	incoder/facebook/incoder-1B	python	numpy	stats	code	en	custom	incoder-1B
183	weighted-least-squares	0	0.05	incoder/facebook/incoder-1B	python	numpy	stats	code	en	custom	incoder-1B
184	weighted-least-squares	0	0.05	incoder/facebook/incoder-1B	python	numpy	stats	code	en	custom	incoder-1B
185	lipinski_rule_of_five	0	0.05	incoder/facebook/incoder-1B	python	rdkit	cheminf	code	ch	custom	incoder-1B
186	lipinski_rule_of_five	0	0.05	incoder/facebook/incoder-1B	python	rdkit	cheminf	code	ch	custom	incoder-1B
187	lipinski_rule_of_five	0	0.05	incoder/facebook/incoder-1B	python	rdkit	cheminf	code	ch	custom	incoder-1B
188	lipinski_rule_of_five	0	0.05	incoder/facebook/incoder-1B	python	rdkit	cheminf	code	ch	custom	incoder-1B
189	lipinski_rule_of_five	0	0.05	incoder/facebook/incoder-1B	python	rdkit	cheminf	code	ch	custom	incoder-1B
190	mape	0	0.05	incoder/facebook/incoder-1B	python	python	stats	code	en	custom	incoder-1B
191	mape	0	0.05	incoder/facebook/incoder-1B	python	python	stats	code	en	custom	incoder-1B
192	mape	0	0.05	incoder/facebook/incoder-1B	python	python	stats	code	en	custom	incoder-1B
193	mape	0	0.05	incoder/facebook/incoder-1B	python	python	stats	code	en	custom	incoder-1B
194	mape	0	0.05	incoder/facebook/incoder-1B	python	python	stats	code	en	custom	incoder-1B
195	mapping_operator	0	0.05	incoder/facebook/incoder-1B	python	MDAnalysis	md	code	en	custom	incoder-1B
196	mapping_operator	0	0.05	incoder/facebook/incoder-1B	python	MDAnalysis	md	code	en	custom	incoder-1B
197	mapping_operator	0	0.05	incoder/facebook/incoder-1B	python	MDAnalysis	md	code	en	custom	incoder-1B
198	mapping_operator	0	0.05	incoder/facebook/incoder-1B	python	MDAnalysis	md	code	en	custom	incoder-1B
199	mapping_operator	0	0.05	incoder/facebook/incoder-1B	python	MDAnalysis	md	code	en	custom	incoder-1B
200	max-boltz	0	0.05	incoder/facebook/incoder-1B	python	python	genchem	code	ch	custom	incoder-1B
201	max-boltz	0	0.05	incoder/facebook/incoder-1B	python	python	thermo	code	ch	custom	incoder-1B
202	max-boltz	0	0.05	incoder/facebook/incoder-1B	python	python	genchem	code	ch	custom	incoder-1B
203	max-boltz	0	0.05	incoder/facebook/incoder-1B	python	python	thermo	code	ch	custom	incoder-1B
204	max-boltz	0	0.05	incoder/facebook/incoder-1B	python	python	genchem	code	ch	custom	incoder-1B
205	max-boltz	0	0.05	incoder/facebook/incoder-1B	python	python	thermo	code	ch	custom	incoder-1B
206	max-boltz	0	0.05	incoder/facebook/incoder-1B	python	python	genchem	code	ch	custom	incoder-1B
207	max-boltz	0	0.05	incoder/facebook/incoder-1B	python	python	thermo	code	ch	custom	incoder-1B
208	max-boltz	0	0.05	incoder/facebook/incoder-1B	python	python	genchem	code	ch	custom	incoder-1B
209	max-boltz	0	0.05	incoder/facebook/incoder-1B	python	python	thermo	code	ch	custom	incoder-1B
210	mc_harmonic	1	0.05	incoder/facebook/incoder-1B	python	numpy	sim	human	en	custom	incoder-1B
211	mc_harmonic	1	0.05	incoder/facebook/incoder-1B	python	numpy	sim	human	en	custom	incoder-1B
212	mc_harmonic	1	0.05	incoder/facebook/incoder-1B	python	numpy	sim	human	en	custom	incoder-1B
213	mc_harmonic	0	0.05	incoder/facebook/incoder-1B	python	numpy	sim	human	en	custom	incoder-1B
214	mc_harmonic	1	0.05	incoder/facebook/incoder-1B	python	numpy	sim	human	en	custom	incoder-1B
215	mc_ising	1	0.05	incoder/facebook/incoder-1B	python	numpy	sim	human	en	custom	incoder-1B
216	mc_ising	1	0.05	incoder/facebook/incoder-1B	python	numpy	sim	human	en	custom	incoder-1B
217	mc_ising	1	0.05	incoder/facebook/incoder-1B	python	numpy	sim	human	en	custom	incoder-1B
218	mc_ising	1	0.05	incoder/facebook/incoder-1B	python	numpy	sim	human	en	custom	incoder-1B
219	mc_ising	1	0.05	incoder/facebook/incoder-1B	python	numpy	sim	human	en	custom	incoder-1B
220	michaelis	0	0.05	incoder/facebook/incoder-1B	python	python	bio	code	en	custom	incoder-1B
221	michaelis	0	0.05	incoder/facebook/incoder-1B	python	python	thermo	code	en	custom	incoder-1B
222	michaelis	0	0.05	incoder/facebook/incoder-1B	python	python	bio	code	en	custom	incoder-1B
223	michaelis	0	0.05	incoder/facebook/incoder-1B	python	python	thermo	code	en	custom	incoder-1B
224	michaelis	0	0.05	incoder/facebook/incoder-1B	python	python	bio	code	en	custom	incoder-1B
225	michaelis	0	0.05	incoder/facebook/incoder-1B	python	python	thermo	code	en	custom	incoder-1B
226	michaelis	0	0.05	incoder/facebook/incoder-1B	python	python	bio	code	en	custom	incoder-1B
227	michaelis	0	0.05	incoder/facebook/incoder-1B	python	python	thermo	code	en	custom	incoder-1B
228	michaelis	0	0.05	incoder/facebook/incoder-1B	python	python	bio	code	en	custom	incoder-1B
229	michaelis	0	0.05	incoder/facebook/incoder-1B	python	python	thermo	code	en	custom	incoder-1B
230	mol_charge	1	0.05	incoder/facebook/incoder-1B	python	rdkit	cheminf	code	ch	custom	incoder-1B
231	mol_charge	1	0.05	incoder/facebook/incoder-1B	python	rdkit	cheminf	code	ch	custom	incoder-1B
232	mol_charge	1	0.05	incoder/facebook/incoder-1B	python	rdkit	cheminf	code	ch	custom	incoder-1B
233	mol_charge	1	0.05	incoder/facebook/incoder-1B	python	rdkit	cheminf	code	ch	custom	incoder-1B
234	mol_charge	1	0.05	incoder/facebook/incoder-1B	python	rdkit	cheminf	code	ch	custom	incoder-1B
235	net_charge	0	0.05	incoder/facebook/incoder-1B	python	python	bio	code	en	custom	incoder-1B
236	net_charge	0	0.05	incoder/facebook/incoder-1B	python	python	bio	code	en	custom	incoder-1B
237	net_charge	0	0.05	incoder/facebook/incoder-1B	python	python	bio	code	en	custom	incoder-1B
238	net_charge	0	0.05	incoder/facebook/incoder-1B	python	python	bio	code	en	custom	incoder-1B
239	net_charge	0	0.05	incoder/facebook/incoder-1B	python	python	bio	code	en	custom	incoder-1B
240	nwchem_input_emin	0	0.05	incoder/facebook/incoder-1B	python	python	qm	human	en	custom	incoder-1B
241	nwchem_input_emin	1	0.05	incoder/facebook/incoder-1B	python	python	qm	human	en	custom	incoder-1B
242	nwchem_input_emin	1	0.05	incoder/facebook/incoder-1B	python	python	qm	human	en	custom	incoder-1B
243	nwchem_input_emin	1	0.05	incoder/facebook/incoder-1B	python	python	qm	human	en	custom	incoder-1B
244	nwchem_input_emin	1	0.05	incoder/facebook/incoder-1B	python	python	qm	human	en	custom	incoder-1B
245	ohe	0	0.05	incoder/facebook/incoder-1B	python	numpy	stats	code	en	custom	incoder-1B
246	ohe	0	0.05	incoder/facebook/incoder-1B	python	numpy	stats	code	en	custom	incoder-1B
247	ohe	0	0.05	incoder/facebook/incoder-1B	python	numpy	stats	code	en	custom	incoder-1B
248	ohe	0	0.05	incoder/facebook/incoder-1B	python	numpy	stats	code	en	custom	incoder-1B
249	ohe	0	0.05	incoder/facebook/incoder-1B	python	numpy	stats	code	en	custom	incoder-1B
250	osmotic_pressure	0	0.05	incoder/facebook/incoder-1B	python	python	genchem	code	ch	custom	incoder-1B
251	osmotic_pressure	1	0.05	incoder/facebook/incoder-1B	python	python	genchem	code	ch	custom	incoder-1B
252	osmotic_pressure	0	0.05	incoder/facebook/incoder-1B	python	python	genchem	code	ch	custom	incoder-1B
253	osmotic_pressure	1	0.05	incoder/facebook/incoder-1B	python	python	genchem	code	ch	custom	incoder-1B
254	osmotic_pressure	0	0.05	incoder/facebook/incoder-1B	python	python	genchem	code	ch	custom	incoder-1B
255	pair_wise	0	0.05	incoder/facebook/incoder-1B	python	mdtraj	md	code	en	custom	incoder-1B
256	pair_wise	0	0.05	incoder/facebook/incoder-1B	python	mdtraj	bio	code	en	custom	incoder-1B
257	pair_wise	0	0.05	incoder/facebook/incoder-1B	python	mdtraj	md	code	en	custom	incoder-1B
258	pair_wise	0	0.05	incoder/facebook/incoder-1B	python	mdtraj	bio	code	en	custom	incoder-1B
259	pair_wise	0	0.05	incoder/facebook/incoder-1B	python	mdtraj	md	code	en	custom	incoder-1B
260	pair_wise	0	0.05	incoder/facebook/incoder-1B	python	mdtraj	bio	code	en	custom	incoder-1B
261	pair_wise	0	0.05	incoder/facebook/incoder-1B	python	mdtraj	md	code	en	custom	incoder-1B
262	pair_wise	0	0.05	incoder/facebook/incoder-1B	python	mdtraj	bio	code	en	custom	incoder-1B
263	pair_wise	0	0.05	incoder/facebook/incoder-1B	python	mdtraj	md	code	en	custom	incoder-1B
264	pair_wise	0	0.05	incoder/facebook/incoder-1B	python	mdtraj	bio	code	en	custom	incoder-1B
265	pauli_matrices	0	0.05	incoder/facebook/incoder-1B	python	numpy	qm	code	en	custom	incoder-1B
266	pauli_matrices	0	0.05	incoder/facebook/incoder-1B	python	numpy	qm	code	en	custom	incoder-1B
267	pauli_matrices	0	0.05	incoder/facebook/incoder-1B	python	numpy	qm	code	en	custom	incoder-1B
268	pauli_matrices	0	0.05	incoder/facebook/incoder-1B	python	numpy	qm	code	en	custom	incoder-1B
269	pauli_matrices	0	0.05	incoder/facebook/incoder-1B	python	numpy	qm	code	en	custom	incoder-1B
270	pib_1d	0	0.05	incoder/facebook/incoder-1B	python	python	qm	code	en	custom	incoder-1B
271	pib_1d	0	0.05	incoder/facebook/incoder-1B	python	python	qm	code	en	custom	incoder-1B
272	pib_1d	0	0.05	incoder/facebook/incoder-1B	python	python	qm	code	en	custom	incoder-1B
273	pib_1d	0	0.05	incoder/facebook/incoder-1B	python	python	qm	code	en	custom	incoder-1B
274	pib_1d	0	0.05	incoder/facebook/incoder-1B	python	python	qm	code	en	custom	incoder-1B
275	pi	0	0.05	incoder/facebook/incoder-1B	python	numpy	stats	code	en	custom	incoder-1B
276	pi	0	0.05	incoder/facebook/incoder-1B	python	numpy	stats	code	en	custom	incoder-1B
277	pi	0	0.05	incoder/facebook/incoder-1B	python	numpy	stats	code	en	custom	incoder-1B
278	pi	0	0.05	incoder/facebook/incoder-1B	python	numpy	stats	code	en	custom	incoder-1B
279	pi	0	0.05	incoder/facebook/incoder-1B	python	numpy	stats	code	en	custom	incoder-1B
280	plot_3d_sin	1	0.05	incoder/facebook/incoder-1B	python	matplotlib	plot	human	en	custom	incoder-1B
281	plot_3d_sin	1	0.05	incoder/facebook/incoder-1B	python	matplotlib	plot	human	en	custom	incoder-1B
282	plot_3d_sin	1	0.05	incoder/facebook/incoder-1B	python	matplotlib	plot	human	en	custom	incoder-1B
283	plot_3d_sin	1	0.05	incoder/facebook/incoder-1B	python	matplotlib	plot	human	en	custom	incoder-1B
284	plot_3d_sin	1	0.05	incoder/facebook/incoder-1B	python	matplotlib	plot	human	en	custom	incoder-1B
285	plot_bar	1	0.05	incoder/facebook/incoder-1B	python	matplotlib	plot	human	en	custom	incoder-1B
286	plot_bar	1	0.05	incoder/facebook/incoder-1B	python	matplotlib	plot	human	en	custom	incoder-1B
287	plot_bar	1	0.05	incoder/facebook/incoder-1B	python	matplotlib	plot	human	en	custom	incoder-1B
288	plot_bar	1	0.05	incoder/facebook/incoder-1B	python	matplotlib	plot	human	en	custom	incoder-1B
289	plot_bar	1	0.05	incoder/facebook/incoder-1B	python	matplotlib	plot	human	en	custom	incoder-1B
290	plot_contour	1	0.05	incoder/facebook/incoder-1B	python	matplotlib	plot	human	en	custom	incoder-1B
291	plot_contour	1	0.05	incoder/facebook/incoder-1B	python	matplotlib	plot	human	en	custom	incoder-1B
292	plot_contour	1	0.05	incoder/facebook/incoder-1B	python	matplotlib	plot	human	en	custom	incoder-1B
293	plot_contour	1	0.05	incoder/facebook/incoder-1B	python	matplotlib	plot	human	en	custom	incoder-1B
294	plot_contour	1	0.05	incoder/facebook/incoder-1B	python	matplotlib	plot	human	en	custom	incoder-1B
295	plot_correlation	1	0.05	incoder/facebook/incoder-1B	python	matplotlib	plot	human	en	custom	incoder-1B
296	plot_correlation	1	0.05	incoder/facebook/incoder-1B	python	matplotlib	plot	human	en	custom	incoder-1B
297	plot_correlation	1	0.05	incoder/facebook/incoder-1B	python	matplotlib	plot	human	en	custom	incoder-1B
298	plot_correlation	0	0.05	incoder/facebook/incoder-1B	python	matplotlib	plot	human	en	custom	incoder-1B
299	plot_correlation	1	0.05	incoder/facebook/incoder-1B	python	matplotlib	plot	human	en	custom	incoder-1B
300	plot_dual_axis	1	0.05	incoder/facebook/incoder-1B	python	matplotlib	plot	human	en	custom	incoder-1B
301	plot_dual_axis	1	0.05	incoder/facebook/incoder-1B	python	matplotlib	plot	human	en	custom	incoder-1B
302	plot_dual_axis	1	0.05	incoder/facebook/incoder-1B	python	matplotlib	plot	human	en	custom	incoder-1B
303	plot_dual_axis	0	0.05	incoder/facebook/incoder-1B	python	matplotlib	plot	human	en	custom	incoder-1B
304	plot_dual_axis	1	0.05	incoder/facebook/incoder-1B	python	matplotlib	plot	human	en	custom	incoder-1B
305	plot_emoji	1	0.05	incoder/facebook/incoder-1B	python	matplotlib	plot	human	en	custom	incoder-1B
306	plot_emoji	0	0.05	incoder/facebook/incoder-1B	python	matplotlib	plot	human	en	custom	incoder-1B
307	plot_emoji	0	0.05	incoder/facebook/incoder-1B	python	matplotlib	plot	human	en	custom	incoder-1B
308	plot_emoji	0	0.05	incoder/facebook/incoder-1B	python	matplotlib	plot	human	en	custom	incoder-1B
309	plot_emoji	0	0.05	incoder/facebook/incoder-1B	python	matplotlib	plot	human	en	custom	incoder-1B
310	plot_outside_legend	1	0.05	incoder/facebook/incoder-1B	python	matplotlib	plot	human	en	custom	incoder-1B
311	plot_outside_legend	1	0.05	incoder/facebook/incoder-1B	python	matplotlib	plot	human	en	custom	incoder-1B
312	plot_outside_legend	1	0.05	incoder/facebook/incoder-1B	python	matplotlib	plot	human	en	custom	incoder-1B
313	plot_outside_legend	1	0.05	incoder/facebook/incoder-1B	python	matplotlib	plot	human	en	custom	incoder-1B
314	plot_outside_legend	1	0.05	incoder/facebook/incoder-1B	python	matplotlib	plot	human	en	custom	incoder-1B
315	plot_pointsize	0	0.05	incoder/facebook/incoder-1B	python	matplotlib	plot	human	en	custom	incoder-1B
316	plot_pointsize	0	0.05	incoder/facebook/incoder-1B	python	matplotlib	plot	human	en	custom	incoder-1B
317	plot_pointsize	0	0.05	incoder/facebook/incoder-1B	python	matplotlib	plot	human	en	custom	incoder-1B
318	plot_pointsize	0	0.05	incoder/facebook/incoder-1B	python	matplotlib	plot	human	en	custom	incoder-1B
319	plot_pointsize	1	0.05	incoder/facebook/incoder-1B	python	matplotlib	plot	human	en	custom	incoder-1B
320	plot_sin	1	0.05	incoder/facebook/incoder-1B	python	matplotlib	plot	human	en	custom	incoder-1B
321	plot_sin	1	0.05	incoder/facebook/incoder-1B	python	matplotlib	plot	human	en	custom	incoder-1B
322	plot_sin	1	0.05	incoder/facebook/incoder-1B	python	matplotlib	plot	human	en	custom	incoder-1B
323	plot_sin	1	0.05	incoder/facebook/incoder-1B	python	matplotlib	plot	human	en	custom	incoder-1B
324	plot_sin	1	0.05	incoder/facebook/incoder-1B	python	matplotlib	plot	human	en	custom	incoder-1B
325	plot_sin_polar	1	0.05	incoder/facebook/incoder-1B	python	matplotlib	plot	human	en	custom	incoder-1B
326	plot_sin_polar	1	0.05	incoder/facebook/incoder-1B	python	matplotlib	plot	human	en	custom	incoder-1B
327	plot_sin_polar	1	0.05	incoder/facebook/incoder-1B	python	matplotlib	plot	human	en	custom	incoder-1B
328	plot_sin_polar	1	0.05	incoder/facebook/incoder-1B	python	matplotlib	plot	human	en	custom	incoder-1B
329	plot_sin_polar	1	0.05	incoder/facebook/incoder-1B	python	matplotlib	plot	human	en	custom	incoder-1B
330	pred_interval	0	0.05	incoder/facebook/incoder-1B	python	numpy	stats	code	en	custom	incoder-1B
331	pred_interval	0	0.05	incoder/facebook/incoder-1B	python	numpy	stats	code	en	custom	incoder-1B
332	pred_interval	0	0.05	incoder/facebook/incoder-1B	python	numpy	stats	code	en	custom	incoder-1B
333	pred_interval	0	0.05	incoder/facebook/incoder-1B	python	numpy	stats	code	en	custom	incoder-1B
334	pred_interval	0	0.05	incoder/facebook/incoder-1B	python	numpy	stats	code	en	custom	incoder-1B
335	protein-render	0	0.05	incoder/facebook/incoder-1B	python	mdtraj	bio	human	en	custom	incoder-1B
336	protein-render	0	0.05	incoder/facebook/incoder-1B	python	mdtraj	bio	human	en	custom	incoder-1B
337	protein-render	0	0.05	incoder/facebook/incoder-1B	python	mdtraj	bio	human	en	custom	incoder-1B
338	protein-render	0	0.05	incoder/facebook/incoder-1B	python	mdtraj	bio	human	en	custom	incoder-1B
339	protein-render	0	0.05	incoder/facebook/incoder-1B	python	mdtraj	bio	human	en	custom	incoder-1B
340	pubchem	0	0.05	incoder/facebook/incoder-1B	python	rdkit	cheminf	code	ch	custom	incoder-1B
341	pubchem	0	0.05	incoder/facebook/incoder-1B	python	rdkit	cheminf	code	ch	custom	incoder-1B
342	pubchem	0	0.05	incoder/facebook/incoder-1B	python	rdkit	cheminf	code	ch	custom	incoder-1B
343	pubchem	0	0.05	incoder/facebook/incoder-1B	python	rdkit	cheminf	code	ch	custom	incoder-1B
344	pubchem	0	0.05	incoder/facebook/incoder-1B	python	rdkit	cheminf	code	ch	custom	incoder-1B
345	pyscf_energy	0	0.05	incoder/facebook/incoder-1B	python	pyscf	qm	code	en	custom	incoder-1B
346	pyscf_energy	0	0.05	incoder/facebook/incoder-1B	python	pyscf	qm	code	en	custom	incoder-1B
347	pyscf_energy	0	0.05	incoder/facebook/incoder-1B	python	pyscf	qm	code	en	custom	incoder-1B
348	pyscf_energy	0	0.05	incoder/facebook/incoder-1B	python	pyscf	qm	code	en	custom	incoder-1B
349	pyscf_energy	0	0.05	incoder/facebook/incoder-1B	python	pyscf	qm	code	en	custom	incoder-1B
350	qed	0	0.05	incoder/facebook/incoder-1B	python	rdkit	cheminf	code	ch	custom	incoder-1B
351	qed	0	0.05	incoder/facebook/incoder-1B	python	rdkit	cheminf	code	ch	custom	incoder-1B
352	qed	0	0.05	incoder/facebook/incoder-1B	python	rdkit	cheminf	code	ch	custom	incoder-1B
353	qed	0	0.05	incoder/facebook/incoder-1B	python	rdkit	cheminf	code	ch	custom	incoder-1B
354	qed	0	0.05	incoder/facebook/incoder-1B	python	rdkit	cheminf	code	ch	custom	incoder-1B
355	quantile	0	0.05	incoder/facebook/incoder-1B	python	numpy	stats	code	en	custom	incoder-1B
356	quantile	0	0.05	incoder/facebook/incoder-1B	python	numpy	stats	code	en	custom	incoder-1B
357	quantile	0	0.05	incoder/facebook/incoder-1B	python	numpy	stats	code	en	custom	incoder-1B
358	quantile	0	0.05	incoder/facebook/incoder-1B	python	numpy	stats	code	en	custom	incoder-1B
359	quantile	0	0.05	incoder/facebook/incoder-1B	python	numpy	stats	code	en	custom	incoder-1B
360	random_walk	0	0.05	incoder/facebook/incoder-1B	python	numpy	sim	code	en	custom	incoder-1B
361	random_walk	0	0.05	incoder/facebook/incoder-1B	python	numpy	stats	code	en	custom	incoder-1B
362	random_walk	0	0.05	incoder/facebook/incoder-1B	python	numpy	sim	code	en	custom	incoder-1B
363	random_walk	0	0.05	incoder/facebook/incoder-1B	python	numpy	stats	code	en	custom	incoder-1B
364	random_walk	0	0.05	incoder/facebook/incoder-1B	python	numpy	sim	code	en	custom	incoder-1B
365	random_walk	0	0.05	incoder/facebook/incoder-1B	python	numpy	stats	code	en	custom	incoder-1B
366	random_walk	0	0.05	incoder/facebook/incoder-1B	python	numpy	sim	code	en	custom	incoder-1B
367	random_walk	0	0.05	incoder/facebook/incoder-1B	python	numpy	stats	code	en	custom	incoder-1B
368	random_walk	0	0.05	incoder/facebook/incoder-1B	python	numpy	sim	code	en	custom	incoder-1B
369	random_walk	0	0.05	incoder/facebook/incoder-1B	python	numpy	stats	code	en	custom	incoder-1B
370	remove-water	0	0.05	incoder/facebook/incoder-1B	python	mdtraj	md	code	en	custom	incoder-1B
371	remove-water	0	0.05	incoder/facebook/incoder-1B	python	mdtraj	md	code	en	custom	incoder-1B
372	remove-water	0	0.05	incoder/facebook/incoder-1B	python	mdtraj	md	code	en	custom	incoder-1B
373	remove-water	0	0.05	incoder/facebook/incoder-1B	python	mdtraj	md	code	en	custom	incoder-1B
374	remove-water	0	0.05	incoder/facebook/incoder-1B	python	mdtraj	md	code	en	custom	incoder-1B
375	rmse	0	0.05	incoder/facebook/incoder-1B	python	numpy	stats	code	en	custom	incoder-1B
376	rmse	0	0.05	incoder/facebook/incoder-1B	python	numpy	stats	code	en	custom	incoder-1B
377	rmse	0	0.05	incoder/facebook/incoder-1B	python	numpy	stats	code	en	custom	incoder-1B
378	rmse	0	0.05	incoder/facebook/incoder-1B	python	numpy	stats	code	en	custom	incoder-1B
379	rmse	0	0.05	incoder/facebook/incoder-1B	python	numpy	stats	code	en	custom	incoder-1B
380	rms_velocity	0	0.05	incoder/facebook/incoder-1B	python	python	thermo	code	en	custom	incoder-1B
381	rms_velocity	0	0.05	incoder/facebook/incoder-1B	python	python	thermo	code	en	custom	incoder-1B
382	rms_velocity	0	0.05	incoder/facebook/incoder-1B	python	python	thermo	code	en	custom	incoder-1B
383	rms_velocity	0	0.05	incoder/facebook/incoder-1B	python	python	thermo	code	en	custom	incoder-1B
384	rms_velocity	0	0.05	incoder/facebook/incoder-1B	python	python	thermo	code	en	custom	incoder-1B
385	rog	0	0.05	incoder/facebook/incoder-1B	python	mdtraj	md	code	en	custom	incoder-1B
386	rog	0	0.05	incoder/facebook/incoder-1B	python	mdtraj	bio	code	en	custom	incoder-1B
387	rog	0	0.05	incoder/facebook/incoder-1B	python	mdtraj	md	code	en	custom	incoder-1B
388	rog	0	0.05	incoder/facebook/incoder-1B	python	mdtraj	bio	code	en	custom	incoder-1B
389	rog	0	0.05	incoder/facebook/incoder-1B	python	mdtraj	md	code	en	custom	incoder-1B
390	rog	0	0.05	incoder/facebook/incoder-1B	python	mdtraj	bio	code	en	custom	incoder-1B
391	rog	0	0.05	incoder/facebook/incoder-1B	python	mdtraj	md	code	en	custom	incoder-1B
392	rog	0	0.05	incoder/facebook/incoder-1B	python	mdtraj	bio	code	en	custom	incoder-1B
393	rog	0	0.05	incoder/facebook/incoder-1B	python	mdtraj	md	code	en	custom	incoder-1B
394	rog	0	0.05	incoder/facebook/incoder-1B	python	mdtraj	bio	code	en	custom	incoder-1B
395	rotationant	0	0.05	incoder/facebook/incoder-1B	python	numpy	spectroscopy	code	en	custom	incoder-1B
396	rotationant	0	0.05	incoder/facebook/incoder-1B	python	numpy	spectroscopy	code	en	custom	incoder-1B
397	rotationant	0	0.05	incoder/facebook/incoder-1B	python	numpy	spectroscopy	code	en	custom	incoder-1B
398	rotationant	0	0.05	incoder/facebook/incoder-1B	python	numpy	spectroscopy	code	en	custom	incoder-1B
399	rotationant	0	0.05	incoder/facebook/incoder-1B	python	numpy	spectroscopy	code	en	custom	incoder-1B
400	rotation_higherant	0	0.05	incoder/facebook/incoder-1B	python	numpy	spectroscopy	code	en	custom	incoder-1B
401	rotation_higherant	0	0.05	incoder/facebook/incoder-1B	python	numpy	spectroscopy	code	en	custom	incoder-1B
402	rotation_higherant	0	0.05	incoder/facebook/incoder-1B	python	numpy	spectroscopy	code	en	custom	incoder-1B
403	rotation_higherant	0	0.05	incoder/facebook/incoder-1B	python	numpy	spectroscopy	code	en	custom	incoder-1B
404	rotation_higherant	0	0.05	incoder/facebook/incoder-1B	python	numpy	spectroscopy	code	en	custom	incoder-1B
405	sasa	0	0.05	incoder/facebook/incoder-1B	python	mdtraj	md	code	en	custom	incoder-1B
406	sasa	0	0.05	incoder/facebook/incoder-1B	python	mdtraj	bio	code	en	custom	incoder-1B
407	sasa	0	0.05	incoder/facebook/incoder-1B	python	mdtraj	md	code	en	custom	incoder-1B
408	sasa	0	0.05	incoder/facebook/incoder-1B	python	mdtraj	bio	code	en	custom	incoder-1B
409	sasa	0	0.05	incoder/facebook/incoder-1B	python	mdtraj	md	code	en	custom	incoder-1B
410	sasa	0	0.05	incoder/facebook/incoder-1B	python	mdtraj	bio	code	en	custom	incoder-1B
411	sasa	0	0.05	incoder/facebook/incoder-1B	python	mdtraj	md	code	en	custom	incoder-1B
412	sasa	0	0.05	incoder/facebook/incoder-1B	python	mdtraj	bio	code	en	custom	incoder-1B
413	sasa	0	0.05	incoder/facebook/incoder-1B	python	mdtraj	md	code	en	custom	incoder-1B
414	sasa	0	0.05	incoder/facebook/incoder-1B	python	mdtraj	bio	code	en	custom	incoder-1B
415	scaffold	0	0.05	incoder/facebook/incoder-1B	python	rdkit	cheminf	code	ch	custom	incoder-1B
416	scaffold	0	0.05	incoder/facebook/incoder-1B	python	rdkit	cheminf	code	ch	custom	incoder-1B
417	scaffold	0	0.05	incoder/facebook/incoder-1B	python	rdkit	cheminf	code	ch	custom	incoder-1B
418	scaffold	0	0.05	incoder/facebook/incoder-1B	python	rdkit	cheminf	code	ch	custom	incoder-1B
419	scaffold	0	0.05	incoder/facebook/incoder-1B	python	rdkit	cheminf	code	ch	custom	incoder-1B
420	seq-align	0	0.05	incoder/facebook/incoder-1B	python	biopython	bio	code	en	custom	incoder-1B
421	seq-align	0	0.05	incoder/facebook/incoder-1B	python	biopython	bio	code	en	custom	incoder-1B
422	seq-align	0	0.05	incoder/facebook/incoder-1B	python	biopython	bio	code	en	custom	incoder-1B
423	seq-align	0	0.05	incoder/facebook/incoder-1B	python	biopython	bio	code	en	custom	incoder-1B
424	seq-align	0	0.05	incoder/facebook/incoder-1B	python	biopython	bio	code	en	custom	incoder-1B
425	seq-trans	0	0.05	incoder/facebook/incoder-1B	python	biopython	bio	code	en	custom	incoder-1B
426	seq-trans	0	0.05	incoder/facebook/incoder-1B	python	biopython	bio	code	en	custom	incoder-1B
427	seq-trans	0	0.05	incoder/facebook/incoder-1B	python	biopython	bio	code	en	custom	incoder-1B
428	seq-trans	0	0.05	incoder/facebook/incoder-1B	python	biopython	bio	code	en	custom	incoder-1B
429	seq-trans	0	0.05	incoder/facebook/incoder-1B	python	biopython	bio	code	en	custom	incoder-1B
430	spectral_r	0	0.05	incoder/facebook/incoder-1B	python	numpy	stats	code	en	custom	incoder-1B
431	spectral_r	0	0.05	incoder/facebook/incoder-1B	python	numpy	stats	code	en	custom	incoder-1B
432	spectral_r	0	0.05	incoder/facebook/incoder-1B	python	numpy	stats	code	en	custom	incoder-1B
433	spectral_r	0	0.05	incoder/facebook/incoder-1B	python	numpy	stats	code	en	custom	incoder-1B
434	spectral_r	0	0.05	incoder/facebook/incoder-1B	python	numpy	stats	code	en	custom	incoder-1B
435	find_peaks	0	0.05	incoder/facebook/incoder-1B	python	scipy	spectroscopy	code	en	custom	incoder-1B
436	find_peaks	0	0.05	incoder/facebook/incoder-1B	python	scipy	spectroscopy	code	en	custom	incoder-1B
437	find_peaks	0	0.05	incoder/facebook/incoder-1B	python	scipy	spectroscopy	code	en	custom	incoder-1B
438	find_peaks	0	0.05	incoder/facebook/incoder-1B	python	scipy	spectroscopy	code	en	custom	incoder-1B
439	find_peaks	0	0.05	incoder/facebook/incoder-1B	python	scipy	spectroscopy	code	en	custom	incoder-1B
440	speed_of_sound	0	0.05	incoder/facebook/incoder-1B	python	python	thermo	code	en	custom	incoder-1B
441	speed_of_sound	0	0.05	incoder/facebook/incoder-1B	python	python	thermo	code	en	custom	incoder-1B
442	speed_of_sound	0	0.05	incoder/facebook/incoder-1B	python	python	thermo	code	en	custom	incoder-1B
443	speed_of_sound	0	0.05	incoder/facebook/incoder-1B	python	python	thermo	code	en	custom	incoder-1B
444	speed_of_sound	0	0.05	incoder/facebook/incoder-1B	python	python	thermo	code	en	custom	incoder-1B
445	substructure	0	0.05	incoder/facebook/incoder-1B	python	rdkit	cheminf	code	ch	custom	incoder-1B
446	substructure	0	0.05	incoder/facebook/incoder-1B	python	rdkit	cheminf	code	ch	custom	incoder-1B
447	substructure	0	0.05	incoder/facebook/incoder-1B	python	rdkit	cheminf	code	ch	custom	incoder-1B
448	substructure	0	0.05	incoder/facebook/incoder-1B	python	rdkit	cheminf	code	ch	custom	incoder-1B
449	substructure	0	0.05	incoder/facebook/incoder-1B	python	rdkit	cheminf	code	ch	custom	incoder-1B
450	tanimoto	0	0.05	incoder/facebook/incoder-1B	python	rdkit	cheminf	code	ch	custom	incoder-1B
451	tanimoto	0	0.05	incoder/facebook/incoder-1B	python	rdkit	cheminf	code	ch	custom	incoder-1B
452	tanimoto	0	0.05	incoder/facebook/incoder-1B	python	rdkit	cheminf	code	ch	custom	incoder-1B
453	tanimoto	0	0.05	incoder/facebook/incoder-1B	python	rdkit	cheminf	code	ch	custom	incoder-1B
454	tanimoto	0	0.05	incoder/facebook/incoder-1B	python	rdkit	cheminf	code	ch	custom	incoder-1B
455	unbdistance	0	0.05	incoder/facebook/incoder-1B	python	mdtraj	md	code	en	custom	incoder-1B
456	unbdistance	0	0.05	incoder/facebook/incoder-1B	python	mdtraj	md	code	en	custom	incoder-1B
457	unbdistance	0	0.05	incoder/facebook/incoder-1B	python	mdtraj	md	code	en	custom	incoder-1B
458	unbdistance	0	0.05	incoder/facebook/incoder-1B	python	mdtraj	md	code	en	custom	incoder-1B
459	unbdistance	0	0.05	incoder/facebook/incoder-1B	python	mdtraj	md	code	en	custom	incoder-1B
460	velocity_verlet_integration	0	0.05	incoder/facebook/incoder-1B	python	numpy	sim	code	en	custom	incoder-1B
461	velocity_verlet_integration	0	0.05	incoder/facebook/incoder-1B	python	numpy	sim	code	en	custom	incoder-1B
462	velocity_verlet_integration	0	0.05	incoder/facebook/incoder-1B	python	numpy	sim	code	en	custom	incoder-1B
463	velocity_verlet_integration	0	0.05	incoder/facebook/incoder-1B	python	numpy	sim	code	en	custom	incoder-1B
464	velocity_verlet_integration	0	0.05	incoder/facebook/incoder-1B	python	numpy	sim	code	en	custom	incoder-1B
0	aa_polarity	0	0.05	incoder/facebook/incoder-1B	python	python-insert	bio	code	en	insert	incoder-1B
1	aa_polarity	0	0.05	incoder/facebook/incoder-1B	python	python-insert	bio	code	en	insert	incoder-1B
2	aa_polarity	0	0.05	incoder/facebook/incoder-1B	python	python-insert	bio	code	en	insert	incoder-1B
3	aa_polarity	0	0.05	incoder/facebook/incoder-1B	python	python-insert	bio	code	en	insert	incoder-1B
4	aa_polarity	0	0.05	incoder/facebook/incoder-1B	python	python-insert	bio	code	en	insert	incoder-1B
5	adiabatic_expansion	0	0.05	incoder/facebook/incoder-1B	python	python-insert	thermo	code	en	insert	incoder-1B
6	adiabatic_expansion	0	0.05	incoder/facebook/incoder-1B	python	python-insert	thermo	code	en	insert	incoder-1B
7	adiabatic_expansion	0	0.05	incoder/facebook/incoder-1B	python	python-insert	thermo	code	en	insert	incoder-1B
8	adiabatic_expansion	0	0.05	incoder/facebook/incoder-1B	python	python-insert	thermo	code	en	insert	incoder-1B
9	adiabatic_expansion	0	0.05	incoder/facebook/incoder-1B	python	python-insert	thermo	code	en	insert	incoder-1B
10	alignment	0	0.05	incoder/facebook/incoder-1B	python	mdtraj-insert	md	code	en	insert	incoder-1B
11	alignment	0	0.05	incoder/facebook/incoder-1B	python	mdtraj-insert	md	code	en	insert	incoder-1B
12	alignment	0	0.05	incoder/facebook/incoder-1B	python	mdtraj-insert	md	code	en	insert	incoder-1B
13	alignment	0	0.05	incoder/facebook/incoder-1B	python	mdtraj-insert	md	code	en	insert	incoder-1B
14	alignment	0	0.05	incoder/facebook/incoder-1B	python	mdtraj-insert	md	code	en	insert	incoder-1B
15	aromatic_aa	0	0.05	incoder/facebook/incoder-1B	python	python-insert	bio	code	en	insert	incoder-1B
16	aromatic_aa	0	0.05	incoder/facebook/incoder-1B	python	python-insert	bio	code	en	insert	incoder-1B
17	aromatic_aa	0	0.05	incoder/facebook/incoder-1B	python	python-insert	bio	code	en	insert	incoder-1B
18	aromatic_aa	0	0.05	incoder/facebook/incoder-1B	python	python-insert	bio	code	en	insert	incoder-1B
19	aromatic_aa	0	0.05	incoder/facebook/incoder-1B	python	python-insert	bio	code	en	insert	incoder-1B
20	arrhenius	0	0.05	incoder/facebook/incoder-1B	python	python-insert	genchem	code	ch	insert	incoder-1B
21	arrhenius	0	0.05	incoder/facebook/incoder-1B	python	python-insert	thermo	code	ch	insert	incoder-1B
22	arrhenius	0	0.05	incoder/facebook/incoder-1B	python	python-insert	genchem	code	ch	insert	incoder-1B
23	arrhenius	0	0.05	incoder/facebook/incoder-1B	python	python-insert	thermo	code	ch	insert	incoder-1B
24	arrhenius	0	0.05	incoder/facebook/incoder-1B	python	python-insert	genchem	code	ch	insert	incoder-1B
25	arrhenius	0	0.05	incoder/facebook/incoder-1B	python	python-insert	thermo	code	ch	insert	incoder-1B
26	arrhenius	0	0.05	incoder/facebook/incoder-1B	python	python-insert	genchem	code	ch	insert	incoder-1B
27	arrhenius	0	0.05	incoder/facebook/incoder-1B	python	python-insert	thermo	code	ch	insert	incoder-1B
28	arrhenius	0	0.05	incoder/facebook/incoder-1B	python	python-insert	genchem	code	ch	insert	incoder-1B
29	arrhenius	0	0.05	incoder/facebook/incoder-1B	python	python-insert	thermo	code	ch	insert	incoder-1B
30	bimolecular	1	0.05	incoder/facebook/incoder-1B	python	python-insert	genchem	code	ch	insert	incoder-1B
31	bimolecular	1	0.05	incoder/facebook/incoder-1B	python	python-insert	genchem	code	ch	insert	incoder-1B
32	bimolecular	0	0.05	incoder/facebook/incoder-1B	python	python-insert	genchem	code	ch	insert	incoder-1B
33	bimolecular	1	0.05	incoder/facebook/incoder-1B	python	python-insert	genchem	code	ch	insert	incoder-1B
34	bimolecular	0	0.05	incoder/facebook/incoder-1B	python	python-insert	genchem	code	ch	insert	incoder-1B
35	bb_rad	0	0.05	incoder/facebook/incoder-1B	python	numpy-insert	spectroscopy	code	en	insert	incoder-1B
36	bb_rad	0	0.05	incoder/facebook/incoder-1B	python	numpy-insert	spectroscopy	code	en	insert	incoder-1B
37	bb_rad	0	0.05	incoder/facebook/incoder-1B	python	numpy-insert	spectroscopy	code	en	insert	incoder-1B
38	bb_rad	0	0.05	incoder/facebook/incoder-1B	python	numpy-insert	spectroscopy	code	en	insert	incoder-1B
39	bb_rad	0	0.05	incoder/facebook/incoder-1B	python	numpy-insert	spectroscopy	code	en	insert	incoder-1B
40	blast	0	0.05	incoder/facebook/incoder-1B	python	requests-insert	bio	code	en	insert	incoder-1B
41	blast	0	0.05	incoder/facebook/incoder-1B	python	requests-insert	bio	code	en	insert	incoder-1B
42	blast	0	0.05	incoder/facebook/incoder-1B	python	requests-insert	bio	code	en	insert	incoder-1B
43	blast	0	0.05	incoder/facebook/incoder-1B	python	requests-insert	bio	code	en	insert	incoder-1B
44	blast	0	0.05	incoder/facebook/incoder-1B	python	requests-insert	bio	code	en	insert	incoder-1B
45	braggant	0	0.05	incoder/facebook/incoder-1B	python	numpy-insert	spectroscopy	code	en	insert	incoder-1B
46	braggant	0	0.05	incoder/facebook/incoder-1B	python	numpy-insert	spectroscopy	code	en	insert	incoder-1B
47	braggant	0	0.05	incoder/facebook/incoder-1B	python	numpy-insert	spectroscopy	code	en	insert	incoder-1B
48	braggant	0	0.05	incoder/facebook/incoder-1B	python	numpy-insert	spectroscopy	code	en	insert	incoder-1B
49	braggant	0	0.05	incoder/facebook/incoder-1B	python	numpy-insert	spectroscopy	code	en	insert	incoder-1B
50	bravais	0	0.05	incoder/facebook/incoder-1B	python	python-insert	spectroscopy	code	en	insert	incoder-1B
51	bravais	0	0.05	incoder/facebook/incoder-1B	python	python-insert	spectroscopy	code	en	insert	incoder-1B
52	bravais	0	0.05	incoder/facebook/incoder-1B	python	python-insert	spectroscopy	code	en	insert	incoder-1B
53	bravais	0	0.05	incoder/facebook/incoder-1B	python	python-insert	spectroscopy	code	en	insert	incoder-1B
54	bravais	0	0.05	incoder/facebook/incoder-1B	python	python-insert	spectroscopy	code	en	insert	incoder-1B
55	canonicalize	1	0.05	incoder/facebook/incoder-1B	python	rdkit-insert	cheminf	code	ch	insert	incoder-1B
56	canonicalize	1	0.05	incoder/facebook/incoder-1B	python	rdkit-insert	cheminf	code	ch	insert	incoder-1B
57	canonicalize	1	0.05	incoder/facebook/incoder-1B	python	rdkit-insert	cheminf	code	ch	insert	incoder-1B
58	canonicalize	1	0.05	incoder/facebook/incoder-1B	python	rdkit-insert	cheminf	code	ch	insert	incoder-1B
59	canonicalize	1	0.05	incoder/facebook/incoder-1B	python	rdkit-insert	cheminf	code	ch	insert	incoder-1B
60	carnot_efficiency	0	0.05	incoder/facebook/incoder-1B	python	python-insert	thermo	code	en	insert	incoder-1B
61	carnot_efficiency	0	0.05	incoder/facebook/incoder-1B	python	python-insert	thermo	code	en	insert	incoder-1B
62	carnot_efficiency	0	0.05	incoder/facebook/incoder-1B	python	python-insert	thermo	code	en	insert	incoder-1B
63	carnot_efficiency	0	0.05	incoder/facebook/incoder-1B	python	python-insert	thermo	code	en	insert	incoder-1B
64	carnot_efficiency	0	0.05	incoder/facebook/incoder-1B	python	python-insert	thermo	code	en	insert	incoder-1B
65	claussius	0	0.05	incoder/facebook/incoder-1B	python	python-insert	thermo	code	en	insert	incoder-1B
66	claussius	0	0.05	incoder/facebook/incoder-1B	python	python-insert	thermo	code	en	insert	incoder-1B
67	claussius	0	0.05	incoder/facebook/incoder-1B	python	python-insert	thermo	code	en	insert	incoder-1B
68	claussius	0	0.05	incoder/facebook/incoder-1B	python	python-insert	thermo	code	en	insert	incoder-1B
69	claussius	0	0.05	incoder/facebook/incoder-1B	python	python-insert	thermo	code	en	insert	incoder-1B
70	compare_electronegativity	0	0.05	incoder/facebook/incoder-1B	python	python-insert	genchem	code	ch	insert	incoder-1B
71	compare_electronegativity	0	0.05	incoder/facebook/incoder-1B	python	python-insert	genchem	code	ch	insert	incoder-1B
72	compare_electronegativity	0	0.05	incoder/facebook/incoder-1B	python	python-insert	genchem	code	ch	insert	incoder-1B
73	compare_electronegativity	0	0.05	incoder/facebook/incoder-1B	python	python-insert	genchem	code	ch	insert	incoder-1B
74	compare_electronegativity	0	0.05	incoder/facebook/incoder-1B	python	python-insert	genchem	code	ch	insert	incoder-1B
75	descriptors	0	0.05	incoder/facebook/incoder-1B	python	rdkit-insert	cheminf	code	ch	insert	incoder-1B
76	descriptors	0	0.05	incoder/facebook/incoder-1B	python	rdkit-insert	cheminf	code	ch	insert	incoder-1B
77	descriptors	0	0.05	incoder/facebook/incoder-1B	python	rdkit-insert	cheminf	code	ch	insert	incoder-1B
78	descriptors	0	0.05	incoder/facebook/incoder-1B	python	rdkit-insert	cheminf	code	ch	insert	incoder-1B
79	descriptors	0	0.05	incoder/facebook/incoder-1B	python	rdkit-insert	cheminf	code	ch	insert	incoder-1B
80	de_broglie	0	0.05	incoder/facebook/incoder-1B	python	python-insert	qm	code	ch	insert	incoder-1B
81	de_broglie	0	0.05	incoder/facebook/incoder-1B	python	python-insert	genchem	code	ch	insert	incoder-1B
82	de_broglie	0	0.05	incoder/facebook/incoder-1B	python	python-insert	qm	code	ch	insert	incoder-1B
83	de_broglie	0	0.05	incoder/facebook/incoder-1B	python	python-insert	genchem	code	ch	insert	incoder-1B
84	de_broglie	0	0.05	incoder/facebook/incoder-1B	python	python-insert	qm	code	ch	insert	incoder-1B
85	de_broglie	0	0.05	incoder/facebook/incoder-1B	python	python-insert	genchem	code	ch	insert	incoder-1B
86	de_broglie	0	0.05	incoder/facebook/incoder-1B	python	python-insert	qm	code	ch	insert	incoder-1B
87	de_broglie	0	0.05	incoder/facebook/incoder-1B	python	python-insert	genchem	code	ch	insert	incoder-1B
88	de_broglie	0	0.05	incoder/facebook/incoder-1B	python	python-insert	qm	code	ch	insert	incoder-1B
89	de_broglie	0	0.05	incoder/facebook/incoder-1B	python	python-insert	genchem	code	ch	insert	incoder-1B
90	dipole	0	0.05	incoder/facebook/incoder-1B	python	numpy-insert	genchem	code	ch	insert	incoder-1B
91	dipole	0	0.05	incoder/facebook/incoder-1B	python	numpy-insert	genchem	code	ch	insert	incoder-1B
92	dipole	0	0.05	incoder/facebook/incoder-1B	python	numpy-insert	genchem	code	ch	insert	incoder-1B
93	dipole	0	0.05	incoder/facebook/incoder-1B	python	numpy-insert	genchem	code	ch	insert	incoder-1B
94	dipole	0	0.05	incoder/facebook/incoder-1B	python	numpy-insert	genchem	code	ch	insert	incoder-1B
95	dou	0	0.05	incoder/facebook/incoder-1B	python	rdkit-insert	spectroscopy	code	en	insert	incoder-1B
96	dou	0	0.05	incoder/facebook/incoder-1B	python	rdkit-insert	spectroscopy	code	en	insert	incoder-1B
97	dou	0	0.05	incoder/facebook/incoder-1B	python	rdkit-insert	spectroscopy	code	en	insert	incoder-1B
98	dou	0	0.05	incoder/facebook/incoder-1B	python	rdkit-insert	spectroscopy	code	en	insert	incoder-1B
99	dou	0	0.05	incoder/facebook/incoder-1B	python	rdkit-insert	spectroscopy	code	en	insert	incoder-1B
100	element_mass	0	0.05	incoder/facebook/incoder-1B	python	python-insert	genchem	code	ch	insert	incoder-1B
101	element_mass	0	0.05	incoder/facebook/incoder-1B	python	python-insert	genchem	code	ch	insert	incoder-1B
102	element_mass	0	0.05	incoder/facebook/incoder-1B	python	python-insert	genchem	code	ch	insert	incoder-1B
103	element_mass	0	0.05	incoder/facebook/incoder-1B	python	python-insert	genchem	code	ch	insert	incoder-1B
104	element_mass	0	0.05	incoder/facebook/incoder-1B	python	python-insert	genchem	code	ch	insert	incoder-1B
105	element_name	0	0.05	incoder/facebook/incoder-1B	python	python-insert	genchem	code	ch	insert	incoder-1B
106	element_name	0	0.05	incoder/facebook/incoder-1B	python	python-insert	genchem	code	ch	insert	incoder-1B
107	element_name	0	0.05	incoder/facebook/incoder-1B	python	python-insert	genchem	code	ch	insert	incoder-1B
108	element_name	0	0.05	incoder/facebook/incoder-1B	python	python-insert	genchem	code	ch	insert	incoder-1B
109	element_name	0	0.05	incoder/facebook/incoder-1B	python	python-insert	genchem	code	ch	insert	incoder-1B
110	energy_of_e	0	0.05	incoder/facebook/incoder-1B	python	python-insert	qm	code	en	insert	incoder-1B
111	energy_of_e	0	0.05	incoder/facebook/incoder-1B	python	python-insert	qm	code	en	insert	incoder-1B
112	energy_of_e	0	0.05	incoder/facebook/incoder-1B	python	python-insert	qm	code	en	insert	incoder-1B
113	energy_of_e	0	0.05	incoder/facebook/incoder-1B	python	python-insert	qm	code	en	insert	incoder-1B
114	energy_of_e	0	0.05	incoder/facebook/incoder-1B	python	python-insert	qm	code	en	insert	incoder-1B
115	find_indices	0	0.05	incoder/facebook/incoder-1B	python	mdtraj-insert	md	code	en	insert	incoder-1B
116	find_indices	0	0.05	incoder/facebook/incoder-1B	python	mdtraj-insert	md	code	en	insert	incoder-1B
117	find_indices	0	0.05	incoder/facebook/incoder-1B	python	mdtraj-insert	md	code	en	insert	incoder-1B
118	find_indices	0	0.05	incoder/facebook/incoder-1B	python	mdtraj-insert	md	code	en	insert	incoder-1B
119	find_indices	0	0.05	incoder/facebook/incoder-1B	python	mdtraj-insert	md	code	en	insert	incoder-1B
120	force_constant	0	0.05	incoder/facebook/incoder-1B	python	numpy-insert	spectroscopy	code	en	insert	incoder-1B
121	force_constant	0	0.05	incoder/facebook/incoder-1B	python	numpy-insert	spectroscopy	code	en	insert	incoder-1B
122	force_constant	0	0.05	incoder/facebook/incoder-1B	python	numpy-insert	spectroscopy	code	en	insert	incoder-1B
123	force_constant	0	0.05	incoder/facebook/incoder-1B	python	numpy-insert	spectroscopy	code	en	insert	incoder-1B
124	force_constant	0	0.05	incoder/facebook/incoder-1B	python	numpy-insert	spectroscopy	code	en	insert	incoder-1B
125	freezing_depression	0	0.05	incoder/facebook/incoder-1B	python	python-insert	genchem	code	ch	insert	incoder-1B
126	freezing_depression	0	0.05	incoder/facebook/incoder-1B	python	python-insert	genchem	code	ch	insert	incoder-1B
127	freezing_depression	0	0.05	incoder/facebook/incoder-1B	python	python-insert	genchem	code	ch	insert	incoder-1B
128	freezing_depression	0	0.05	incoder/facebook/incoder-1B	python	python-insert	genchem	code	ch	insert	incoder-1B
129	freezing_depression	0	0.05	incoder/facebook/incoder-1B	python	python-insert	genchem	code	ch	insert	incoder-1B
130	gaussian_input_emin	1	0.05	incoder/facebook/incoder-1B	python	python-insert	qm	human	en	insert	incoder-1B
131	gaussian_input_emin	1	0.05	incoder/facebook/incoder-1B	python	python-insert	qm	human	en	insert	incoder-1B
132	gaussian_input_emin	1	0.05	incoder/facebook/incoder-1B	python	python-insert	qm	human	en	insert	incoder-1B
133	gaussian_input_emin	1	0.05	incoder/facebook/incoder-1B	python	python-insert	qm	human	en	insert	incoder-1B
134	gaussian_input_emin	1	0.05	incoder/facebook/incoder-1B	python	python-insert	qm	human	en	insert	incoder-1B
135	genpos	0	0.05	incoder/facebook/incoder-1B	python	requests-insert	spectroscopy	code	en	insert	incoder-1B
136	genpos	0	0.05	incoder/facebook/incoder-1B	python	requests-insert	spectroscopy	code	en	insert	incoder-1B
137	genpos	0	0.05	incoder/facebook/incoder-1B	python	requests-insert	spectroscopy	code	en	insert	incoder-1B
138	genpos	0	0.05	incoder/facebook/incoder-1B	python	requests-insert	spectroscopy	code	en	insert	incoder-1B
139	genpos	0	0.05	incoder/facebook/incoder-1B	python	requests-insert	spectroscopy	code	en	insert	incoder-1B
140	heating_water	0	0.05	incoder/facebook/incoder-1B	python	python-insert	thermo	code	en	insert	incoder-1B
141	heating_water	0	0.05	incoder/facebook/incoder-1B	python	python-insert	thermo	code	en	insert	incoder-1B
142	heating_water	0	0.05	incoder/facebook/incoder-1B	python	python-insert	thermo	code	en	insert	incoder-1B
143	heating_water	0	0.05	incoder/facebook/incoder-1B	python	python-insert	thermo	code	en	insert	incoder-1B
144	heating_water	0	0.05	incoder/facebook/incoder-1B	python	python-insert	thermo	code	en	insert	incoder-1B
145	hydrophobic_res	0	0.05	incoder/facebook/incoder-1B	python	mdtraj-insert	bio	code	en	insert	incoder-1B
146	hydrophobic_res	0	0.05	incoder/facebook/incoder-1B	python	mdtraj-insert	bio	code	en	insert	incoder-1B
147	hydrophobic_res	0	0.05	incoder/facebook/incoder-1B	python	mdtraj-insert	bio	code	en	insert	incoder-1B
148	hydrophobic_res	0	0.05	incoder/facebook/incoder-1B	python	mdtraj-insert	bio	code	en	insert	incoder-1B
149	hydrophobic_res	0	0.05	incoder/facebook/incoder-1B	python	mdtraj-insert	bio	code	en	insert	incoder-1B
150	ideal_gas	0	0.05	incoder/facebook/incoder-1B	python	python-insert	genchem	code	ch	insert	incoder-1B
151	ideal_gas	0	0.05	incoder/facebook/incoder-1B	python	python-insert	thermo	code	ch	insert	incoder-1B
152	ideal_gas	0	0.05	incoder/facebook/incoder-1B	python	python-insert	genchem	code	ch	insert	incoder-1B
153	ideal_gas	0	0.05	incoder/facebook/incoder-1B	python	python-insert	thermo	code	ch	insert	incoder-1B
154	ideal_gas	0	0.05	incoder/facebook/incoder-1B	python	python-insert	genchem	code	ch	insert	incoder-1B
155	ideal_gas	0	0.05	incoder/facebook/incoder-1B	python	python-insert	thermo	code	ch	insert	incoder-1B
156	ideal_gas	0	0.05	incoder/facebook/incoder-1B	python	python-insert	genchem	code	ch	insert	incoder-1B
157	ideal_gas	0	0.05	incoder/facebook/incoder-1B	python	python-insert	thermo	code	ch	insert	incoder-1B
158	ideal_gas	0	0.05	incoder/facebook/incoder-1B	python	python-insert	genchem	code	ch	insert	incoder-1B
159	ideal_gas	0	0.05	incoder/facebook/incoder-1B	python	python-insert	thermo	code	ch	insert	incoder-1B
160	iupac2smiles	0	0.05	incoder/facebook/incoder-1B	python	rdkit-insert	cheminf	code	ch	insert	incoder-1B
161	iupac2smiles	0	0.05	incoder/facebook/incoder-1B	python	rdkit-insert	cheminf	code	ch	insert	incoder-1B
162	iupac2smiles	0	0.05	incoder/facebook/incoder-1B	python	rdkit-insert	cheminf	code	ch	insert	incoder-1B
163	iupac2smiles	0	0.05	incoder/facebook/incoder-1B	python	rdkit-insert	cheminf	code	ch	insert	incoder-1B
164	iupac2smiles	0	0.05	incoder/facebook/incoder-1B	python	rdkit-insert	cheminf	code	ch	insert	incoder-1B
165	karplusant	0	0.05	incoder/facebook/incoder-1B	python	numpy-insert	spectroscopy	code	en	insert	incoder-1B
166	karplusant	0	0.05	incoder/facebook/incoder-1B	python	numpy-insert	spectroscopy	code	en	insert	incoder-1B
167	karplusant	0	0.05	incoder/facebook/incoder-1B	python	numpy-insert	spectroscopy	code	en	insert	incoder-1B
168	karplusant	0	0.05	incoder/facebook/incoder-1B	python	numpy-insert	spectroscopy	code	en	insert	incoder-1B
169	karplusant	0	0.05	incoder/facebook/incoder-1B	python	numpy-insert	spectroscopy	code	en	insert	incoder-1B
170	kld	0	0.05	incoder/facebook/incoder-1B	python	numpy-insert	stats	code	en	insert	incoder-1B
171	kld	0	0.05	incoder/facebook/incoder-1B	python	numpy-insert	stats	code	en	insert	incoder-1B
172	kld	0	0.05	incoder/facebook/incoder-1B	python	numpy-insert	stats	code	en	insert	incoder-1B
173	kld	0	0.05	incoder/facebook/incoder-1B	python	numpy-insert	stats	code	en	insert	incoder-1B
174	kld	0	0.05	incoder/facebook/incoder-1B	python	numpy-insert	stats	code	en	insert	incoder-1B
175	langevin_dynamics	0	0.05	incoder/facebook/incoder-1B	python	numpy-insert	sim	code	en	insert	incoder-1B
176	langevin_dynamics	0	0.05	incoder/facebook/incoder-1B	python	numpy-insert	sim	code	en	insert	incoder-1B
177	langevin_dynamics	0	0.05	incoder/facebook/incoder-1B	python	numpy-insert	sim	code	en	insert	incoder-1B
178	langevin_dynamics	0	0.05	incoder/facebook/incoder-1B	python	numpy-insert	sim	code	en	insert	incoder-1B
179	langevin_dynamics	0	0.05	incoder/facebook/incoder-1B	python	numpy-insert	sim	code	en	insert	incoder-1B
180	weighted-least-squares	0	0.05	incoder/facebook/incoder-1B	python	numpy-insert	stats	code	en	insert	incoder-1B
181	weighted-least-squares	0	0.05	incoder/facebook/incoder-1B	python	numpy-insert	stats	code	en	insert	incoder-1B
182	weighted-least-squares	0	0.05	incoder/facebook/incoder-1B	python	numpy-insert	stats	code	en	insert	incoder-1B
183	weighted-least-squares	0	0.05	incoder/facebook/incoder-1B	python	numpy-insert	stats	code	en	insert	incoder-1B
184	weighted-least-squares	0	0.05	incoder/facebook/incoder-1B	python	numpy-insert	stats	code	en	insert	incoder-1B
185	lipinski_rule_of_five	0	0.05	incoder/facebook/incoder-1B	python	rdkit-insert	cheminf	code	ch	insert	incoder-1B
186	lipinski_rule_of_five	0	0.05	incoder/facebook/incoder-1B	python	rdkit-insert	cheminf	code	ch	insert	incoder-1B
187	lipinski_rule_of_five	0	0.05	incoder/facebook/incoder-1B	python	rdkit-insert	cheminf	code	ch	insert	incoder-1B
188	lipinski_rule_of_five	0	0.05	incoder/facebook/incoder-1B	python	rdkit-insert	cheminf	code	ch	insert	incoder-1B
189	lipinski_rule_of_five	0	0.05	incoder/facebook/incoder-1B	python	rdkit-insert	cheminf	code	ch	insert	incoder-1B
190	mape	0	0.05	incoder/facebook/incoder-1B	python	python-insert	stats	code	en	insert	incoder-1B
191	mape	0	0.05	incoder/facebook/incoder-1B	python	python-insert	stats	code	en	insert	incoder-1B
192	mape	0	0.05	incoder/facebook/incoder-1B	python	python-insert	stats	code	en	insert	incoder-1B
193	mape	0	0.05	incoder/facebook/incoder-1B	python	python-insert	stats	code	en	insert	incoder-1B
194	mape	0	0.05	incoder/facebook/incoder-1B	python	python-insert	stats	code	en	insert	incoder-1B
195	mapping_operator	0	0.05	incoder/facebook/incoder-1B	python	MDAnalysis-insert	md	code	en	insert	incoder-1B
196	mapping_operator	0	0.05	incoder/facebook/incoder-1B	python	MDAnalysis-insert	md	code	en	insert	incoder-1B
197	mapping_operator	0	0.05	incoder/facebook/incoder-1B	python	MDAnalysis-insert	md	code	en	insert	incoder-1B
198	mapping_operator	0	0.05	incoder/facebook/incoder-1B	python	MDAnalysis-insert	md	code	en	insert	incoder-1B
199	mapping_operator	0	0.05	incoder/facebook/incoder-1B	python	MDAnalysis-insert	md	code	en	insert	incoder-1B
200	max-boltz	0	0.05	incoder/facebook/incoder-1B	python	python-insert	genchem	code	ch	insert	incoder-1B
201	max-boltz	0	0.05	incoder/facebook/incoder-1B	python	python-insert	thermo	code	ch	insert	incoder-1B
202	max-boltz	0	0.05	incoder/facebook/incoder-1B	python	python-insert	genchem	code	ch	insert	incoder-1B
203	max-boltz	0	0.05	incoder/facebook/incoder-1B	python	python-insert	thermo	code	ch	insert	incoder-1B
204	max-boltz	0	0.05	incoder/facebook/incoder-1B	python	python-insert	genchem	code	ch	insert	incoder-1B
205	max-boltz	0	0.05	incoder/facebook/incoder-1B	python	python-insert	thermo	code	ch	insert	incoder-1B
206	max-boltz	0	0.05	incoder/facebook/incoder-1B	python	python-insert	genchem	code	ch	insert	incoder-1B
207	max-boltz	0	0.05	incoder/facebook/incoder-1B	python	python-insert	thermo	code	ch	insert	incoder-1B
208	max-boltz	0	0.05	incoder/facebook/incoder-1B	python	python-insert	genchem	code	ch	insert	incoder-1B
209	max-boltz	0	0.05	incoder/facebook/incoder-1B	python	python-insert	thermo	code	ch	insert	incoder-1B
210	mc_harmonic	1	0.05	incoder/facebook/incoder-1B	python	numpy-insert	sim	human	en	insert	incoder-1B
211	mc_harmonic	1	0.05	incoder/facebook/incoder-1B	python	numpy-insert	sim	human	en	insert	incoder-1B
212	mc_harmonic	1	0.05	incoder/facebook/incoder-1B	python	numpy-insert	sim	human	en	insert	incoder-1B
213	mc_harmonic	1	0.05	incoder/facebook/incoder-1B	python	numpy-insert	sim	human	en	insert	incoder-1B
214	mc_harmonic	1	0.05	incoder/facebook/incoder-1B	python	numpy-insert	sim	human	en	insert	incoder-1B
215	mc_ising	0	0.05	incoder/facebook/incoder-1B	python	numpy-insert	sim	human	en	insert	incoder-1B
216	mc_ising	0	0.05	incoder/facebook/incoder-1B	python	numpy-insert	sim	human	en	insert	incoder-1B
217	mc_ising	0	0.05	incoder/facebook/incoder-1B	python	numpy-insert	sim	human	en	insert	incoder-1B
218	mc_ising	0	0.05	incoder/facebook/incoder-1B	python	numpy-insert	sim	human	en	insert	incoder-1B
219	mc_ising	0	0.05	incoder/facebook/incoder-1B	python	numpy-insert	sim	human	en	insert	incoder-1B
220	michaelis	0	0.05	incoder/facebook/incoder-1B	python	python-insert	bio	code	en	insert	incoder-1B
221	michaelis	0	0.05	incoder/facebook/incoder-1B	python	python-insert	thermo	code	en	insert	incoder-1B
222	michaelis	0	0.05	incoder/facebook/incoder-1B	python	python-insert	bio	code	en	insert	incoder-1B
223	michaelis	0	0.05	incoder/facebook/incoder-1B	python	python-insert	thermo	code	en	insert	incoder-1B
224	michaelis	0	0.05	incoder/facebook/incoder-1B	python	python-insert	bio	code	en	insert	incoder-1B
225	michaelis	0	0.05	incoder/facebook/incoder-1B	python	python-insert	thermo	code	en	insert	incoder-1B
226	michaelis	0	0.05	incoder/facebook/incoder-1B	python	python-insert	bio	code	en	insert	incoder-1B
227	michaelis	0	0.05	incoder/facebook/incoder-1B	python	python-insert	thermo	code	en	insert	incoder-1B
228	michaelis	0	0.05	incoder/facebook/incoder-1B	python	python-insert	bio	code	en	insert	incoder-1B
229	michaelis	0	0.05	incoder/facebook/incoder-1B	python	python-insert	thermo	code	en	insert	incoder-1B
230	mol_charge	1	0.05	incoder/facebook/incoder-1B	python	rdkit-insert	cheminf	code	ch	insert	incoder-1B
231	mol_charge	1	0.05	incoder/facebook/incoder-1B	python	rdkit-insert	cheminf	code	ch	insert	incoder-1B
232	mol_charge	1	0.05	incoder/facebook/incoder-1B	python	rdkit-insert	cheminf	code	ch	insert	incoder-1B
233	mol_charge	1	0.05	incoder/facebook/incoder-1B	python	rdkit-insert	cheminf	code	ch	insert	incoder-1B
234	mol_charge	1	0.05	incoder/facebook/incoder-1B	python	rdkit-insert	cheminf	code	ch	insert	incoder-1B
235	net_charge	0	0.05	incoder/facebook/incoder-1B	python	python-insert	bio	code	en	insert	incoder-1B
236	net_charge	0	0.05	incoder/facebook/incoder-1B	python	python-insert	bio	code	en	insert	incoder-1B
237	net_charge	0	0.05	incoder/facebook/incoder-1B	python	python-insert	bio	code	en	insert	incoder-1B
238	net_charge	0	0.05	incoder/facebook/incoder-1B	python	python-insert	bio	code	en	insert	incoder-1B
239	net_charge	0	0.05	incoder/facebook/incoder-1B	python	python-insert	bio	code	en	insert	incoder-1B
240	nwchem_input_emin	1	0.05	incoder/facebook/incoder-1B	python	python-insert	qm	human	en	insert	incoder-1B
241	nwchem_input_emin	1	0.05	incoder/facebook/incoder-1B	python	python-insert	qm	human	en	insert	incoder-1B
242	nwchem_input_emin	1	0.05	incoder/facebook/incoder-1B	python	python-insert	qm	human	en	insert	incoder-1B
243	nwchem_input_emin	1	0.05	incoder/facebook/incoder-1B	python	python-insert	qm	human	en	insert	incoder-1B
244	nwchem_input_emin	1	0.05	incoder/facebook/incoder-1B	python	python-insert	qm	human	en	insert	incoder-1B
245	ohe	0	0.05	incoder/facebook/incoder-1B	python	numpy-insert	stats	code	en	insert	incoder-1B
246	ohe	0	0.05	incoder/facebook/incoder-1B	python	numpy-insert	stats	code	en	insert	incoder-1B
247	ohe	0	0.05	incoder/facebook/incoder-1B	python	numpy-insert	stats	code	en	insert	incoder-1B
248	ohe	0	0.05	incoder/facebook/incoder-1B	python	numpy-insert	stats	code	en	insert	incoder-1B
249	ohe	0	0.05	incoder/facebook/incoder-1B	python	numpy-insert	stats	code	en	insert	incoder-1B
250	osmotic_pressure	0	0.05	incoder/facebook/incoder-1B	python	python-insert	genchem	code	ch	insert	incoder-1B
251	osmotic_pressure	0	0.05	incoder/facebook/incoder-1B	python	python-insert	genchem	code	ch	insert	incoder-1B
252	osmotic_pressure	0	0.05	incoder/facebook/incoder-1B	python	python-insert	genchem	code	ch	insert	incoder-1B
253	osmotic_pressure	0	0.05	incoder/facebook/incoder-1B	python	python-insert	genchem	code	ch	insert	incoder-1B
254	osmotic_pressure	0	0.05	incoder/facebook/incoder-1B	python	python-insert	genchem	code	ch	insert	incoder-1B
255	pair_wise	0	0.05	incoder/facebook/incoder-1B	python	mdtraj-insert	md	code	en	insert	incoder-1B
256	pair_wise	0	0.05	incoder/facebook/incoder-1B	python	mdtraj-insert	bio	code	en	insert	incoder-1B
257	pair_wise	0	0.05	incoder/facebook/incoder-1B	python	mdtraj-insert	md	code	en	insert	incoder-1B
258	pair_wise	0	0.05	incoder/facebook/incoder-1B	python	mdtraj-insert	bio	code	en	insert	incoder-1B
259	pair_wise	0	0.05	incoder/facebook/incoder-1B	python	mdtraj-insert	md	code	en	insert	incoder-1B
260	pair_wise	0	0.05	incoder/facebook/incoder-1B	python	mdtraj-insert	bio	code	en	insert	incoder-1B
261	pair_wise	0	0.05	incoder/facebook/incoder-1B	python	mdtraj-insert	md	code	en	insert	incoder-1B
262	pair_wise	0	0.05	incoder/facebook/incoder-1B	python	mdtraj-insert	bio	code	en	insert	incoder-1B
263	pair_wise	0	0.05	incoder/facebook/incoder-1B	python	mdtraj-insert	md	code	en	insert	incoder-1B
264	pair_wise	0	0.05	incoder/facebook/incoder-1B	python	mdtraj-insert	bio	code	en	insert	incoder-1B
265	pauli_matrices	0	0.05	incoder/facebook/incoder-1B	python	numpy-insert	qm	code	en	insert	incoder-1B
266	pauli_matrices	0	0.05	incoder/facebook/incoder-1B	python	numpy-insert	qm	code	en	insert	incoder-1B
267	pauli_matrices	0	0.05	incoder/facebook/incoder-1B	python	numpy-insert	qm	code	en	insert	incoder-1B
268	pauli_matrices	0	0.05	incoder/facebook/incoder-1B	python	numpy-insert	qm	code	en	insert	incoder-1B
269	pauli_matrices	0	0.05	incoder/facebook/incoder-1B	python	numpy-insert	qm	code	en	insert	incoder-1B
270	pib_1d	0	0.05	incoder/facebook/incoder-1B	python	python-insert	qm	code	en	insert	incoder-1B
271	pib_1d	0	0.05	incoder/facebook/incoder-1B	python	python-insert	qm	code	en	insert	incoder-1B
272	pib_1d	0	0.05	incoder/facebook/incoder-1B	python	python-insert	qm	code	en	insert	incoder-1B
273	pib_1d	0	0.05	incoder/facebook/incoder-1B	python	python-insert	qm	code	en	insert	incoder-1B
274	pib_1d	0	0.05	incoder/facebook/incoder-1B	python	python-insert	qm	code	en	insert	incoder-1B
275	pi	0	0.05	incoder/facebook/incoder-1B	python	numpy-insert	stats	code	en	insert	incoder-1B
276	pi	0	0.05	incoder/facebook/incoder-1B	python	numpy-insert	stats	code	en	insert	incoder-1B
277	pi	0	0.05	incoder/facebook/incoder-1B	python	numpy-insert	stats	code	en	insert	incoder-1B
278	pi	0	0.05	incoder/facebook/incoder-1B	python	numpy-insert	stats	code	en	insert	incoder-1B
279	pi	0	0.05	incoder/facebook/incoder-1B	python	numpy-insert	stats	code	en	insert	incoder-1B
280	plot_3d_sin	1	0.05	incoder/facebook/incoder-1B	python	matplotlib-insert	plot	human	en	insert	incoder-1B
281	plot_3d_sin	1	0.05	incoder/facebook/incoder-1B	python	matplotlib-insert	plot	human	en	insert	incoder-1B
282	plot_3d_sin	1	0.05	incoder/facebook/incoder-1B	python	matplotlib-insert	plot	human	en	insert	incoder-1B
283	plot_3d_sin	1	0.05	incoder/facebook/incoder-1B	python	matplotlib-insert	plot	human	en	insert	incoder-1B
284	plot_3d_sin	1	0.05	incoder/facebook/incoder-1B	python	matplotlib-insert	plot	human	en	insert	incoder-1B
285	plot_bar	1	0.05	incoder/facebook/incoder-1B	python	matplotlib-insert	plot	human	en	insert	incoder-1B
286	plot_bar	1	0.05	incoder/facebook/incoder-1B	python	matplotlib-insert	plot	human	en	insert	incoder-1B
287	plot_bar	1	0.05	incoder/facebook/incoder-1B	python	matplotlib-insert	plot	human	en	insert	incoder-1B
288	plot_bar	1	0.05	incoder/facebook/incoder-1B	python	matplotlib-insert	plot	human	en	insert	incoder-1B
289	plot_bar	1	0.05	incoder/facebook/incoder-1B	python	matplotlib-insert	plot	human	en	insert	incoder-1B
290	plot_contour	1	0.05	incoder/facebook/incoder-1B	python	matplotlib-insert	plot	human	en	insert	incoder-1B
291	plot_contour	1	0.05	incoder/facebook/incoder-1B	python	matplotlib-insert	plot	human	en	insert	incoder-1B
292	plot_contour	1	0.05	incoder/facebook/incoder-1B	python	matplotlib-insert	plot	human	en	insert	incoder-1B
293	plot_contour	1	0.05	incoder/facebook/incoder-1B	python	matplotlib-insert	plot	human	en	insert	incoder-1B
294	plot_contour	1	0.05	incoder/facebook/incoder-1B	python	matplotlib-insert	plot	human	en	insert	incoder-1B
295	plot_correlation	1	0.05	incoder/facebook/incoder-1B	python	matplotlib-insert	plot	human	en	insert	incoder-1B
296	plot_correlation	1	0.05	incoder/facebook/incoder-1B	python	matplotlib-insert	plot	human	en	insert	incoder-1B
297	plot_correlation	1	0.05	incoder/facebook/incoder-1B	python	matplotlib-insert	plot	human	en	insert	incoder-1B
298	plot_correlation	0	0.05	incoder/facebook/incoder-1B	python	matplotlib-insert	plot	human	en	insert	incoder-1B
299	plot_correlation	1	0.05	incoder/facebook/incoder-1B	python	matplotlib-insert	plot	human	en	insert	incoder-1B
300	plot_dual_axis	1	0.05	incoder/facebook/incoder-1B	python	matplotlib-insert	plot	human	en	insert	incoder-1B
301	plot_dual_axis	1	0.05	incoder/facebook/incoder-1B	python	matplotlib-insert	plot	human	en	insert	incoder-1B
302	plot_dual_axis	1	0.05	incoder/facebook/incoder-1B	python	matplotlib-insert	plot	human	en	insert	incoder-1B
303	plot_dual_axis	0	0.05	incoder/facebook/incoder-1B	python	matplotlib-insert	plot	human	en	insert	incoder-1B
304	plot_dual_axis	1	0.05	incoder/facebook/incoder-1B	python	matplotlib-insert	plot	human	en	insert	incoder-1B
305	plot_emoji	1	0.05	incoder/facebook/incoder-1B	python	matplotlib-insert	plot	human	en	insert	incoder-1B
306	plot_emoji	0	0.05	incoder/facebook/incoder-1B	python	matplotlib-insert	plot	human	en	insert	incoder-1B
307	plot_emoji	0	0.05	incoder/facebook/incoder-1B	python	matplotlib-insert	plot	human	en	insert	incoder-1B
308	plot_emoji	0	0.05	incoder/facebook/incoder-1B	python	matplotlib-insert	plot	human	en	insert	incoder-1B
309	plot_emoji	0	0.05	incoder/facebook/incoder-1B	python	matplotlib-insert	plot	human	en	insert	incoder-1B
310	plot_outside_legend	1	0.05	incoder/facebook/incoder-1B	python	matplotlib-insert	plot	human	en	insert	incoder-1B
311	plot_outside_legend	1	0.05	incoder/facebook/incoder-1B	python	matplotlib-insert	plot	human	en	insert	incoder-1B
312	plot_outside_legend	1	0.05	incoder/facebook/incoder-1B	python	matplotlib-insert	plot	human	en	insert	incoder-1B
313	plot_outside_legend	1	0.05	incoder/facebook/incoder-1B	python	matplotlib-insert	plot	human	en	insert	incoder-1B
314	plot_outside_legend	1	0.05	incoder/facebook/incoder-1B	python	matplotlib-insert	plot	human	en	insert	incoder-1B
315	plot_pointsize	0	0.05	incoder/facebook/incoder-1B	python	matplotlib-insert	plot	human	en	insert	incoder-1B
316	plot_pointsize	0	0.05	incoder/facebook/incoder-1B	python	matplotlib-insert	plot	human	en	insert	incoder-1B
317	plot_pointsize	0	0.05	incoder/facebook/incoder-1B	python	matplotlib-insert	plot	human	en	insert	incoder-1B
318	plot_pointsize	0	0.05	incoder/facebook/incoder-1B	python	matplotlib-insert	plot	human	en	insert	incoder-1B
319	plot_pointsize	1	0.05	incoder/facebook/incoder-1B	python	matplotlib-insert	plot	human	en	insert	incoder-1B
320	plot_sin	1	0.05	incoder/facebook/incoder-1B	python	matplotlib-insert	plot	human	en	insert	incoder-1B
321	plot_sin	1	0.05	incoder/facebook/incoder-1B	python	matplotlib-insert	plot	human	en	insert	incoder-1B
322	plot_sin	1	0.05	incoder/facebook/incoder-1B	python	matplotlib-insert	plot	human	en	insert	incoder-1B
323	plot_sin	1	0.05	incoder/facebook/incoder-1B	python	matplotlib-insert	plot	human	en	insert	incoder-1B
324	plot_sin	1	0.05	incoder/facebook/incoder-1B	python	matplotlib-insert	plot	human	en	insert	incoder-1B
325	plot_sin_polar	1	0.05	incoder/facebook/incoder-1B	python	matplotlib-insert	plot	human	en	insert	incoder-1B
326	plot_sin_polar	1	0.05	incoder/facebook/incoder-1B	python	matplotlib-insert	plot	human	en	insert	incoder-1B
327	plot_sin_polar	1	0.05	incoder/facebook/incoder-1B	python	matplotlib-insert	plot	human	en	insert	incoder-1B
328	plot_sin_polar	1	0.05	incoder/facebook/incoder-1B	python	matplotlib-insert	plot	human	en	insert	incoder-1B
329	plot_sin_polar	1	0.05	incoder/facebook/incoder-1B	python	matplotlib-insert	plot	human	en	insert	incoder-1B
330	pred_interval	0	0.05	incoder/facebook/incoder-1B	python	numpy-insert	stats	code	en	insert	incoder-1B
331	pred_interval	0	0.05	incoder/facebook/incoder-1B	python	numpy-insert	stats	code	en	insert	incoder-1B
332	pred_interval	0	0.05	incoder/facebook/incoder-1B	python	numpy-insert	stats	code	en	insert	incoder-1B
333	pred_interval	0	0.05	incoder/facebook/incoder-1B	python	numpy-insert	stats	code	en	insert	incoder-1B
334	pred_interval	0	0.05	incoder/facebook/incoder-1B	python	numpy-insert	stats	code	en	insert	incoder-1B
335	protein-render	0	0.05	incoder/facebook/incoder-1B	python	mdtraj-insert	bio	human	en	insert	incoder-1B
336	protein-render	0	0.05	incoder/facebook/incoder-1B	python	mdtraj-insert	bio	human	en	insert	incoder-1B
337	protein-render	0	0.05	incoder/facebook/incoder-1B	python	mdtraj-insert	bio	human	en	insert	incoder-1B
338	protein-render	0	0.05	incoder/facebook/incoder-1B	python	mdtraj-insert	bio	human	en	insert	incoder-1B
339	protein-render	0	0.05	incoder/facebook/incoder-1B	python	mdtraj-insert	bio	human	en	insert	incoder-1B
340	pubchem	0	0.05	incoder/facebook/incoder-1B	python	rdkit-insert	cheminf	code	ch	insert	incoder-1B
341	pubchem	0	0.05	incoder/facebook/incoder-1B	python	rdkit-insert	cheminf	code	ch	insert	incoder-1B
342	pubchem	0	0.05	incoder/facebook/incoder-1B	python	rdkit-insert	cheminf	code	ch	insert	incoder-1B
343	pubchem	0	0.05	incoder/facebook/incoder-1B	python	rdkit-insert	cheminf	code	ch	insert	incoder-1B
344	pubchem	0	0.05	incoder/facebook/incoder-1B	python	rdkit-insert	cheminf	code	ch	insert	incoder-1B
345	pyscf_energy	0	0.05	incoder/facebook/incoder-1B	python	pyscf-insert	qm	code	en	insert	incoder-1B
346	pyscf_energy	0	0.05	incoder/facebook/incoder-1B	python	pyscf-insert	qm	code	en	insert	incoder-1B
347	pyscf_energy	0	0.05	incoder/facebook/incoder-1B	python	pyscf-insert	qm	code	en	insert	incoder-1B
348	pyscf_energy	0	0.05	incoder/facebook/incoder-1B	python	pyscf-insert	qm	code	en	insert	incoder-1B
349	pyscf_energy	0	0.05	incoder/facebook/incoder-1B	python	pyscf-insert	qm	code	en	insert	incoder-1B
350	qed	0	0.05	incoder/facebook/incoder-1B	python	rdkit-insert	cheminf	code	ch	insert	incoder-1B
351	qed	0	0.05	incoder/facebook/incoder-1B	python	rdkit-insert	cheminf	code	ch	insert	incoder-1B
352	qed	0	0.05	incoder/facebook/incoder-1B	python	rdkit-insert	cheminf	code	ch	insert	incoder-1B
353	qed	0	0.05	incoder/facebook/incoder-1B	python	rdkit-insert	cheminf	code	ch	insert	incoder-1B
354	qed	0	0.05	incoder/facebook/incoder-1B	python	rdkit-insert	cheminf	code	ch	insert	incoder-1B
355	quantile	0	0.05	incoder/facebook/incoder-1B	python	numpy-insert	stats	code	en	insert	incoder-1B
356	quantile	0	0.05	incoder/facebook/incoder-1B	python	numpy-insert	stats	code	en	insert	incoder-1B
357	quantile	0	0.05	incoder/facebook/incoder-1B	python	numpy-insert	stats	code	en	insert	incoder-1B
358	quantile	0	0.05	incoder/facebook/incoder-1B	python	numpy-insert	stats	code	en	insert	incoder-1B
359	quantile	0	0.05	incoder/facebook/incoder-1B	python	numpy-insert	stats	code	en	insert	incoder-1B
360	random_walk	0	0.05	incoder/facebook/incoder-1B	python	numpy-insert	sim	code	en	insert	incoder-1B
361	random_walk	0	0.05	incoder/facebook/incoder-1B	python	numpy-insert	stats	code	en	insert	incoder-1B
362	random_walk	0	0.05	incoder/facebook/incoder-1B	python	numpy-insert	sim	code	en	insert	incoder-1B
363	random_walk	0	0.05	incoder/facebook/incoder-1B	python	numpy-insert	stats	code	en	insert	incoder-1B
364	random_walk	0	0.05	incoder/facebook/incoder-1B	python	numpy-insert	sim	code	en	insert	incoder-1B
365	random_walk	0	0.05	incoder/facebook/incoder-1B	python	numpy-insert	stats	code	en	insert	incoder-1B
366	random_walk	0	0.05	incoder/facebook/incoder-1B	python	numpy-insert	sim	code	en	insert	incoder-1B
367	random_walk	0	0.05	incoder/facebook/incoder-1B	python	numpy-insert	stats	code	en	insert	incoder-1B
368	random_walk	0	0.05	incoder/facebook/incoder-1B	python	numpy-insert	sim	code	en	insert	incoder-1B
369	random_walk	0	0.05	incoder/facebook/incoder-1B	python	numpy-insert	stats	code	en	insert	incoder-1B
370	remove-water	0	0.05	incoder/facebook/incoder-1B	python	mdtraj-insert	md	code	en	insert	incoder-1B
371	remove-water	0	0.05	incoder/facebook/incoder-1B	python	mdtraj-insert	md	code	en	insert	incoder-1B
372	remove-water	0	0.05	incoder/facebook/incoder-1B	python	mdtraj-insert	md	code	en	insert	incoder-1B
373	remove-water	0	0.05	incoder/facebook/incoder-1B	python	mdtraj-insert	md	code	en	insert	incoder-1B
374	remove-water	0	0.05	incoder/facebook/incoder-1B	python	mdtraj-insert	md	code	en	insert	incoder-1B
375	rmse	0	0.05	incoder/facebook/incoder-1B	python	numpy-insert	stats	code	en	insert	incoder-1B
376	rmse	0	0.05	incoder/facebook/incoder-1B	python	numpy-insert	stats	code	en	insert	incoder-1B
377	rmse	0	0.05	incoder/facebook/incoder-1B	python	numpy-insert	stats	code	en	insert	incoder-1B
378	rmse	0	0.05	incoder/facebook/incoder-1B	python	numpy-insert	stats	code	en	insert	incoder-1B
379	rmse	0	0.05	incoder/facebook/incoder-1B	python	numpy-insert	stats	code	en	insert	incoder-1B
380	rms_velocity	0	0.05	incoder/facebook/incoder-1B	python	python-insert	thermo	code	en	insert	incoder-1B
381	rms_velocity	0	0.05	incoder/facebook/incoder-1B	python	python-insert	thermo	code	en	insert	incoder-1B
382	rms_velocity	0	0.05	incoder/facebook/incoder-1B	python	python-insert	thermo	code	en	insert	incoder-1B
383	rms_velocity	0	0.05	incoder/facebook/incoder-1B	python	python-insert	thermo	code	en	insert	incoder-1B
384	rms_velocity	0	0.05	incoder/facebook/incoder-1B	python	python-insert	thermo	code	en	insert	incoder-1B
385	rog	0	0.05	incoder/facebook/incoder-1B	python	mdtraj-insert	md	code	en	insert	incoder-1B
386	rog	0	0.05	incoder/facebook/incoder-1B	python	mdtraj-insert	bio	code	en	insert	incoder-1B
387	rog	0	0.05	incoder/facebook/incoder-1B	python	mdtraj-insert	md	code	en	insert	incoder-1B
388	rog	0	0.05	incoder/facebook/incoder-1B	python	mdtraj-insert	bio	code	en	insert	incoder-1B
389	rog	0	0.05	incoder/facebook/incoder-1B	python	mdtraj-insert	md	code	en	insert	incoder-1B
390	rog	0	0.05	incoder/facebook/incoder-1B	python	mdtraj-insert	bio	code	en	insert	incoder-1B
391	rog	0	0.05	incoder/facebook/incoder-1B	python	mdtraj-insert	md	code	en	insert	incoder-1B
392	rog	0	0.05	incoder/facebook/incoder-1B	python	mdtraj-insert	bio	code	en	insert	incoder-1B
393	rog	0	0.05	incoder/facebook/incoder-1B	python	mdtraj-insert	md	code	en	insert	incoder-1B
394	rog	0	0.05	incoder/facebook/incoder-1B	python	mdtraj-insert	bio	code	en	insert	incoder-1B
395	rotationant	0	0.05	incoder/facebook/incoder-1B	python	numpy-insert	spectroscopy	code	en	insert	incoder-1B
396	rotationant	0	0.05	incoder/facebook/incoder-1B	python	numpy-insert	spectroscopy	code	en	insert	incoder-1B
397	rotationant	0	0.05	incoder/facebook/incoder-1B	python	numpy-insert	spectroscopy	code	en	insert	incoder-1B
398	rotationant	0	0.05	incoder/facebook/incoder-1B	python	numpy-insert	spectroscopy	code	en	insert	incoder-1B
399	rotationant	0	0.05	incoder/facebook/incoder-1B	python	numpy-insert	spectroscopy	code	en	insert	incoder-1B
400	rotation_higherant	0	0.05	incoder/facebook/incoder-1B	python	numpy-insert	spectroscopy	code	en	insert	incoder-1B
401	rotation_higherant	0	0.05	incoder/facebook/incoder-1B	python	numpy-insert	spectroscopy	code	en	insert	incoder-1B
402	rotation_higherant	0	0.05	incoder/facebook/incoder-1B	python	numpy-insert	spectroscopy	code	en	insert	incoder-1B
403	rotation_higherant	0	0.05	incoder/facebook/incoder-1B	python	numpy-insert	spectroscopy	code	en	insert	incoder-1B
404	rotation_higherant	0	0.05	incoder/facebook/incoder-1B	python	numpy-insert	spectroscopy	code	en	insert	incoder-1B
405	sasa	0	0.05	incoder/facebook/incoder-1B	python	mdtraj-insert	md	code	en	insert	incoder-1B
406	sasa	0	0.05	incoder/facebook/incoder-1B	python	mdtraj-insert	bio	code	en	insert	incoder-1B
407	sasa	0	0.05	incoder/facebook/incoder-1B	python	mdtraj-insert	md	code	en	insert	incoder-1B
408	sasa	0	0.05	incoder/facebook/incoder-1B	python	mdtraj-insert	bio	code	en	insert	incoder-1B
409	sasa	0	0.05	incoder/facebook/incoder-1B	python	mdtraj-insert	md	code	en	insert	incoder-1B
410	sasa	0	0.05	incoder/facebook/incoder-1B	python	mdtraj-insert	bio	code	en	insert	incoder-1B
411	sasa	0	0.05	incoder/facebook/incoder-1B	python	mdtraj-insert	md	code	en	insert	incoder-1B
412	sasa	0	0.05	incoder/facebook/incoder-1B	python	mdtraj-insert	bio	code	en	insert	incoder-1B
413	sasa	0	0.05	incoder/facebook/incoder-1B	python	mdtraj-insert	md	code	en	insert	incoder-1B
414	sasa	0	0.05	incoder/facebook/incoder-1B	python	mdtraj-insert	bio	code	en	insert	incoder-1B
415	scaffold	0	0.05	incoder/facebook/incoder-1B	python	rdkit-insert	cheminf	code	ch	insert	incoder-1B
416	scaffold	0	0.05	incoder/facebook/incoder-1B	python	rdkit-insert	cheminf	code	ch	insert	incoder-1B
417	scaffold	0	0.05	incoder/facebook/incoder-1B	python	rdkit-insert	cheminf	code	ch	insert	incoder-1B
418	scaffold	0	0.05	incoder/facebook/incoder-1B	python	rdkit-insert	cheminf	code	ch	insert	incoder-1B
419	scaffold	0	0.05	incoder/facebook/incoder-1B	python	rdkit-insert	cheminf	code	ch	insert	incoder-1B
420	seq-align	0	0.05	incoder/facebook/incoder-1B	python	biopython-insert	bio	code	en	insert	incoder-1B
421	seq-align	0	0.05	incoder/facebook/incoder-1B	python	biopython-insert	bio	code	en	insert	incoder-1B
422	seq-align	0	0.05	incoder/facebook/incoder-1B	python	biopython-insert	bio	code	en	insert	incoder-1B
423	seq-align	0	0.05	incoder/facebook/incoder-1B	python	biopython-insert	bio	code	en	insert	incoder-1B
424	seq-align	0	0.05	incoder/facebook/incoder-1B	python	biopython-insert	bio	code	en	insert	incoder-1B
425	seq-trans	0	0.05	incoder/facebook/incoder-1B	python	biopython-insert	bio	code	en	insert	incoder-1B
426	seq-trans	0	0.05	incoder/facebook/incoder-1B	python	biopython-insert	bio	code	en	insert	incoder-1B
427	seq-trans	0	0.05	incoder/facebook/incoder-1B	python	biopython-insert	bio	code	en	insert	incoder-1B
428	seq-trans	0	0.05	incoder/facebook/incoder-1B	python	biopython-insert	bio	code	en	insert	incoder-1B
429	seq-trans	0	0.05	incoder/facebook/incoder-1B	python	biopython-insert	bio	code	en	insert	incoder-1B
430	spectral_r	0	0.05	incoder/facebook/incoder-1B	python	numpy-insert	stats	code	en	insert	incoder-1B
431	spectral_r	0	0.05	incoder/facebook/incoder-1B	python	numpy-insert	stats	code	en	insert	incoder-1B
432	spectral_r	0	0.05	incoder/facebook/incoder-1B	python	numpy-insert	stats	code	en	insert	incoder-1B
433	spectral_r	0	0.05	incoder/facebook/incoder-1B	python	numpy-insert	stats	code	en	insert	incoder-1B
434	spectral_r	0	0.05	incoder/facebook/incoder-1B	python	numpy-insert	stats	code	en	insert	incoder-1B
435	find_peaks	0	0.05	incoder/facebook/incoder-1B	python	scipy-insert	spectroscopy	code	en	insert	incoder-1B
436	find_peaks	0	0.05	incoder/facebook/incoder-1B	python	scipy-insert	spectroscopy	code	en	insert	incoder-1B
437	find_peaks	0	0.05	incoder/facebook/incoder-1B	python	scipy-insert	spectroscopy	code	en	insert	incoder-1B
438	find_peaks	0	0.05	incoder/facebook/incoder-1B	python	scipy-insert	spectroscopy	code	en	insert	incoder-1B
439	find_peaks	0	0.05	incoder/facebook/incoder-1B	python	scipy-insert	spectroscopy	code	en	insert	incoder-1B
440	speed_of_sound	0	0.05	incoder/facebook/incoder-1B	python	python-insert	thermo	code	en	insert	incoder-1B
441	speed_of_sound	0	0.05	incoder/facebook/incoder-1B	python	python-insert	thermo	code	en	insert	incoder-1B
442	speed_of_sound	0	0.05	incoder/facebook/incoder-1B	python	python-insert	thermo	code	en	insert	incoder-1B
443	speed_of_sound	0	0.05	incoder/facebook/incoder-1B	python	python-insert	thermo	code	en	insert	incoder-1B
444	speed_of_sound	0	0.05	incoder/facebook/incoder-1B	python	python-insert	thermo	code	en	insert	incoder-1B
445	substructure	0	0.05	incoder/facebook/incoder-1B	python	rdkit-insert	cheminf	code	ch	insert	incoder-1B
446	substructure	0	0.05	incoder/facebook/incoder-1B	python	rdkit-insert	cheminf	code	ch	insert	incoder-1B
447	substructure	0	0.05	incoder/facebook/incoder-1B	python	rdkit-insert	cheminf	code	ch	insert	incoder-1B
448	substructure	0	0.05	incoder/facebook/incoder-1B	python	rdkit-insert	cheminf	code	ch	insert	incoder-1B
449	substructure	0	0.05	incoder/facebook/incoder-1B	python	rdkit-insert	cheminf	code	ch	insert	incoder-1B
450	tanimoto	0	0.05	incoder/facebook/incoder-1B	python	rdkit-insert	cheminf	code	ch	insert	incoder-1B
451	tanimoto	0	0.05	incoder/facebook/incoder-1B	python	rdkit-insert	cheminf	code	ch	insert	incoder-1B
452	tanimoto	0	0.05	incoder/facebook/incoder-1B	python	rdkit-insert	cheminf	code	ch	insert	incoder-1B
453	tanimoto	0	0.05	incoder/facebook/incoder-1B	python	rdkit-insert	cheminf	code	ch	insert	incoder-1B
454	tanimoto	0	0.05	incoder/facebook/incoder-1B	python	rdkit-insert	cheminf	code	ch	insert	incoder-1B
455	unbdistance	0	0.05	incoder/facebook/incoder-1B	python	mdtraj-insert	md	code	en	insert	incoder-1B
456	unbdistance	0	0.05	incoder/facebook/incoder-1B	python	mdtraj-insert	md	code	en	insert	incoder-1B
457	unbdistance	0	0.05	incoder/facebook/incoder-1B	python	mdtraj-insert	md	code	en	insert	incoder-1B
458	unbdistance	0	0.05	incoder/facebook/incoder-1B	python	mdtraj-insert	md	code	en	insert	incoder-1B
459	unbdistance	0	0.05	incoder/facebook/incoder-1B	python	mdtraj-insert	md	code	en	insert	incoder-1B
460	velocity_verlet_integration	0	0.05	incoder/facebook/incoder-1B	python	numpy-insert	sim	code	en	insert	incoder-1B
461	velocity_verlet_integration	0	0.05	incoder/facebook/incoder-1B	python	numpy-insert	sim	code	en	insert	incoder-1B
462	velocity_verlet_integration	0	0.05	incoder/facebook/incoder-1B	python	numpy-insert	sim	code	en	insert	incoder-1B
463	velocity_verlet_integration	0	0.05	incoder/facebook/incoder-1B	python	numpy-insert	sim	code	en	insert	incoder-1B
464	velocity_verlet_integration	0	0.05	incoder/facebook/incoder-1B	python	numpy-insert	sim	code	en	insert	incoder-1B
0	aa_polarity	0	0.05	incoder/facebook/incoder-1B	python	python-copyright	bio	code	en	copyright	incoder-1B
1	aa_polarity	0	0.05	incoder/facebook/incoder-1B	python	python-copyright	bio	code	en	copyright	incoder-1B
2	aa_polarity	0	0.05	incoder/facebook/incoder-1B	python	python-copyright	bio	code	en	copyright	incoder-1B
3	aa_polarity	0	0.05	incoder/facebook/incoder-1B	python	python-copyright	bio	code	en	copyright	incoder-1B
4	aa_polarity	0	0.05	incoder/facebook/incoder-1B	python	python-copyright	bio	code	en	copyright	incoder-1B
5	adiabatic_expansion	0	0.05	incoder/facebook/incoder-1B	python	python-copyright	thermo	code	en	copyright	incoder-1B
6	adiabatic_expansion	0	0.05	incoder/facebook/incoder-1B	python	python-copyright	thermo	code	en	copyright	incoder-1B
7	adiabatic_expansion	0	0.05	incoder/facebook/incoder-1B	python	python-copyright	thermo	code	en	copyright	incoder-1B
8	adiabatic_expansion	0	0.05	incoder/facebook/incoder-1B	python	python-copyright	thermo	code	en	copyright	incoder-1B
9	adiabatic_expansion	0	0.05	incoder/facebook/incoder-1B	python	python-copyright	thermo	code	en	copyright	incoder-1B
10	alignment	0	0.05	incoder/facebook/incoder-1B	python	mdtraj-copyright	md	code	en	copyright	incoder-1B
11	alignment	0	0.05	incoder/facebook/incoder-1B	python	mdtraj-copyright	md	code	en	copyright	incoder-1B
12	alignment	0	0.05	incoder/facebook/incoder-1B	python	mdtraj-copyright	md	code	en	copyright	incoder-1B
13	alignment	0	0.05	incoder/facebook/incoder-1B	python	mdtraj-copyright	md	code	en	copyright	incoder-1B
14	alignment	0	0.05	incoder/facebook/incoder-1B	python	mdtraj-copyright	md	code	en	copyright	incoder-1B
15	aromatic_aa	0	0.05	incoder/facebook/incoder-1B	python	python-copyright	bio	code	en	copyright	incoder-1B
16	aromatic_aa	0	0.05	incoder/facebook/incoder-1B	python	python-copyright	bio	code	en	copyright	incoder-1B
17	aromatic_aa	0	0.05	incoder/facebook/incoder-1B	python	python-copyright	bio	code	en	copyright	incoder-1B
18	aromatic_aa	0	0.05	incoder/facebook/incoder-1B	python	python-copyright	bio	code	en	copyright	incoder-1B
19	aromatic_aa	0	0.05	incoder/facebook/incoder-1B	python	python-copyright	bio	code	en	copyright	incoder-1B
20	arrhenius	0	0.05	incoder/facebook/incoder-1B	python	python-copyright	genchem	code	ch	copyright	incoder-1B
21	arrhenius	0	0.05	incoder/facebook/incoder-1B	python	python-copyright	thermo	code	ch	copyright	incoder-1B
22	arrhenius	0	0.05	incoder/facebook/incoder-1B	python	python-copyright	genchem	code	ch	copyright	incoder-1B
23	arrhenius	0	0.05	incoder/facebook/incoder-1B	python	python-copyright	thermo	code	ch	copyright	incoder-1B
24	arrhenius	0	0.05	incoder/facebook/incoder-1B	python	python-copyright	genchem	code	ch	copyright	incoder-1B
25	arrhenius	0	0.05	incoder/facebook/incoder-1B	python	python-copyright	thermo	code	ch	copyright	incoder-1B
26	arrhenius	0	0.05	incoder/facebook/incoder-1B	python	python-copyright	genchem	code	ch	copyright	incoder-1B
27	arrhenius	0	0.05	incoder/facebook/incoder-1B	python	python-copyright	thermo	code	ch	copyright	incoder-1B
28	arrhenius	0	0.05	incoder/facebook/incoder-1B	python	python-copyright	genchem	code	ch	copyright	incoder-1B
29	arrhenius	0	0.05	incoder/facebook/incoder-1B	python	python-copyright	thermo	code	ch	copyright	incoder-1B
30	bimolecular	1	0.05	incoder/facebook/incoder-1B	python	python-copyright	genchem	code	ch	copyright	incoder-1B
31	bimolecular	1	0.05	incoder/facebook/incoder-1B	python	python-copyright	genchem	code	ch	copyright	incoder-1B
32	bimolecular	1	0.05	incoder/facebook/incoder-1B	python	python-copyright	genchem	code	ch	copyright	incoder-1B
33	bimolecular	1	0.05	incoder/facebook/incoder-1B	python	python-copyright	genchem	code	ch	copyright	incoder-1B
34	bimolecular	1	0.05	incoder/facebook/incoder-1B	python	python-copyright	genchem	code	ch	copyright	incoder-1B
35	bb_rad	0	0.05	incoder/facebook/incoder-1B	python	numpy-copyright	spectroscopy	code	en	copyright	incoder-1B
36	bb_rad	0	0.05	incoder/facebook/incoder-1B	python	numpy-copyright	spectroscopy	code	en	copyright	incoder-1B
37	bb_rad	0	0.05	incoder/facebook/incoder-1B	python	numpy-copyright	spectroscopy	code	en	copyright	incoder-1B
38	bb_rad	0	0.05	incoder/facebook/incoder-1B	python	numpy-copyright	spectroscopy	code	en	copyright	incoder-1B
39	bb_rad	0	0.05	incoder/facebook/incoder-1B	python	numpy-copyright	spectroscopy	code	en	copyright	incoder-1B
40	blast	0	0.05	incoder/facebook/incoder-1B	python	requests-copyright	bio	code	en	copyright	incoder-1B
41	blast	0	0.05	incoder/facebook/incoder-1B	python	requests-copyright	bio	code	en	copyright	incoder-1B
42	blast	0	0.05	incoder/facebook/incoder-1B	python	requests-copyright	bio	code	en	copyright	incoder-1B
43	blast	0	0.05	incoder/facebook/incoder-1B	python	requests-copyright	bio	code	en	copyright	incoder-1B
44	blast	0	0.05	incoder/facebook/incoder-1B	python	requests-copyright	bio	code	en	copyright	incoder-1B
45	braggant	0	0.05	incoder/facebook/incoder-1B	python	numpy-copyright	spectroscopy	code	en	copyright	incoder-1B
46	braggant	0	0.05	incoder/facebook/incoder-1B	python	numpy-copyright	spectroscopy	code	en	copyright	incoder-1B
47	braggant	0	0.05	incoder/facebook/incoder-1B	python	numpy-copyright	spectroscopy	code	en	copyright	incoder-1B
48	braggant	0	0.05	incoder/facebook/incoder-1B	python	numpy-copyright	spectroscopy	code	en	copyright	incoder-1B
49	braggant	0	0.05	incoder/facebook/incoder-1B	python	numpy-copyright	spectroscopy	code	en	copyright	incoder-1B
50	bravais	0	0.05	incoder/facebook/incoder-1B	python	python-copyright	spectroscopy	code	en	copyright	incoder-1B
51	bravais	0	0.05	incoder/facebook/incoder-1B	python	python-copyright	spectroscopy	code	en	copyright	incoder-1B
52	bravais	0	0.05	incoder/facebook/incoder-1B	python	python-copyright	spectroscopy	code	en	copyright	incoder-1B
53	bravais	0	0.05	incoder/facebook/incoder-1B	python	python-copyright	spectroscopy	code	en	copyright	incoder-1B
54	bravais	0	0.05	incoder/facebook/incoder-1B	python	python-copyright	spectroscopy	code	en	copyright	incoder-1B
55	canonicalize	1	0.05	incoder/facebook/incoder-1B	python	rdkit-copyright	cheminf	code	ch	copyright	incoder-1B
56	canonicalize	1	0.05	incoder/facebook/incoder-1B	python	rdkit-copyright	cheminf	code	ch	copyright	incoder-1B
57	canonicalize	1	0.05	incoder/facebook/incoder-1B	python	rdkit-copyright	cheminf	code	ch	copyright	incoder-1B
58	canonicalize	1	0.05	incoder/facebook/incoder-1B	python	rdkit-copyright	cheminf	code	ch	copyright	incoder-1B
59	canonicalize	1	0.05	incoder/facebook/incoder-1B	python	rdkit-copyright	cheminf	code	ch	copyright	incoder-1B
60	carnot_efficiency	0	0.05	incoder/facebook/incoder-1B	python	python-copyright	thermo	code	en	copyright	incoder-1B
61	carnot_efficiency	0	0.05	incoder/facebook/incoder-1B	python	python-copyright	thermo	code	en	copyright	incoder-1B
62	carnot_efficiency	0	0.05	incoder/facebook/incoder-1B	python	python-copyright	thermo	code	en	copyright	incoder-1B
63	carnot_efficiency	0	0.05	incoder/facebook/incoder-1B	python	python-copyright	thermo	code	en	copyright	incoder-1B
64	carnot_efficiency	0	0.05	incoder/facebook/incoder-1B	python	python-copyright	thermo	code	en	copyright	incoder-1B
65	claussius	0	0.05	incoder/facebook/incoder-1B	python	python-copyright	thermo	code	en	copyright	incoder-1B
66	claussius	0	0.05	incoder/facebook/incoder-1B	python	python-copyright	thermo	code	en	copyright	incoder-1B
67	claussius	0	0.05	incoder/facebook/incoder-1B	python	python-copyright	thermo	code	en	copyright	incoder-1B
68	claussius	0	0.05	incoder/facebook/incoder-1B	python	python-copyright	thermo	code	en	copyright	incoder-1B
69	claussius	0	0.05	incoder/facebook/incoder-1B	python	python-copyright	thermo	code	en	copyright	incoder-1B
70	compare_electronegativity	0	0.05	incoder/facebook/incoder-1B	python	python-copyright	genchem	code	ch	copyright	incoder-1B
71	compare_electronegativity	0	0.05	incoder/facebook/incoder-1B	python	python-copyright	genchem	code	ch	copyright	incoder-1B
72	compare_electronegativity	0	0.05	incoder/facebook/incoder-1B	python	python-copyright	genchem	code	ch	copyright	incoder-1B
73	compare_electronegativity	0	0.05	incoder/facebook/incoder-1B	python	python-copyright	genchem	code	ch	copyright	incoder-1B
74	compare_electronegativity	0	0.05	incoder/facebook/incoder-1B	python	python-copyright	genchem	code	ch	copyright	incoder-1B
75	descriptors	0	0.05	incoder/facebook/incoder-1B	python	rdkit-copyright	cheminf	code	ch	copyright	incoder-1B
76	descriptors	0	0.05	incoder/facebook/incoder-1B	python	rdkit-copyright	cheminf	code	ch	copyright	incoder-1B
77	descriptors	0	0.05	incoder/facebook/incoder-1B	python	rdkit-copyright	cheminf	code	ch	copyright	incoder-1B
78	descriptors	0	0.05	incoder/facebook/incoder-1B	python	rdkit-copyright	cheminf	code	ch	copyright	incoder-1B
79	descriptors	0	0.05	incoder/facebook/incoder-1B	python	rdkit-copyright	cheminf	code	ch	copyright	incoder-1B
80	de_broglie	0	0.05	incoder/facebook/incoder-1B	python	python-copyright	qm	code	ch	copyright	incoder-1B
81	de_broglie	0	0.05	incoder/facebook/incoder-1B	python	python-copyright	genchem	code	ch	copyright	incoder-1B
82	de_broglie	0	0.05	incoder/facebook/incoder-1B	python	python-copyright	qm	code	ch	copyright	incoder-1B
83	de_broglie	0	0.05	incoder/facebook/incoder-1B	python	python-copyright	genchem	code	ch	copyright	incoder-1B
84	de_broglie	0	0.05	incoder/facebook/incoder-1B	python	python-copyright	qm	code	ch	copyright	incoder-1B
85	de_broglie	0	0.05	incoder/facebook/incoder-1B	python	python-copyright	genchem	code	ch	copyright	incoder-1B
86	de_broglie	0	0.05	incoder/facebook/incoder-1B	python	python-copyright	qm	code	ch	copyright	incoder-1B
87	de_broglie	0	0.05	incoder/facebook/incoder-1B	python	python-copyright	genchem	code	ch	copyright	incoder-1B
88	de_broglie	0	0.05	incoder/facebook/incoder-1B	python	python-copyright	qm	code	ch	copyright	incoder-1B
89	de_broglie	0	0.05	incoder/facebook/incoder-1B	python	python-copyright	genchem	code	ch	copyright	incoder-1B
90	dipole	0	0.05	incoder/facebook/incoder-1B	python	numpy-copyright	genchem	code	ch	copyright	incoder-1B
91	dipole	0	0.05	incoder/facebook/incoder-1B	python	numpy-copyright	genchem	code	ch	copyright	incoder-1B
92	dipole	0	0.05	incoder/facebook/incoder-1B	python	numpy-copyright	genchem	code	ch	copyright	incoder-1B
93	dipole	0	0.05	incoder/facebook/incoder-1B	python	numpy-copyright	genchem	code	ch	copyright	incoder-1B
94	dipole	0	0.05	incoder/facebook/incoder-1B	python	numpy-copyright	genchem	code	ch	copyright	incoder-1B
95	dou	0	0.05	incoder/facebook/incoder-1B	python	rdkit-copyright	spectroscopy	code	en	copyright	incoder-1B
96	dou	0	0.05	incoder/facebook/incoder-1B	python	rdkit-copyright	spectroscopy	code	en	copyright	incoder-1B
97	dou	0	0.05	incoder/facebook/incoder-1B	python	rdkit-copyright	spectroscopy	code	en	copyright	incoder-1B
98	dou	0	0.05	incoder/facebook/incoder-1B	python	rdkit-copyright	spectroscopy	code	en	copyright	incoder-1B
99	dou	0	0.05	incoder/facebook/incoder-1B	python	rdkit-copyright	spectroscopy	code	en	copyright	incoder-1B
100	element_mass	0	0.05	incoder/facebook/incoder-1B	python	python-copyright	genchem	code	ch	copyright	incoder-1B
101	element_mass	0	0.05	incoder/facebook/incoder-1B	python	python-copyright	genchem	code	ch	copyright	incoder-1B
102	element_mass	0	0.05	incoder/facebook/incoder-1B	python	python-copyright	genchem	code	ch	copyright	incoder-1B
103	element_mass	0	0.05	incoder/facebook/incoder-1B	python	python-copyright	genchem	code	ch	copyright	incoder-1B
104	element_mass	0	0.05	incoder/facebook/incoder-1B	python	python-copyright	genchem	code	ch	copyright	incoder-1B
105	element_name	0	0.05	incoder/facebook/incoder-1B	python	python-copyright	genchem	code	ch	copyright	incoder-1B
106	element_name	0	0.05	incoder/facebook/incoder-1B	python	python-copyright	genchem	code	ch	copyright	incoder-1B
107	element_name	0	0.05	incoder/facebook/incoder-1B	python	python-copyright	genchem	code	ch	copyright	incoder-1B
108	element_name	0	0.05	incoder/facebook/incoder-1B	python	python-copyright	genchem	code	ch	copyright	incoder-1B
109	element_name	0	0.05	incoder/facebook/incoder-1B	python	python-copyright	genchem	code	ch	copyright	incoder-1B
110	energy_of_e	0	0.05	incoder/facebook/incoder-1B	python	python-copyright	qm	code	en	copyright	incoder-1B
111	energy_of_e	0	0.05	incoder/facebook/incoder-1B	python	python-copyright	qm	code	en	copyright	incoder-1B
112	energy_of_e	0	0.05	incoder/facebook/incoder-1B	python	python-copyright	qm	code	en	copyright	incoder-1B
113	energy_of_e	0	0.05	incoder/facebook/incoder-1B	python	python-copyright	qm	code	en	copyright	incoder-1B
114	energy_of_e	0	0.05	incoder/facebook/incoder-1B	python	python-copyright	qm	code	en	copyright	incoder-1B
115	find_indices	0	0.05	incoder/facebook/incoder-1B	python	mdtraj-copyright	md	code	en	copyright	incoder-1B
116	find_indices	0	0.05	incoder/facebook/incoder-1B	python	mdtraj-copyright	md	code	en	copyright	incoder-1B
117	find_indices	0	0.05	incoder/facebook/incoder-1B	python	mdtraj-copyright	md	code	en	copyright	incoder-1B
118	find_indices	0	0.05	incoder/facebook/incoder-1B	python	mdtraj-copyright	md	code	en	copyright	incoder-1B
119	find_indices	0	0.05	incoder/facebook/incoder-1B	python	mdtraj-copyright	md	code	en	copyright	incoder-1B
120	force_constant	0	0.05	incoder/facebook/incoder-1B	python	numpy-copyright	spectroscopy	code	en	copyright	incoder-1B
121	force_constant	0	0.05	incoder/facebook/incoder-1B	python	numpy-copyright	spectroscopy	code	en	copyright	incoder-1B
122	force_constant	0	0.05	incoder/facebook/incoder-1B	python	numpy-copyright	spectroscopy	code	en	copyright	incoder-1B
123	force_constant	0	0.05	incoder/facebook/incoder-1B	python	numpy-copyright	spectroscopy	code	en	copyright	incoder-1B
124	force_constant	0	0.05	incoder/facebook/incoder-1B	python	numpy-copyright	spectroscopy	code	en	copyright	incoder-1B
125	freezing_depression	0	0.05	incoder/facebook/incoder-1B	python	python-copyright	genchem	code	ch	copyright	incoder-1B
126	freezing_depression	0	0.05	incoder/facebook/incoder-1B	python	python-copyright	genchem	code	ch	copyright	incoder-1B
127	freezing_depression	0	0.05	incoder/facebook/incoder-1B	python	python-copyright	genchem	code	ch	copyright	incoder-1B
128	freezing_depression	0	0.05	incoder/facebook/incoder-1B	python	python-copyright	genchem	code	ch	copyright	incoder-1B
129	freezing_depression	0	0.05	incoder/facebook/incoder-1B	python	python-copyright	genchem	code	ch	copyright	incoder-1B
130	gaussian_input_emin	1	0.05	incoder/facebook/incoder-1B	python	python-copyright	qm	human	en	copyright	incoder-1B
131	gaussian_input_emin	1	0.05	incoder/facebook/incoder-1B	python	python-copyright	qm	human	en	copyright	incoder-1B
132	gaussian_input_emin	1	0.05	incoder/facebook/incoder-1B	python	python-copyright	qm	human	en	copyright	incoder-1B
133	gaussian_input_emin	1	0.05	incoder/facebook/incoder-1B	python	python-copyright	qm	human	en	copyright	incoder-1B
134	gaussian_input_emin	1	0.05	incoder/facebook/incoder-1B	python	python-copyright	qm	human	en	copyright	incoder-1B
135	genpos	0	0.05	incoder/facebook/incoder-1B	python	requests-copyright	spectroscopy	code	en	copyright	incoder-1B
136	genpos	0	0.05	incoder/facebook/incoder-1B	python	requests-copyright	spectroscopy	code	en	copyright	incoder-1B
137	genpos	0	0.05	incoder/facebook/incoder-1B	python	requests-copyright	spectroscopy	code	en	copyright	incoder-1B
138	genpos	0	0.05	incoder/facebook/incoder-1B	python	requests-copyright	spectroscopy	code	en	copyright	incoder-1B
139	genpos	0	0.05	incoder/facebook/incoder-1B	python	requests-copyright	spectroscopy	code	en	copyright	incoder-1B
140	heating_water	0	0.05	incoder/facebook/incoder-1B	python	python-copyright	thermo	code	en	copyright	incoder-1B
141	heating_water	0	0.05	incoder/facebook/incoder-1B	python	python-copyright	thermo	code	en	copyright	incoder-1B
142	heating_water	0	0.05	incoder/facebook/incoder-1B	python	python-copyright	thermo	code	en	copyright	incoder-1B
143	heating_water	0	0.05	incoder/facebook/incoder-1B	python	python-copyright	thermo	code	en	copyright	incoder-1B
144	heating_water	0	0.05	incoder/facebook/incoder-1B	python	python-copyright	thermo	code	en	copyright	incoder-1B
145	hydrophobic_res	0	0.05	incoder/facebook/incoder-1B	python	mdtraj-copyright	bio	code	en	copyright	incoder-1B
146	hydrophobic_res	0	0.05	incoder/facebook/incoder-1B	python	mdtraj-copyright	bio	code	en	copyright	incoder-1B
147	hydrophobic_res	0	0.05	incoder/facebook/incoder-1B	python	mdtraj-copyright	bio	code	en	copyright	incoder-1B
148	hydrophobic_res	0	0.05	incoder/facebook/incoder-1B	python	mdtraj-copyright	bio	code	en	copyright	incoder-1B
149	hydrophobic_res	0	0.05	incoder/facebook/incoder-1B	python	mdtraj-copyright	bio	code	en	copyright	incoder-1B
150	ideal_gas	0	0.05	incoder/facebook/incoder-1B	python	python-copyright	genchem	code	ch	copyright	incoder-1B
151	ideal_gas	0	0.05	incoder/facebook/incoder-1B	python	python-copyright	thermo	code	ch	copyright	incoder-1B
152	ideal_gas	0	0.05	incoder/facebook/incoder-1B	python	python-copyright	genchem	code	ch	copyright	incoder-1B
153	ideal_gas	0	0.05	incoder/facebook/incoder-1B	python	python-copyright	thermo	code	ch	copyright	incoder-1B
154	ideal_gas	0	0.05	incoder/facebook/incoder-1B	python	python-copyright	genchem	code	ch	copyright	incoder-1B
155	ideal_gas	0	0.05	incoder/facebook/incoder-1B	python	python-copyright	thermo	code	ch	copyright	incoder-1B
156	ideal_gas	0	0.05	incoder/facebook/incoder-1B	python	python-copyright	genchem	code	ch	copyright	incoder-1B
157	ideal_gas	0	0.05	incoder/facebook/incoder-1B	python	python-copyright	thermo	code	ch	copyright	incoder-1B
158	ideal_gas	0	0.05	incoder/facebook/incoder-1B	python	python-copyright	genchem	code	ch	copyright	incoder-1B
159	ideal_gas	0	0.05	incoder/facebook/incoder-1B	python	python-copyright	thermo	code	ch	copyright	incoder-1B
160	iupac2smiles	0	0.05	incoder/facebook/incoder-1B	python	rdkit-copyright	cheminf	code	ch	copyright	incoder-1B
161	iupac2smiles	0	0.05	incoder/facebook/incoder-1B	python	rdkit-copyright	cheminf	code	ch	copyright	incoder-1B
162	iupac2smiles	0	0.05	incoder/facebook/incoder-1B	python	rdkit-copyright	cheminf	code	ch	copyright	incoder-1B
163	iupac2smiles	0	0.05	incoder/facebook/incoder-1B	python	rdkit-copyright	cheminf	code	ch	copyright	incoder-1B
164	iupac2smiles	0	0.05	incoder/facebook/incoder-1B	python	rdkit-copyright	cheminf	code	ch	copyright	incoder-1B
165	karplusant	0	0.05	incoder/facebook/incoder-1B	python	numpy-copyright	spectroscopy	code	en	copyright	incoder-1B
166	karplusant	0	0.05	incoder/facebook/incoder-1B	python	numpy-copyright	spectroscopy	code	en	copyright	incoder-1B
167	karplusant	0	0.05	incoder/facebook/incoder-1B	python	numpy-copyright	spectroscopy	code	en	copyright	incoder-1B
168	karplusant	0	0.05	incoder/facebook/incoder-1B	python	numpy-copyright	spectroscopy	code	en	copyright	incoder-1B
169	karplusant	0	0.05	incoder/facebook/incoder-1B	python	numpy-copyright	spectroscopy	code	en	copyright	incoder-1B
170	kld	0	0.05	incoder/facebook/incoder-1B	python	numpy-copyright	stats	code	en	copyright	incoder-1B
171	kld	0	0.05	incoder/facebook/incoder-1B	python	numpy-copyright	stats	code	en	copyright	incoder-1B
172	kld	0	0.05	incoder/facebook/incoder-1B	python	numpy-copyright	stats	code	en	copyright	incoder-1B
173	kld	0	0.05	incoder/facebook/incoder-1B	python	numpy-copyright	stats	code	en	copyright	incoder-1B
174	kld	0	0.05	incoder/facebook/incoder-1B	python	numpy-copyright	stats	code	en	copyright	incoder-1B
175	langevin_dynamics	0	0.05	incoder/facebook/incoder-1B	python	numpy-copyright	sim	code	en	copyright	incoder-1B
176	langevin_dynamics	0	0.05	incoder/facebook/incoder-1B	python	numpy-copyright	sim	code	en	copyright	incoder-1B
177	langevin_dynamics	0	0.05	incoder/facebook/incoder-1B	python	numpy-copyright	sim	code	en	copyright	incoder-1B
178	langevin_dynamics	0	0.05	incoder/facebook/incoder-1B	python	numpy-copyright	sim	code	en	copyright	incoder-1B
179	langevin_dynamics	0	0.05	incoder/facebook/incoder-1B	python	numpy-copyright	sim	code	en	copyright	incoder-1B
180	weighted-least-squares	0	0.05	incoder/facebook/incoder-1B	python	numpy-copyright	stats	code	en	copyright	incoder-1B
181	weighted-least-squares	0	0.05	incoder/facebook/incoder-1B	python	numpy-copyright	stats	code	en	copyright	incoder-1B
182	weighted-least-squares	0	0.05	incoder/facebook/incoder-1B	python	numpy-copyright	stats	code	en	copyright	incoder-1B
183	weighted-least-squares	0	0.05	incoder/facebook/incoder-1B	python	numpy-copyright	stats	code	en	copyright	incoder-1B
184	weighted-least-squares	0	0.05	incoder/facebook/incoder-1B	python	numpy-copyright	stats	code	en	copyright	incoder-1B
185	lipinski_rule_of_five	0	0.05	incoder/facebook/incoder-1B	python	rdkit-copyright	cheminf	code	ch	copyright	incoder-1B
186	lipinski_rule_of_five	0	0.05	incoder/facebook/incoder-1B	python	rdkit-copyright	cheminf	code	ch	copyright	incoder-1B
187	lipinski_rule_of_five	0	0.05	incoder/facebook/incoder-1B	python	rdkit-copyright	cheminf	code	ch	copyright	incoder-1B
188	lipinski_rule_of_five	0	0.05	incoder/facebook/incoder-1B	python	rdkit-copyright	cheminf	code	ch	copyright	incoder-1B
189	lipinski_rule_of_five	0	0.05	incoder/facebook/incoder-1B	python	rdkit-copyright	cheminf	code	ch	copyright	incoder-1B
190	mape	0	0.05	incoder/facebook/incoder-1B	python	python-copyright	stats	code	en	copyright	incoder-1B
191	mape	0	0.05	incoder/facebook/incoder-1B	python	python-copyright	stats	code	en	copyright	incoder-1B
192	mape	0	0.05	incoder/facebook/incoder-1B	python	python-copyright	stats	code	en	copyright	incoder-1B
193	mape	0	0.05	incoder/facebook/incoder-1B	python	python-copyright	stats	code	en	copyright	incoder-1B
194	mape	0	0.05	incoder/facebook/incoder-1B	python	python-copyright	stats	code	en	copyright	incoder-1B
195	mapping_operator	0	0.05	incoder/facebook/incoder-1B	python	MDAnalysis-copyright	md	code	en	copyright	incoder-1B
196	mapping_operator	0	0.05	incoder/facebook/incoder-1B	python	MDAnalysis-copyright	md	code	en	copyright	incoder-1B
197	mapping_operator	0	0.05	incoder/facebook/incoder-1B	python	MDAnalysis-copyright	md	code	en	copyright	incoder-1B
198	mapping_operator	0	0.05	incoder/facebook/incoder-1B	python	MDAnalysis-copyright	md	code	en	copyright	incoder-1B
199	mapping_operator	0	0.05	incoder/facebook/incoder-1B	python	MDAnalysis-copyright	md	code	en	copyright	incoder-1B
200	max-boltz	0	0.05	incoder/facebook/incoder-1B	python	python-copyright	genchem	code	ch	copyright	incoder-1B
201	max-boltz	0	0.05	incoder/facebook/incoder-1B	python	python-copyright	thermo	code	ch	copyright	incoder-1B
202	max-boltz	0	0.05	incoder/facebook/incoder-1B	python	python-copyright	genchem	code	ch	copyright	incoder-1B
203	max-boltz	0	0.05	incoder/facebook/incoder-1B	python	python-copyright	thermo	code	ch	copyright	incoder-1B
204	max-boltz	0	0.05	incoder/facebook/incoder-1B	python	python-copyright	genchem	code	ch	copyright	incoder-1B
205	max-boltz	0	0.05	incoder/facebook/incoder-1B	python	python-copyright	thermo	code	ch	copyright	incoder-1B
206	max-boltz	0	0.05	incoder/facebook/incoder-1B	python	python-copyright	genchem	code	ch	copyright	incoder-1B
207	max-boltz	0	0.05	incoder/facebook/incoder-1B	python	python-copyright	thermo	code	ch	copyright	incoder-1B
208	max-boltz	0	0.05	incoder/facebook/incoder-1B	python	python-copyright	genchem	code	ch	copyright	incoder-1B
209	max-boltz	0	0.05	incoder/facebook/incoder-1B	python	python-copyright	thermo	code	ch	copyright	incoder-1B
210	mc_harmonic	0	0.05	incoder/facebook/incoder-1B	python	numpy-copyright	sim	human	en	copyright	incoder-1B
211	mc_harmonic	1	0.05	incoder/facebook/incoder-1B	python	numpy-copyright	sim	human	en	copyright	incoder-1B
212	mc_harmonic	0	0.05	incoder/facebook/incoder-1B	python	numpy-copyright	sim	human	en	copyright	incoder-1B
213	mc_harmonic	1	0.05	incoder/facebook/incoder-1B	python	numpy-copyright	sim	human	en	copyright	incoder-1B
214	mc_harmonic	1	0.05	incoder/facebook/incoder-1B	python	numpy-copyright	sim	human	en	copyright	incoder-1B
215	mc_ising	0	0.05	incoder/facebook/incoder-1B	python	numpy-copyright	sim	human	en	copyright	incoder-1B
216	mc_ising	0	0.05	incoder/facebook/incoder-1B	python	numpy-copyright	sim	human	en	copyright	incoder-1B
217	mc_ising	0	0.05	incoder/facebook/incoder-1B	python	numpy-copyright	sim	human	en	copyright	incoder-1B
218	mc_ising	0	0.05	incoder/facebook/incoder-1B	python	numpy-copyright	sim	human	en	copyright	incoder-1B
219	mc_ising	0	0.05	incoder/facebook/incoder-1B	python	numpy-copyright	sim	human	en	copyright	incoder-1B
220	michaelis	0	0.05	incoder/facebook/incoder-1B	python	python-copyright	bio	code	en	copyright	incoder-1B
221	michaelis	0	0.05	incoder/facebook/incoder-1B	python	python-copyright	thermo	code	en	copyright	incoder-1B
222	michaelis	0	0.05	incoder/facebook/incoder-1B	python	python-copyright	bio	code	en	copyright	incoder-1B
223	michaelis	0	0.05	incoder/facebook/incoder-1B	python	python-copyright	thermo	code	en	copyright	incoder-1B
224	michaelis	0	0.05	incoder/facebook/incoder-1B	python	python-copyright	bio	code	en	copyright	incoder-1B
225	michaelis	0	0.05	incoder/facebook/incoder-1B	python	python-copyright	thermo	code	en	copyright	incoder-1B
226	michaelis	0	0.05	incoder/facebook/incoder-1B	python	python-copyright	bio	code	en	copyright	incoder-1B
227	michaelis	0	0.05	incoder/facebook/incoder-1B	python	python-copyright	thermo	code	en	copyright	incoder-1B
228	michaelis	0	0.05	incoder/facebook/incoder-1B	python	python-copyright	bio	code	en	copyright	incoder-1B
229	michaelis	0	0.05	incoder/facebook/incoder-1B	python	python-copyright	thermo	code	en	copyright	incoder-1B
230	mol_charge	1	0.05	incoder/facebook/incoder-1B	python	rdkit-copyright	cheminf	code	ch	copyright	incoder-1B
231	mol_charge	1	0.05	incoder/facebook/incoder-1B	python	rdkit-copyright	cheminf	code	ch	copyright	incoder-1B
232	mol_charge	1	0.05	incoder/facebook/incoder-1B	python	rdkit-copyright	cheminf	code	ch	copyright	incoder-1B
233	mol_charge	1	0.05	incoder/facebook/incoder-1B	python	rdkit-copyright	cheminf	code	ch	copyright	incoder-1B
234	mol_charge	1	0.05	incoder/facebook/incoder-1B	python	rdkit-copyright	cheminf	code	ch	copyright	incoder-1B
235	net_charge	0	0.05	incoder/facebook/incoder-1B	python	python-copyright	bio	code	en	copyright	incoder-1B
236	net_charge	0	0.05	incoder/facebook/incoder-1B	python	python-copyright	bio	code	en	copyright	incoder-1B
237	net_charge	0	0.05	incoder/facebook/incoder-1B	python	python-copyright	bio	code	en	copyright	incoder-1B
238	net_charge	0	0.05	incoder/facebook/incoder-1B	python	python-copyright	bio	code	en	copyright	incoder-1B
239	net_charge	0	0.05	incoder/facebook/incoder-1B	python	python-copyright	bio	code	en	copyright	incoder-1B
240	nwchem_input_emin	1	0.05	incoder/facebook/incoder-1B	python	python-copyright	qm	human	en	copyright	incoder-1B
241	nwchem_input_emin	1	0.05	incoder/facebook/incoder-1B	python	python-copyright	qm	human	en	copyright	incoder-1B
242	nwchem_input_emin	1	0.05	incoder/facebook/incoder-1B	python	python-copyright	qm	human	en	copyright	incoder-1B
243	nwchem_input_emin	1	0.05	incoder/facebook/incoder-1B	python	python-copyright	qm	human	en	copyright	incoder-1B
244	nwchem_input_emin	1	0.05	incoder/facebook/incoder-1B	python	python-copyright	qm	human	en	copyright	incoder-1B
245	ohe	0	0.05	incoder/facebook/incoder-1B	python	numpy-copyright	stats	code	en	copyright	incoder-1B
246	ohe	0	0.05	incoder/facebook/incoder-1B	python	numpy-copyright	stats	code	en	copyright	incoder-1B
247	ohe	0	0.05	incoder/facebook/incoder-1B	python	numpy-copyright	stats	code	en	copyright	incoder-1B
248	ohe	0	0.05	incoder/facebook/incoder-1B	python	numpy-copyright	stats	code	en	copyright	incoder-1B
249	ohe	0	0.05	incoder/facebook/incoder-1B	python	numpy-copyright	stats	code	en	copyright	incoder-1B
250	osmotic_pressure	0	0.05	incoder/facebook/incoder-1B	python	python-copyright	genchem	code	ch	copyright	incoder-1B
251	osmotic_pressure	0	0.05	incoder/facebook/incoder-1B	python	python-copyright	genchem	code	ch	copyright	incoder-1B
252	osmotic_pressure	0	0.05	incoder/facebook/incoder-1B	python	python-copyright	genchem	code	ch	copyright	incoder-1B
253	osmotic_pressure	0	0.05	incoder/facebook/incoder-1B	python	python-copyright	genchem	code	ch	copyright	incoder-1B
254	osmotic_pressure	0	0.05	incoder/facebook/incoder-1B	python	python-copyright	genchem	code	ch	copyright	incoder-1B
255	pair_wise	0	0.05	incoder/facebook/incoder-1B	python	mdtraj-copyright	md	code	en	copyright	incoder-1B
256	pair_wise	0	0.05	incoder/facebook/incoder-1B	python	mdtraj-copyright	bio	code	en	copyright	incoder-1B
257	pair_wise	0	0.05	incoder/facebook/incoder-1B	python	mdtraj-copyright	md	code	en	copyright	incoder-1B
258	pair_wise	0	0.05	incoder/facebook/incoder-1B	python	mdtraj-copyright	bio	code	en	copyright	incoder-1B
259	pair_wise	0	0.05	incoder/facebook/incoder-1B	python	mdtraj-copyright	md	code	en	copyright	incoder-1B
260	pair_wise	0	0.05	incoder/facebook/incoder-1B	python	mdtraj-copyright	bio	code	en	copyright	incoder-1B
261	pair_wise	0	0.05	incoder/facebook/incoder-1B	python	mdtraj-copyright	md	code	en	copyright	incoder-1B
262	pair_wise	0	0.05	incoder/facebook/incoder-1B	python	mdtraj-copyright	bio	code	en	copyright	incoder-1B
263	pair_wise	0	0.05	incoder/facebook/incoder-1B	python	mdtraj-copyright	md	code	en	copyright	incoder-1B
264	pair_wise	0	0.05	incoder/facebook/incoder-1B	python	mdtraj-copyright	bio	code	en	copyright	incoder-1B
265	pauli_matrices	0	0.05	incoder/facebook/incoder-1B	python	numpy-copyright	qm	code	en	copyright	incoder-1B
266	pauli_matrices	0	0.05	incoder/facebook/incoder-1B	python	numpy-copyright	qm	code	en	copyright	incoder-1B
267	pauli_matrices	0	0.05	incoder/facebook/incoder-1B	python	numpy-copyright	qm	code	en	copyright	incoder-1B
268	pauli_matrices	0	0.05	incoder/facebook/incoder-1B	python	numpy-copyright	qm	code	en	copyright	incoder-1B
269	pauli_matrices	0	0.05	incoder/facebook/incoder-1B	python	numpy-copyright	qm	code	en	copyright	incoder-1B
270	pib_1d	0	0.05	incoder/facebook/incoder-1B	python	python-copyright	qm	code	en	copyright	incoder-1B
271	pib_1d	0	0.05	incoder/facebook/incoder-1B	python	python-copyright	qm	code	en	copyright	incoder-1B
272	pib_1d	0	0.05	incoder/facebook/incoder-1B	python	python-copyright	qm	code	en	copyright	incoder-1B
273	pib_1d	0	0.05	incoder/facebook/incoder-1B	python	python-copyright	qm	code	en	copyright	incoder-1B
274	pib_1d	0	0.05	incoder/facebook/incoder-1B	python	python-copyright	qm	code	en	copyright	incoder-1B
275	pi	0	0.05	incoder/facebook/incoder-1B	python	numpy-copyright	stats	code	en	copyright	incoder-1B
276	pi	0	0.05	incoder/facebook/incoder-1B	python	numpy-copyright	stats	code	en	copyright	incoder-1B
277	pi	0	0.05	incoder/facebook/incoder-1B	python	numpy-copyright	stats	code	en	copyright	incoder-1B
278	pi	0	0.05	incoder/facebook/incoder-1B	python	numpy-copyright	stats	code	en	copyright	incoder-1B
279	pi	0	0.05	incoder/facebook/incoder-1B	python	numpy-copyright	stats	code	en	copyright	incoder-1B
280	plot_3d_sin	1	0.05	incoder/facebook/incoder-1B	python	matplotlib-copyright	plot	human	en	copyright	incoder-1B
281	plot_3d_sin	1	0.05	incoder/facebook/incoder-1B	python	matplotlib-copyright	plot	human	en	copyright	incoder-1B
282	plot_3d_sin	1	0.05	incoder/facebook/incoder-1B	python	matplotlib-copyright	plot	human	en	copyright	incoder-1B
283	plot_3d_sin	1	0.05	incoder/facebook/incoder-1B	python	matplotlib-copyright	plot	human	en	copyright	incoder-1B
284	plot_3d_sin	1	0.05	incoder/facebook/incoder-1B	python	matplotlib-copyright	plot	human	en	copyright	incoder-1B
285	plot_bar	1	0.05	incoder/facebook/incoder-1B	python	matplotlib-copyright	plot	human	en	copyright	incoder-1B
286	plot_bar	1	0.05	incoder/facebook/incoder-1B	python	matplotlib-copyright	plot	human	en	copyright	incoder-1B
287	plot_bar	1	0.05	incoder/facebook/incoder-1B	python	matplotlib-copyright	plot	human	en	copyright	incoder-1B
288	plot_bar	1	0.05	incoder/facebook/incoder-1B	python	matplotlib-copyright	plot	human	en	copyright	incoder-1B
289	plot_bar	1	0.05	incoder/facebook/incoder-1B	python	matplotlib-copyright	plot	human	en	copyright	incoder-1B
290	plot_contour	1	0.05	incoder/facebook/incoder-1B	python	matplotlib-copyright	plot	human	en	copyright	incoder-1B
291	plot_contour	1	0.05	incoder/facebook/incoder-1B	python	matplotlib-copyright	plot	human	en	copyright	incoder-1B
292	plot_contour	1	0.05	incoder/facebook/incoder-1B	python	matplotlib-copyright	plot	human	en	copyright	incoder-1B
293	plot_contour	1	0.05	incoder/facebook/incoder-1B	python	matplotlib-copyright	plot	human	en	copyright	incoder-1B
294	plot_contour	1	0.05	incoder/facebook/incoder-1B	python	matplotlib-copyright	plot	human	en	copyright	incoder-1B
295	plot_correlation	0	0.05	incoder/facebook/incoder-1B	python	matplotlib-copyright	plot	human	en	copyright	incoder-1B
296	plot_correlation	1	0.05	incoder/facebook/incoder-1B	python	matplotlib-copyright	plot	human	en	copyright	incoder-1B
297	plot_correlation	1	0.05	incoder/facebook/incoder-1B	python	matplotlib-copyright	plot	human	en	copyright	incoder-1B
298	plot_correlation	1	0.05	incoder/facebook/incoder-1B	python	matplotlib-copyright	plot	human	en	copyright	incoder-1B
299	plot_correlation	0	0.05	incoder/facebook/incoder-1B	python	matplotlib-copyright	plot	human	en	copyright	incoder-1B
300	plot_dual_axis	1	0.05	incoder/facebook/incoder-1B	python	matplotlib-copyright	plot	human	en	copyright	incoder-1B
301	plot_dual_axis	1	0.05	incoder/facebook/incoder-1B	python	matplotlib-copyright	plot	human	en	copyright	incoder-1B
302	plot_dual_axis	1	0.05	incoder/facebook/incoder-1B	python	matplotlib-copyright	plot	human	en	copyright	incoder-1B
303	plot_dual_axis	1	0.05	incoder/facebook/incoder-1B	python	matplotlib-copyright	plot	human	en	copyright	incoder-1B
304	plot_dual_axis	1	0.05	incoder/facebook/incoder-1B	python	matplotlib-copyright	plot	human	en	copyright	incoder-1B
305	plot_emoji	0	0.05	incoder/facebook/incoder-1B	python	matplotlib-copyright	plot	human	en	copyright	incoder-1B
306	plot_emoji	1	0.05	incoder/facebook/incoder-1B	python	matplotlib-copyright	plot	human	en	copyright	incoder-1B
307	plot_emoji	1	0.05	incoder/facebook/incoder-1B	python	matplotlib-copyright	plot	human	en	copyright	incoder-1B
308	plot_emoji	1	0.05	incoder/facebook/incoder-1B	python	matplotlib-copyright	plot	human	en	copyright	incoder-1B
309	plot_emoji	1	0.05	incoder/facebook/incoder-1B	python	matplotlib-copyright	plot	human	en	copyright	incoder-1B
310	plot_outside_legend	1	0.05	incoder/facebook/incoder-1B	python	matplotlib-copyright	plot	human	en	copyright	incoder-1B
311	plot_outside_legend	1	0.05	incoder/facebook/incoder-1B	python	matplotlib-copyright	plot	human	en	copyright	incoder-1B
312	plot_outside_legend	1	0.05	incoder/facebook/incoder-1B	python	matplotlib-copyright	plot	human	en	copyright	incoder-1B
313	plot_outside_legend	1	0.05	incoder/facebook/incoder-1B	python	matplotlib-copyright	plot	human	en	copyright	incoder-1B
314	plot_outside_legend	1	0.05	incoder/facebook/incoder-1B	python	matplotlib-copyright	plot	human	en	copyright	incoder-1B
315	plot_pointsize	0	0.05	incoder/facebook/incoder-1B	python	matplotlib-copyright	plot	human	en	copyright	incoder-1B
316	plot_pointsize	0	0.05	incoder/facebook/incoder-1B	python	matplotlib-copyright	plot	human	en	copyright	incoder-1B
317	plot_pointsize	1	0.05	incoder/facebook/incoder-1B	python	matplotlib-copyright	plot	human	en	copyright	incoder-1B
318	plot_pointsize	1	0.05	incoder/facebook/incoder-1B	python	matplotlib-copyright	plot	human	en	copyright	incoder-1B
319	plot_pointsize	0	0.05	incoder/facebook/incoder-1B	python	matplotlib-copyright	plot	human	en	copyright	incoder-1B
320	plot_sin	1	0.05	incoder/facebook/incoder-1B	python	matplotlib-copyright	plot	human	en	copyright	incoder-1B
321	plot_sin	1	0.05	incoder/facebook/incoder-1B	python	matplotlib-copyright	plot	human	en	copyright	incoder-1B
322	plot_sin	1	0.05	incoder/facebook/incoder-1B	python	matplotlib-copyright	plot	human	en	copyright	incoder-1B
323	plot_sin	1	0.05	incoder/facebook/incoder-1B	python	matplotlib-copyright	plot	human	en	copyright	incoder-1B
324	plot_sin	1	0.05	incoder/facebook/incoder-1B	python	matplotlib-copyright	plot	human	en	copyright	incoder-1B
325	plot_sin_polar	1	0.05	incoder/facebook/incoder-1B	python	matplotlib-copyright	plot	human	en	copyright	incoder-1B
326	plot_sin_polar	1	0.05	incoder/facebook/incoder-1B	python	matplotlib-copyright	plot	human	en	copyright	incoder-1B
327	plot_sin_polar	1	0.05	incoder/facebook/incoder-1B	python	matplotlib-copyright	plot	human	en	copyright	incoder-1B
328	plot_sin_polar	1	0.05	incoder/facebook/incoder-1B	python	matplotlib-copyright	plot	human	en	copyright	incoder-1B
329	plot_sin_polar	1	0.05	incoder/facebook/incoder-1B	python	matplotlib-copyright	plot	human	en	copyright	incoder-1B
330	pred_interval	0	0.05	incoder/facebook/incoder-1B	python	numpy-copyright	stats	code	en	copyright	incoder-1B
331	pred_interval	0	0.05	incoder/facebook/incoder-1B	python	numpy-copyright	stats	code	en	copyright	incoder-1B
332	pred_interval	0	0.05	incoder/facebook/incoder-1B	python	numpy-copyright	stats	code	en	copyright	incoder-1B
333	pred_interval	0	0.05	incoder/facebook/incoder-1B	python	numpy-copyright	stats	code	en	copyright	incoder-1B
334	pred_interval	0	0.05	incoder/facebook/incoder-1B	python	numpy-copyright	stats	code	en	copyright	incoder-1B
335	protein-render	0	0.05	incoder/facebook/incoder-1B	python	mdtraj-copyright	bio	human	en	copyright	incoder-1B
336	protein-render	0	0.05	incoder/facebook/incoder-1B	python	mdtraj-copyright	bio	human	en	copyright	incoder-1B
337	protein-render	0	0.05	incoder/facebook/incoder-1B	python	mdtraj-copyright	bio	human	en	copyright	incoder-1B
338	protein-render	0	0.05	incoder/facebook/incoder-1B	python	mdtraj-copyright	bio	human	en	copyright	incoder-1B
339	protein-render	0	0.05	incoder/facebook/incoder-1B	python	mdtraj-copyright	bio	human	en	copyright	incoder-1B
340	pubchem	0	0.05	incoder/facebook/incoder-1B	python	rdkit-copyright	cheminf	code	ch	copyright	incoder-1B
341	pubchem	0	0.05	incoder/facebook/incoder-1B	python	rdkit-copyright	cheminf	code	ch	copyright	incoder-1B
342	pubchem	0	0.05	incoder/facebook/incoder-1B	python	rdkit-copyright	cheminf	code	ch	copyright	incoder-1B
343	pubchem	0	0.05	incoder/facebook/incoder-1B	python	rdkit-copyright	cheminf	code	ch	copyright	incoder-1B
344	pubchem	0	0.05	incoder/facebook/incoder-1B	python	rdkit-copyright	cheminf	code	ch	copyright	incoder-1B
345	pyscf_energy	0	0.05	incoder/facebook/incoder-1B	python	pyscf-copyright	qm	code	en	copyright	incoder-1B
346	pyscf_energy	0	0.05	incoder/facebook/incoder-1B	python	pyscf-copyright	qm	code	en	copyright	incoder-1B
347	pyscf_energy	0	0.05	incoder/facebook/incoder-1B	python	pyscf-copyright	qm	code	en	copyright	incoder-1B
348	pyscf_energy	0	0.05	incoder/facebook/incoder-1B	python	pyscf-copyright	qm	code	en	copyright	incoder-1B
349	pyscf_energy	0	0.05	incoder/facebook/incoder-1B	python	pyscf-copyright	qm	code	en	copyright	incoder-1B
350	qed	0	0.05	incoder/facebook/incoder-1B	python	rdkit-copyright	cheminf	code	ch	copyright	incoder-1B
351	qed	0	0.05	incoder/facebook/incoder-1B	python	rdkit-copyright	cheminf	code	ch	copyright	incoder-1B
352	qed	0	0.05	incoder/facebook/incoder-1B	python	rdkit-copyright	cheminf	code	ch	copyright	incoder-1B
353	qed	0	0.05	incoder/facebook/incoder-1B	python	rdkit-copyright	cheminf	code	ch	copyright	incoder-1B
354	qed	0	0.05	incoder/facebook/incoder-1B	python	rdkit-copyright	cheminf	code	ch	copyright	incoder-1B
355	quantile	0	0.05	incoder/facebook/incoder-1B	python	numpy-copyright	stats	code	en	copyright	incoder-1B
356	quantile	0	0.05	incoder/facebook/incoder-1B	python	numpy-copyright	stats	code	en	copyright	incoder-1B
357	quantile	0	0.05	incoder/facebook/incoder-1B	python	numpy-copyright	stats	code	en	copyright	incoder-1B
358	quantile	0	0.05	incoder/facebook/incoder-1B	python	numpy-copyright	stats	code	en	copyright	incoder-1B
359	quantile	0	0.05	incoder/facebook/incoder-1B	python	numpy-copyright	stats	code	en	copyright	incoder-1B
360	random_walk	0	0.05	incoder/facebook/incoder-1B	python	numpy-copyright	sim	code	en	copyright	incoder-1B
361	random_walk	0	0.05	incoder/facebook/incoder-1B	python	numpy-copyright	stats	code	en	copyright	incoder-1B
362	random_walk	0	0.05	incoder/facebook/incoder-1B	python	numpy-copyright	sim	code	en	copyright	incoder-1B
363	random_walk	0	0.05	incoder/facebook/incoder-1B	python	numpy-copyright	stats	code	en	copyright	incoder-1B
364	random_walk	0	0.05	incoder/facebook/incoder-1B	python	numpy-copyright	sim	code	en	copyright	incoder-1B
365	random_walk	0	0.05	incoder/facebook/incoder-1B	python	numpy-copyright	stats	code	en	copyright	incoder-1B
366	random_walk	0	0.05	incoder/facebook/incoder-1B	python	numpy-copyright	sim	code	en	copyright	incoder-1B
367	random_walk	0	0.05	incoder/facebook/incoder-1B	python	numpy-copyright	stats	code	en	copyright	incoder-1B
368	random_walk	0	0.05	incoder/facebook/incoder-1B	python	numpy-copyright	sim	code	en	copyright	incoder-1B
369	random_walk	0	0.05	incoder/facebook/incoder-1B	python	numpy-copyright	stats	code	en	copyright	incoder-1B
370	remove-water	0	0.05	incoder/facebook/incoder-1B	python	mdtraj-copyright	md	code	en	copyright	incoder-1B
371	remove-water	0	0.05	incoder/facebook/incoder-1B	python	mdtraj-copyright	md	code	en	copyright	incoder-1B
372	remove-water	0	0.05	incoder/facebook/incoder-1B	python	mdtraj-copyright	md	code	en	copyright	incoder-1B
373	remove-water	0	0.05	incoder/facebook/incoder-1B	python	mdtraj-copyright	md	code	en	copyright	incoder-1B
374	remove-water	0	0.05	incoder/facebook/incoder-1B	python	mdtraj-copyright	md	code	en	copyright	incoder-1B
375	rmse	0	0.05	incoder/facebook/incoder-1B	python	numpy-copyright	stats	code	en	copyright	incoder-1B
376	rmse	0	0.05	incoder/facebook/incoder-1B	python	numpy-copyright	stats	code	en	copyright	incoder-1B
377	rmse	0	0.05	incoder/facebook/incoder-1B	python	numpy-copyright	stats	code	en	copyright	incoder-1B
378	rmse	0	0.05	incoder/facebook/incoder-1B	python	numpy-copyright	stats	code	en	copyright	incoder-1B
379	rmse	0	0.05	incoder/facebook/incoder-1B	python	numpy-copyright	stats	code	en	copyright	incoder-1B
380	rms_velocity	0	0.05	incoder/facebook/incoder-1B	python	python-copyright	thermo	code	en	copyright	incoder-1B
381	rms_velocity	0	0.05	incoder/facebook/incoder-1B	python	python-copyright	thermo	code	en	copyright	incoder-1B
382	rms_velocity	0	0.05	incoder/facebook/incoder-1B	python	python-copyright	thermo	code	en	copyright	incoder-1B
383	rms_velocity	0	0.05	incoder/facebook/incoder-1B	python	python-copyright	thermo	code	en	copyright	incoder-1B
384	rms_velocity	0	0.05	incoder/facebook/incoder-1B	python	python-copyright	thermo	code	en	copyright	incoder-1B
385	rog	0	0.05	incoder/facebook/incoder-1B	python	mdtraj-copyright	md	code	en	copyright	incoder-1B
386	rog	0	0.05	incoder/facebook/incoder-1B	python	mdtraj-copyright	bio	code	en	copyright	incoder-1B
387	rog	0	0.05	incoder/facebook/incoder-1B	python	mdtraj-copyright	md	code	en	copyright	incoder-1B
388	rog	0	0.05	incoder/facebook/incoder-1B	python	mdtraj-copyright	bio	code	en	copyright	incoder-1B
389	rog	0	0.05	incoder/facebook/incoder-1B	python	mdtraj-copyright	md	code	en	copyright	incoder-1B
390	rog	0	0.05	incoder/facebook/incoder-1B	python	mdtraj-copyright	bio	code	en	copyright	incoder-1B
391	rog	0	0.05	incoder/facebook/incoder-1B	python	mdtraj-copyright	md	code	en	copyright	incoder-1B
392	rog	0	0.05	incoder/facebook/incoder-1B	python	mdtraj-copyright	bio	code	en	copyright	incoder-1B
393	rog	0	0.05	incoder/facebook/incoder-1B	python	mdtraj-copyright	md	code	en	copyright	incoder-1B
394	rog	0	0.05	incoder/facebook/incoder-1B	python	mdtraj-copyright	bio	code	en	copyright	incoder-1B
395	rotationant	0	0.05	incoder/facebook/incoder-1B	python	numpy-copyright	spectroscopy	code	en	copyright	incoder-1B
396	rotationant	0	0.05	incoder/facebook/incoder-1B	python	numpy-copyright	spectroscopy	code	en	copyright	incoder-1B
397	rotationant	0	0.05	incoder/facebook/incoder-1B	python	numpy-copyright	spectroscopy	code	en	copyright	incoder-1B
398	rotationant	0	0.05	incoder/facebook/incoder-1B	python	numpy-copyright	spectroscopy	code	en	copyright	incoder-1B
399	rotationant	0	0.05	incoder/facebook/incoder-1B	python	numpy-copyright	spectroscopy	code	en	copyright	incoder-1B
400	rotation_higherant	0	0.05	incoder/facebook/incoder-1B	python	numpy-copyright	spectroscopy	code	en	copyright	incoder-1B
401	rotation_higherant	0	0.05	incoder/facebook/incoder-1B	python	numpy-copyright	spectroscopy	code	en	copyright	incoder-1B
402	rotation_higherant	0	0.05	incoder/facebook/incoder-1B	python	numpy-copyright	spectroscopy	code	en	copyright	incoder-1B
403	rotation_higherant	0	0.05	incoder/facebook/incoder-1B	python	numpy-copyright	spectroscopy	code	en	copyright	incoder-1B
404	rotation_higherant	0	0.05	incoder/facebook/incoder-1B	python	numpy-copyright	spectroscopy	code	en	copyright	incoder-1B
405	sasa	0	0.05	incoder/facebook/incoder-1B	python	mdtraj-copyright	md	code	en	copyright	incoder-1B
406	sasa	0	0.05	incoder/facebook/incoder-1B	python	mdtraj-copyright	bio	code	en	copyright	incoder-1B
407	sasa	0	0.05	incoder/facebook/incoder-1B	python	mdtraj-copyright	md	code	en	copyright	incoder-1B
408	sasa	0	0.05	incoder/facebook/incoder-1B	python	mdtraj-copyright	bio	code	en	copyright	incoder-1B
409	sasa	0	0.05	incoder/facebook/incoder-1B	python	mdtraj-copyright	md	code	en	copyright	incoder-1B
410	sasa	0	0.05	incoder/facebook/incoder-1B	python	mdtraj-copyright	bio	code	en	copyright	incoder-1B
411	sasa	0	0.05	incoder/facebook/incoder-1B	python	mdtraj-copyright	md	code	en	copyright	incoder-1B
412	sasa	0	0.05	incoder/facebook/incoder-1B	python	mdtraj-copyright	bio	code	en	copyright	incoder-1B
413	sasa	0	0.05	incoder/facebook/incoder-1B	python	mdtraj-copyright	md	code	en	copyright	incoder-1B
414	sasa	0	0.05	incoder/facebook/incoder-1B	python	mdtraj-copyright	bio	code	en	copyright	incoder-1B
415	scaffold	0	0.05	incoder/facebook/incoder-1B	python	rdkit-copyright	cheminf	code	ch	copyright	incoder-1B
416	scaffold	0	0.05	incoder/facebook/incoder-1B	python	rdkit-copyright	cheminf	code	ch	copyright	incoder-1B
417	scaffold	0	0.05	incoder/facebook/incoder-1B	python	rdkit-copyright	cheminf	code	ch	copyright	incoder-1B
418	scaffold	0	0.05	incoder/facebook/incoder-1B	python	rdkit-copyright	cheminf	code	ch	copyright	incoder-1B
419	scaffold	0	0.05	incoder/facebook/incoder-1B	python	rdkit-copyright	cheminf	code	ch	copyright	incoder-1B
420	seq-align	0	0.05	incoder/facebook/incoder-1B	python	biopython-copyright	bio	code	en	copyright	incoder-1B
421	seq-align	0	0.05	incoder/facebook/incoder-1B	python	biopython-copyright	bio	code	en	copyright	incoder-1B
422	seq-align	0	0.05	incoder/facebook/incoder-1B	python	biopython-copyright	bio	code	en	copyright	incoder-1B
423	seq-align	0	0.05	incoder/facebook/incoder-1B	python	biopython-copyright	bio	code	en	copyright	incoder-1B
424	seq-align	0	0.05	incoder/facebook/incoder-1B	python	biopython-copyright	bio	code	en	copyright	incoder-1B
425	seq-trans	0	0.05	incoder/facebook/incoder-1B	python	biopython-copyright	bio	code	en	copyright	incoder-1B
426	seq-trans	0	0.05	incoder/facebook/incoder-1B	python	biopython-copyright	bio	code	en	copyright	incoder-1B
427	seq-trans	0	0.05	incoder/facebook/incoder-1B	python	biopython-copyright	bio	code	en	copyright	incoder-1B
428	seq-trans	0	0.05	incoder/facebook/incoder-1B	python	biopython-copyright	bio	code	en	copyright	incoder-1B
429	seq-trans	0	0.05	incoder/facebook/incoder-1B	python	biopython-copyright	bio	code	en	copyright	incoder-1B
430	spectral_r	0	0.05	incoder/facebook/incoder-1B	python	numpy-copyright	stats	code	en	copyright	incoder-1B
431	spectral_r	0	0.05	incoder/facebook/incoder-1B	python	numpy-copyright	stats	code	en	copyright	incoder-1B
432	spectral_r	0	0.05	incoder/facebook/incoder-1B	python	numpy-copyright	stats	code	en	copyright	incoder-1B
433	spectral_r	0	0.05	incoder/facebook/incoder-1B	python	numpy-copyright	stats	code	en	copyright	incoder-1B
434	spectral_r	0	0.05	incoder/facebook/incoder-1B	python	numpy-copyright	stats	code	en	copyright	incoder-1B
435	find_peaks	0	0.05	incoder/facebook/incoder-1B	python	scipy-copyright	spectroscopy	code	en	copyright	incoder-1B
436	find_peaks	0	0.05	incoder/facebook/incoder-1B	python	scipy-copyright	spectroscopy	code	en	copyright	incoder-1B
437	find_peaks	0	0.05	incoder/facebook/incoder-1B	python	scipy-copyright	spectroscopy	code	en	copyright	incoder-1B
438	find_peaks	0	0.05	incoder/facebook/incoder-1B	python	scipy-copyright	spectroscopy	code	en	copyright	incoder-1B
439	find_peaks	0	0.05	incoder/facebook/incoder-1B	python	scipy-copyright	spectroscopy	code	en	copyright	incoder-1B
440	speed_of_sound	0	0.05	incoder/facebook/incoder-1B	python	python-copyright	thermo	code	en	copyright	incoder-1B
441	speed_of_sound	0	0.05	incoder/facebook/incoder-1B	python	python-copyright	thermo	code	en	copyright	incoder-1B
442	speed_of_sound	0	0.05	incoder/facebook/incoder-1B	python	python-copyright	thermo	code	en	copyright	incoder-1B
443	speed_of_sound	0	0.05	incoder/facebook/incoder-1B	python	python-copyright	thermo	code	en	copyright	incoder-1B
444	speed_of_sound	0	0.05	incoder/facebook/incoder-1B	python	python-copyright	thermo	code	en	copyright	incoder-1B
445	substructure	0	0.05	incoder/facebook/incoder-1B	python	rdkit-copyright	cheminf	code	ch	copyright	incoder-1B
446	substructure	0	0.05	incoder/facebook/incoder-1B	python	rdkit-copyright	cheminf	code	ch	copyright	incoder-1B
447	substructure	0	0.05	incoder/facebook/incoder-1B	python	rdkit-copyright	cheminf	code	ch	copyright	incoder-1B
448	substructure	0	0.05	incoder/facebook/incoder-1B	python	rdkit-copyright	cheminf	code	ch	copyright	incoder-1B
449	substructure	0	0.05	incoder/facebook/incoder-1B	python	rdkit-copyright	cheminf	code	ch	copyright	incoder-1B
450	tanimoto	0	0.05	incoder/facebook/incoder-1B	python	rdkit-copyright	cheminf	code	ch	copyright	incoder-1B
451	tanimoto	0	0.05	incoder/facebook/incoder-1B	python	rdkit-copyright	cheminf	code	ch	copyright	incoder-1B
452	tanimoto	0	0.05	incoder/facebook/incoder-1B	python	rdkit-copyright	cheminf	code	ch	copyright	incoder-1B
453	tanimoto	0	0.05	incoder/facebook/incoder-1B	python	rdkit-copyright	cheminf	code	ch	copyright	incoder-1B
454	tanimoto	0	0.05	incoder/facebook/incoder-1B	python	rdkit-copyright	cheminf	code	ch	copyright	incoder-1B
455	unbdistance	0	0.05	incoder/facebook/incoder-1B	python	mdtraj-copyright	md	code	en	copyright	incoder-1B
456	unbdistance	0	0.05	incoder/facebook/incoder-1B	python	mdtraj-copyright	md	code	en	copyright	incoder-1B
457	unbdistance	0	0.05	incoder/facebook/incoder-1B	python	mdtraj-copyright	md	code	en	copyright	incoder-1B
458	unbdistance	0	0.05	incoder/facebook/incoder-1B	python	mdtraj-copyright	md	code	en	copyright	incoder-1B
459	unbdistance	0	0.05	incoder/facebook/incoder-1B	python	mdtraj-copyright	md	code	en	copyright	incoder-1B
460	velocity_verlet_integration	0	0.05	incoder/facebook/incoder-1B	python	numpy-copyright	sim	code	en	copyright	incoder-1B
461	velocity_verlet_integration	0	0.05	incoder/facebook/incoder-1B	python	numpy-copyright	sim	code	en	copyright	incoder-1B
462	velocity_verlet_integration	0	0.05	incoder/facebook/incoder-1B	python	numpy-copyright	sim	code	en	copyright	incoder-1B
463	velocity_verlet_integration	0	0.05	incoder/facebook/incoder-1B	python	numpy-copyright	sim	code	en	copyright	incoder-1B
464	velocity_verlet_integration	0	0.05	incoder/facebook/incoder-1B	python	numpy-copyright	sim	code	en	copyright	incoder-1B
0	aa_polarity	0	0.05	incoder/facebook/incoder-1B	python	python-authority	bio	code	en	authority	incoder-1B
1	aa_polarity	0	0.05	incoder/facebook/incoder-1B	python	python-authority	bio	code	en	authority	incoder-1B
2	aa_polarity	0	0.05	incoder/facebook/incoder-1B	python	python-authority	bio	code	en	authority	incoder-1B
3	aa_polarity	0	0.05	incoder/facebook/incoder-1B	python	python-authority	bio	code	en	authority	incoder-1B
4	aa_polarity	0	0.05	incoder/facebook/incoder-1B	python	python-authority	bio	code	en	authority	incoder-1B
5	adiabatic_expansion	0	0.05	incoder/facebook/incoder-1B	python	python-authority	thermo	code	en	authority	incoder-1B
6	adiabatic_expansion	0	0.05	incoder/facebook/incoder-1B	python	python-authority	thermo	code	en	authority	incoder-1B
7	adiabatic_expansion	0	0.05	incoder/facebook/incoder-1B	python	python-authority	thermo	code	en	authority	incoder-1B
8	adiabatic_expansion	0	0.05	incoder/facebook/incoder-1B	python	python-authority	thermo	code	en	authority	incoder-1B
9	adiabatic_expansion	0	0.05	incoder/facebook/incoder-1B	python	python-authority	thermo	code	en	authority	incoder-1B
10	alignment	0	0.05	incoder/facebook/incoder-1B	python	mdtraj-authority	md	code	en	authority	incoder-1B
11	alignment	0	0.05	incoder/facebook/incoder-1B	python	mdtraj-authority	md	code	en	authority	incoder-1B
12	alignment	0	0.05	incoder/facebook/incoder-1B	python	mdtraj-authority	md	code	en	authority	incoder-1B
13	alignment	0	0.05	incoder/facebook/incoder-1B	python	mdtraj-authority	md	code	en	authority	incoder-1B
14	alignment	0	0.05	incoder/facebook/incoder-1B	python	mdtraj-authority	md	code	en	authority	incoder-1B
15	aromatic_aa	0	0.05	incoder/facebook/incoder-1B	python	python-authority	bio	code	en	authority	incoder-1B
16	aromatic_aa	0	0.05	incoder/facebook/incoder-1B	python	python-authority	bio	code	en	authority	incoder-1B
17	aromatic_aa	0	0.05	incoder/facebook/incoder-1B	python	python-authority	bio	code	en	authority	incoder-1B
18	aromatic_aa	0	0.05	incoder/facebook/incoder-1B	python	python-authority	bio	code	en	authority	incoder-1B
19	aromatic_aa	0	0.05	incoder/facebook/incoder-1B	python	python-authority	bio	code	en	authority	incoder-1B
20	arrhenius	0	0.05	incoder/facebook/incoder-1B	python	python-authority	genchem	code	ch	authority	incoder-1B
21	arrhenius	0	0.05	incoder/facebook/incoder-1B	python	python-authority	thermo	code	ch	authority	incoder-1B
22	arrhenius	0	0.05	incoder/facebook/incoder-1B	python	python-authority	genchem	code	ch	authority	incoder-1B
23	arrhenius	0	0.05	incoder/facebook/incoder-1B	python	python-authority	thermo	code	ch	authority	incoder-1B
24	arrhenius	0	0.05	incoder/facebook/incoder-1B	python	python-authority	genchem	code	ch	authority	incoder-1B
25	arrhenius	0	0.05	incoder/facebook/incoder-1B	python	python-authority	thermo	code	ch	authority	incoder-1B
26	arrhenius	0	0.05	incoder/facebook/incoder-1B	python	python-authority	genchem	code	ch	authority	incoder-1B
27	arrhenius	0	0.05	incoder/facebook/incoder-1B	python	python-authority	thermo	code	ch	authority	incoder-1B
28	arrhenius	0	0.05	incoder/facebook/incoder-1B	python	python-authority	genchem	code	ch	authority	incoder-1B
29	arrhenius	0	0.05	incoder/facebook/incoder-1B	python	python-authority	thermo	code	ch	authority	incoder-1B
30	bimolecular	1	0.05	incoder/facebook/incoder-1B	python	python-authority	genchem	code	ch	authority	incoder-1B
31	bimolecular	1	0.05	incoder/facebook/incoder-1B	python	python-authority	genchem	code	ch	authority	incoder-1B
32	bimolecular	1	0.05	incoder/facebook/incoder-1B	python	python-authority	genchem	code	ch	authority	incoder-1B
33	bimolecular	1	0.05	incoder/facebook/incoder-1B	python	python-authority	genchem	code	ch	authority	incoder-1B
34	bimolecular	1	0.05	incoder/facebook/incoder-1B	python	python-authority	genchem	code	ch	authority	incoder-1B
35	bb_rad	0	0.05	incoder/facebook/incoder-1B	python	numpy-authority	spectroscopy	code	en	authority	incoder-1B
36	bb_rad	0	0.05	incoder/facebook/incoder-1B	python	numpy-authority	spectroscopy	code	en	authority	incoder-1B
37	bb_rad	0	0.05	incoder/facebook/incoder-1B	python	numpy-authority	spectroscopy	code	en	authority	incoder-1B
38	bb_rad	0	0.05	incoder/facebook/incoder-1B	python	numpy-authority	spectroscopy	code	en	authority	incoder-1B
39	bb_rad	0	0.05	incoder/facebook/incoder-1B	python	numpy-authority	spectroscopy	code	en	authority	incoder-1B
40	blast	0	0.05	incoder/facebook/incoder-1B	python	requests-authority	bio	code	en	authority	incoder-1B
41	blast	0	0.05	incoder/facebook/incoder-1B	python	requests-authority	bio	code	en	authority	incoder-1B
42	blast	0	0.05	incoder/facebook/incoder-1B	python	requests-authority	bio	code	en	authority	incoder-1B
43	blast	0	0.05	incoder/facebook/incoder-1B	python	requests-authority	bio	code	en	authority	incoder-1B
44	blast	0	0.05	incoder/facebook/incoder-1B	python	requests-authority	bio	code	en	authority	incoder-1B
45	braggant	0	0.05	incoder/facebook/incoder-1B	python	numpy-authority	spectroscopy	code	en	authority	incoder-1B
46	braggant	0	0.05	incoder/facebook/incoder-1B	python	numpy-authority	spectroscopy	code	en	authority	incoder-1B
47	braggant	0	0.05	incoder/facebook/incoder-1B	python	numpy-authority	spectroscopy	code	en	authority	incoder-1B
48	braggant	0	0.05	incoder/facebook/incoder-1B	python	numpy-authority	spectroscopy	code	en	authority	incoder-1B
49	braggant	0	0.05	incoder/facebook/incoder-1B	python	numpy-authority	spectroscopy	code	en	authority	incoder-1B
50	bravais	0	0.05	incoder/facebook/incoder-1B	python	python-authority	spectroscopy	code	en	authority	incoder-1B
51	bravais	0	0.05	incoder/facebook/incoder-1B	python	python-authority	spectroscopy	code	en	authority	incoder-1B
52	bravais	0	0.05	incoder/facebook/incoder-1B	python	python-authority	spectroscopy	code	en	authority	incoder-1B
53	bravais	0	0.05	incoder/facebook/incoder-1B	python	python-authority	spectroscopy	code	en	authority	incoder-1B
54	bravais	0	0.05	incoder/facebook/incoder-1B	python	python-authority	spectroscopy	code	en	authority	incoder-1B
55	canonicalize	1	0.05	incoder/facebook/incoder-1B	python	rdkit-authority	cheminf	code	ch	authority	incoder-1B
56	canonicalize	1	0.05	incoder/facebook/incoder-1B	python	rdkit-authority	cheminf	code	ch	authority	incoder-1B
57	canonicalize	1	0.05	incoder/facebook/incoder-1B	python	rdkit-authority	cheminf	code	ch	authority	incoder-1B
58	canonicalize	1	0.05	incoder/facebook/incoder-1B	python	rdkit-authority	cheminf	code	ch	authority	incoder-1B
59	canonicalize	1	0.05	incoder/facebook/incoder-1B	python	rdkit-authority	cheminf	code	ch	authority	incoder-1B
60	carnot_efficiency	0	0.05	incoder/facebook/incoder-1B	python	python-authority	thermo	code	en	authority	incoder-1B
61	carnot_efficiency	0	0.05	incoder/facebook/incoder-1B	python	python-authority	thermo	code	en	authority	incoder-1B
62	carnot_efficiency	0	0.05	incoder/facebook/incoder-1B	python	python-authority	thermo	code	en	authority	incoder-1B
63	carnot_efficiency	0	0.05	incoder/facebook/incoder-1B	python	python-authority	thermo	code	en	authority	incoder-1B
64	carnot_efficiency	0	0.05	incoder/facebook/incoder-1B	python	python-authority	thermo	code	en	authority	incoder-1B
65	claussius	0	0.05	incoder/facebook/incoder-1B	python	python-authority	thermo	code	en	authority	incoder-1B
66	claussius	0	0.05	incoder/facebook/incoder-1B	python	python-authority	thermo	code	en	authority	incoder-1B
67	claussius	0	0.05	incoder/facebook/incoder-1B	python	python-authority	thermo	code	en	authority	incoder-1B
68	claussius	0	0.05	incoder/facebook/incoder-1B	python	python-authority	thermo	code	en	authority	incoder-1B
69	claussius	0	0.05	incoder/facebook/incoder-1B	python	python-authority	thermo	code	en	authority	incoder-1B
70	compare_electronegativity	0	0.05	incoder/facebook/incoder-1B	python	python-authority	genchem	code	ch	authority	incoder-1B
71	compare_electronegativity	0	0.05	incoder/facebook/incoder-1B	python	python-authority	genchem	code	ch	authority	incoder-1B
72	compare_electronegativity	0	0.05	incoder/facebook/incoder-1B	python	python-authority	genchem	code	ch	authority	incoder-1B
73	compare_electronegativity	0	0.05	incoder/facebook/incoder-1B	python	python-authority	genchem	code	ch	authority	incoder-1B
74	compare_electronegativity	0	0.05	incoder/facebook/incoder-1B	python	python-authority	genchem	code	ch	authority	incoder-1B
75	descriptors	0	0.05	incoder/facebook/incoder-1B	python	rdkit-authority	cheminf	code	ch	authority	incoder-1B
76	descriptors	0	0.05	incoder/facebook/incoder-1B	python	rdkit-authority	cheminf	code	ch	authority	incoder-1B
77	descriptors	0	0.05	incoder/facebook/incoder-1B	python	rdkit-authority	cheminf	code	ch	authority	incoder-1B
78	descriptors	0	0.05	incoder/facebook/incoder-1B	python	rdkit-authority	cheminf	code	ch	authority	incoder-1B
79	descriptors	0	0.05	incoder/facebook/incoder-1B	python	rdkit-authority	cheminf	code	ch	authority	incoder-1B
80	de_broglie	0	0.05	incoder/facebook/incoder-1B	python	python-authority	qm	code	ch	authority	incoder-1B
81	de_broglie	0	0.05	incoder/facebook/incoder-1B	python	python-authority	genchem	code	ch	authority	incoder-1B
82	de_broglie	0	0.05	incoder/facebook/incoder-1B	python	python-authority	qm	code	ch	authority	incoder-1B
83	de_broglie	0	0.05	incoder/facebook/incoder-1B	python	python-authority	genchem	code	ch	authority	incoder-1B
84	de_broglie	0	0.05	incoder/facebook/incoder-1B	python	python-authority	qm	code	ch	authority	incoder-1B
85	de_broglie	0	0.05	incoder/facebook/incoder-1B	python	python-authority	genchem	code	ch	authority	incoder-1B
86	de_broglie	0	0.05	incoder/facebook/incoder-1B	python	python-authority	qm	code	ch	authority	incoder-1B
87	de_broglie	0	0.05	incoder/facebook/incoder-1B	python	python-authority	genchem	code	ch	authority	incoder-1B
88	de_broglie	0	0.05	incoder/facebook/incoder-1B	python	python-authority	qm	code	ch	authority	incoder-1B
89	de_broglie	0	0.05	incoder/facebook/incoder-1B	python	python-authority	genchem	code	ch	authority	incoder-1B
90	dipole	0	0.05	incoder/facebook/incoder-1B	python	numpy-authority	genchem	code	ch	authority	incoder-1B
91	dipole	0	0.05	incoder/facebook/incoder-1B	python	numpy-authority	genchem	code	ch	authority	incoder-1B
92	dipole	0	0.05	incoder/facebook/incoder-1B	python	numpy-authority	genchem	code	ch	authority	incoder-1B
93	dipole	0	0.05	incoder/facebook/incoder-1B	python	numpy-authority	genchem	code	ch	authority	incoder-1B
94	dipole	0	0.05	incoder/facebook/incoder-1B	python	numpy-authority	genchem	code	ch	authority	incoder-1B
95	dou	0	0.05	incoder/facebook/incoder-1B	python	rdkit-authority	spectroscopy	code	en	authority	incoder-1B
96	dou	0	0.05	incoder/facebook/incoder-1B	python	rdkit-authority	spectroscopy	code	en	authority	incoder-1B
97	dou	0	0.05	incoder/facebook/incoder-1B	python	rdkit-authority	spectroscopy	code	en	authority	incoder-1B
98	dou	0	0.05	incoder/facebook/incoder-1B	python	rdkit-authority	spectroscopy	code	en	authority	incoder-1B
99	dou	0	0.05	incoder/facebook/incoder-1B	python	rdkit-authority	spectroscopy	code	en	authority	incoder-1B
100	element_mass	0	0.05	incoder/facebook/incoder-1B	python	python-authority	genchem	code	ch	authority	incoder-1B
101	element_mass	0	0.05	incoder/facebook/incoder-1B	python	python-authority	genchem	code	ch	authority	incoder-1B
102	element_mass	0	0.05	incoder/facebook/incoder-1B	python	python-authority	genchem	code	ch	authority	incoder-1B
103	element_mass	0	0.05	incoder/facebook/incoder-1B	python	python-authority	genchem	code	ch	authority	incoder-1B
104	element_mass	0	0.05	incoder/facebook/incoder-1B	python	python-authority	genchem	code	ch	authority	incoder-1B
105	element_name	0	0.05	incoder/facebook/incoder-1B	python	python-authority	genchem	code	ch	authority	incoder-1B
106	element_name	0	0.05	incoder/facebook/incoder-1B	python	python-authority	genchem	code	ch	authority	incoder-1B
107	element_name	0	0.05	incoder/facebook/incoder-1B	python	python-authority	genchem	code	ch	authority	incoder-1B
108	element_name	0	0.05	incoder/facebook/incoder-1B	python	python-authority	genchem	code	ch	authority	incoder-1B
109	element_name	0	0.05	incoder/facebook/incoder-1B	python	python-authority	genchem	code	ch	authority	incoder-1B
110	energy_of_e	0	0.05	incoder/facebook/incoder-1B	python	python-authority	qm	code	en	authority	incoder-1B
111	energy_of_e	0	0.05	incoder/facebook/incoder-1B	python	python-authority	qm	code	en	authority	incoder-1B
112	energy_of_e	0	0.05	incoder/facebook/incoder-1B	python	python-authority	qm	code	en	authority	incoder-1B
113	energy_of_e	0	0.05	incoder/facebook/incoder-1B	python	python-authority	qm	code	en	authority	incoder-1B
114	energy_of_e	0	0.05	incoder/facebook/incoder-1B	python	python-authority	qm	code	en	authority	incoder-1B
115	find_indices	0	0.05	incoder/facebook/incoder-1B	python	mdtraj-authority	md	code	en	authority	incoder-1B
116	find_indices	0	0.05	incoder/facebook/incoder-1B	python	mdtraj-authority	md	code	en	authority	incoder-1B
117	find_indices	0	0.05	incoder/facebook/incoder-1B	python	mdtraj-authority	md	code	en	authority	incoder-1B
118	find_indices	0	0.05	incoder/facebook/incoder-1B	python	mdtraj-authority	md	code	en	authority	incoder-1B
119	find_indices	0	0.05	incoder/facebook/incoder-1B	python	mdtraj-authority	md	code	en	authority	incoder-1B
120	force_constant	0	0.05	incoder/facebook/incoder-1B	python	numpy-authority	spectroscopy	code	en	authority	incoder-1B
121	force_constant	0	0.05	incoder/facebook/incoder-1B	python	numpy-authority	spectroscopy	code	en	authority	incoder-1B
122	force_constant	0	0.05	incoder/facebook/incoder-1B	python	numpy-authority	spectroscopy	code	en	authority	incoder-1B
123	force_constant	0	0.05	incoder/facebook/incoder-1B	python	numpy-authority	spectroscopy	code	en	authority	incoder-1B
124	force_constant	0	0.05	incoder/facebook/incoder-1B	python	numpy-authority	spectroscopy	code	en	authority	incoder-1B
125	freezing_depression	0	0.05	incoder/facebook/incoder-1B	python	python-authority	genchem	code	ch	authority	incoder-1B
126	freezing_depression	0	0.05	incoder/facebook/incoder-1B	python	python-authority	genchem	code	ch	authority	incoder-1B
127	freezing_depression	0	0.05	incoder/facebook/incoder-1B	python	python-authority	genchem	code	ch	authority	incoder-1B
128	freezing_depression	0	0.05	incoder/facebook/incoder-1B	python	python-authority	genchem	code	ch	authority	incoder-1B
129	freezing_depression	0	0.05	incoder/facebook/incoder-1B	python	python-authority	genchem	code	ch	authority	incoder-1B
130	gaussian_input_emin	1	0.05	incoder/facebook/incoder-1B	python	python-authority	qm	human	en	authority	incoder-1B
131	gaussian_input_emin	1	0.05	incoder/facebook/incoder-1B	python	python-authority	qm	human	en	authority	incoder-1B
132	gaussian_input_emin	1	0.05	incoder/facebook/incoder-1B	python	python-authority	qm	human	en	authority	incoder-1B
133	gaussian_input_emin	1	0.05	incoder/facebook/incoder-1B	python	python-authority	qm	human	en	authority	incoder-1B
134	gaussian_input_emin	1	0.05	incoder/facebook/incoder-1B	python	python-authority	qm	human	en	authority	incoder-1B
135	genpos	0	0.05	incoder/facebook/incoder-1B	python	requests-authority	spectroscopy	code	en	authority	incoder-1B
136	genpos	0	0.05	incoder/facebook/incoder-1B	python	requests-authority	spectroscopy	code	en	authority	incoder-1B
137	genpos	0	0.05	incoder/facebook/incoder-1B	python	requests-authority	spectroscopy	code	en	authority	incoder-1B
138	genpos	0	0.05	incoder/facebook/incoder-1B	python	requests-authority	spectroscopy	code	en	authority	incoder-1B
[truncated: 18,896 more rows]
