# Supplementary material for: Assessment of chemistry knowledge in large language models that generate code
Source: Royal Society of Chemistry journal article supplement (doi:10.1039/d2dd00087c), 2023-01-01
Supplement: d2dd00087c2.csv [file d2dd00087c2.csv]

Timestamp	Which example are you rating	Is this question	Is the solution	Extra comments
5/28/22 15:20	result_alignment_d24May2022_T0.2_r0	Medium	Perfect
5/28/22 15:21	result_alignment_d24May2022_T0.2_r1	Medium	Perfect
5/28/22 15:21	result_alignment_d24May2022_T0.2_r2	Medium	Perfect
5/28/22 15:22	result_gaussian_input_emin_d24May2022_T0.2_r0	Medium	Perfect
5/28/22 15:22	result_gaussian_input_emin_d24May2022_T0.2_r1	Medium	Perfect
5/28/22 15:23	result_gaussian_input_emin_d24May2022_T0.2_r0	Medium	Does not run but is almost correct
5/28/22 15:23	result_gaussian_input_emin_d24May2022_T0.2_r1	Medium	Does not run but is almost correct
5/28/22 15:24	result_gaussian_input_emin_d24May2022_T0.2_r2	Medium	Perfect
5/28/22 15:26	result_karplusant_d24May2022_T0.2_r0	Medium	Does not run but is almost correct
5/28/22 15:26	result_karplusant_d24May2022_T0.2_r1	Medium	Does not run but is almost correct
5/28/22 15:26	result_karplusant_d24May2022_T0.2_r2	Medium	Does not run but is almost correct
5/28/22 15:38	result_langevin_dynamics_d24May2022_T0.2_r0	Medium	Does not run but is almost correct
5/28/22 15:39	result_langevin_dynamics_d24May2022_T0.2_r1	Medium	Correct but not perfect
5/28/22 15:40	result_langevin_dynamics_d24May2022_T0.2_r2	Medium	Correct but not perfect
5/28/22 15:42	result_mc_harmonic_d24May2022_T0.2_r0	Medium	Runs and is almost correct
5/28/22 15:43	result_gaussian_input_emin_d24May2022_T0.2_r0	Easy	Runs and is almost correct
5/28/22 15:43	result_gaussian_input_emin_d24May2022_T0.2_r1	Easy	Runs and is almost correct
5/28/22 15:44	result_alignment_d24May2022_T0.2_r0	Easy	Perfect
5/28/22 15:44	result_alignment_d24May2022_T0.2_r1	Easy	Perfect
5/28/22 15:44	result_alignment_d24May2022_T0.2_r2	Easy	Perfect
5/28/22 15:45	result_karplusant_d24May2022_T0.2_r0	Easy	Runs and is almost correct
5/28/22 15:45	result_karplusant_d24May2022_T0.2_r1	Easy	Runs and is almost correct
5/28/22 15:45	result_karplusant_d24May2022_T0.2_r2	Easy	Runs and is almost correct
5/28/22 15:45	result_langevin_dynamics_d24May2022_T0.2_r0	Medium	Runs and is almost correct
5/28/22 15:46	result_mc_harmonic_d24May2022_T0.2_r1	Medium	Runs and is almost correct
5/28/22 15:47	result_mc_harmonic_d24May2022_T0.2_r2	Medium	Runs and is almost correct
5/28/22 15:49	result_mc_harmonic_d24May2022_T0.2_r1	Medium	Perfect
5/28/22 15:49	result_mc_harmonic_d24May2022_T0.2_r2	Medium	Correct but not perfect
5/28/22 15:59	result_mc_ising_d24May2022_T0.2_r0	Medium	Perfect
5/28/22 16:00	result_mc_ising_d24May2022_T0.2_r1	Medium	Correct but not perfect
5/28/22 16:00	result_mc_ising_d24May2022_T0.2_r2	Medium	Correct but not perfect
5/28/22 16:03	result_nwchem_input_emin_d24May2022_T0.2_r0	Easy	Runs and is almost correct
5/28/22 16:04	result_nwchem_input_emin_d24May2022_T0.2_r1	Easy	Runs and is almost correct
5/28/22 16:04	result_nwchem_input_emin_d24May2022_T0.2_r2	Easy	Runs and is almost correct
5/28/22 16:05	result_plot_3d_sin_d24May2022_T0.2_r0	Easy	Perfect
5/28/22 16:07	result_plot_3d_sin_d24May2022_T0.2_r2	Easy	Correct but not perfect
5/28/22 16:07	result_plot_3d_sin_d24May2022_T0.2_r1	Easy	Runs and is almost correct
5/28/22 16:08	result_plot_bar_d24May2022_T0.2_r0	Easy	Perfect
5/28/22 16:08	result_plot_bar_d24May2022_T0.2_r1	Easy	Perfect
5/28/22 16:08	result_plot_bar_d24May2022_T0.2_r2	Easy	Perfect
5/28/22 16:10	result_plot_contour_d24May2022_T0.2_r0	Easy	Runs and is almost correct
5/28/22 16:10	result_plot_contour_d24May2022_T0.2_r1	Easy	Runs and is almost correct
5/28/22 16:11	result_plot_contour_d24May2022_T0.2_r2	Easy	Correct but not perfect
5/28/22 16:13	result_plot_correlation_d24May2022_T0.2_r0	Medium	Runs and is almost correct
5/28/22 16:13	result_plot_correlation_d24May2022_T0.2_r1	Medium	Perfect
5/28/22 16:13	result_plot_correlation_d24May2022_T0.2_r2	Medium	Runs and is almost correct
5/28/22 16:14	result_plot_dual_axis_d24May2022_T0.2_r0	Easy	Runs and is almost correct
5/28/22 16:15	result_plot_dual_axis_d24May2022_T0.2_r1	Easy	Runs and is almost correct
5/28/22 16:15	result_plot_dual_axis_d24May2022_T0.2_r2	Easy	Perfect
5/28/22 16:26	result_plot_emoji_d24May2022_T0.2_r2	Medium	Does not run but is almost correct
5/28/22 16:26	result_plot_emoji_d24May2022_T0.2_r1	Medium	Does not run but is almost correct
5/28/22 16:27	result_plot_emoji_d24May2022_T0.2_r2	Medium	Does not run but is almost correct
5/28/22 16:27	result_plot_outside_legend_d24May2022_T0.2_r0	Medium	Perfect
5/28/22 16:28	result_plot_outside_legend_d24May2022_T0.2_r1	Medium	Perfect
5/28/22 16:28	result_plot_outside_legend_d24May2022_T0.2_r2	Medium	Runs and is almost correct
5/28/22 16:36	result_plot_pointsize_d24May2022_T0.2_r0	Medium	Does not run but is almost correct
5/28/22 16:36	result_plot_pointsize_d24May2022_T0.2_r1	Medium	Does not run but is almost correct
5/28/22 16:36	result_plot_pointsize_d24May2022_T0.2_r2	Medium	Does not run but is almost correct
5/28/22 16:37	result_plot_sin_d24May2022_T0.2_r0	Easy	Perfect
5/28/22 16:37	result_plot_sin_d24May2022_T0.2_r1	Easy	Perfect
5/28/22 16:37	result_plot_sin_d24May2022_T0.2_r2	Easy	Perfect
5/28/22 16:39	result_plot_sin_polar_d24May2022_T0.2_r0	Easy	Is far from correct
5/28/22 16:40	result_plot_sin_polar_d24May2022_T0.2_r1	Easy	Runs and is almost correct
5/28/22 16:40	result_plot_sin_polar_d24May2022_T0.2_r2	Easy	Perfect
5/28/22 16:41	result_protein-render_d24May2022_T0.2_r0	Medium	Is far from correct
5/28/22 16:41	result_protein-render_d24May2022_T0.2_r1	Medium	Is far from correct
5/28/22 16:41	result_protein-render_d24May2022_T0.2_r2	Medium	Is far from correct
5/28/22 16:56	result_pyscf_energy_d24May2022_T0.2_r0	Easy	Does not run but is almost correct
5/28/22 16:56	result_pyscf_energy_d24May2022_T0.2_r1	Easy	Does not run but is almost correct
5/28/22 16:57	result_pyscf_energy_d24May2022_T0.2_r2	Easy	Does not run but is almost correct
5/28/22 16:57	result_random_walk_d24May2022_T0.2_r0	Medium	Perfect
5/28/22 16:58	result_random_walk_d24May2022_T0.2_r1	Medium	Perfect
5/28/22 16:58	result_random_walk_d24May2022_T0.2_r2	Medium	Perfect
5/28/22 17:00	result_remove-water_d24May2022_T0.2_r0	Easy	Correct but not perfect
5/28/22 17:00	result_remove-water_d24May2022_T0.2_r1	Easy	Perfect
5/28/22 17:00	result_remove-water_d24May2022_T0.2_r2	Easy	Perfect
5/28/22 17:02	result_sasa_d24May2022_T0.2_r0	Easy	Runs and is almost correct
5/28/22 17:02	result_sasa_d24May2022_T0.2_r1	Easy	Perfect
5/28/22 17:02	result_sasa_d24May2022_T0.2_r2	Easy	Runs and is almost correct
5/28/22 17:04	result_velocity_verlet_integration_d24May2022_T0.2_r0	Easy	Correct but not perfect
5/28/22 17:05	result_velocity_verlet_integration_d24May2022_T0.2_r1	Easy	Correct but not perfect
5/28/22 17:06	result_velocity_verlet_integration_d24May2022_T0.2_r2	Easy	Perfect
5/29/22 14:43	result_alignment_d24May2022_T0.2_r0	Easy	Perfect
5/29/22 14:45	result_alignment_d24May2022_T0.2_r1	Easy	Perfect
5/29/22 14:46	result_alignment_d24May2022_T0.2_r2	Easy	Perfect
5/29/22 14:48	result_gaussian_input_emin_d24May2022_T0.2_r0	Easy	Perfect
5/29/22 14:49	result_gaussian_input_emin_d24May2022_T0.2_r1	Easy	Perfect
5/29/22 14:50	result_gaussian_input_emin_d24May2022_T0.2_r2	Easy	Perfect
5/29/22 14:59	result_karplusant_d24May2022_T0.2_r0	Easy	Is far from correct	Tested for Ethane https://en.wikipedia.org/wiki/Karplus_equation
5/29/22 15:00	result_karplusant_d24May2022_T0.2_r1	Easy	Perfect	Tested for Ethane https://en.wikipedia.org/wiki/Karplus_equation
5/29/22 15:01	result_karplusant_d24May2022_T0.2_r2	Easy	Perfect	Tested for Ethane https://en.wikipedia.org/wiki/Karplus_equation
5/29/22 15:17	result_langevin_dynamics_d24May2022_T0.2_r0	Medium	Perfect	Tested on a harmonic potential with spring constant 1
5/29/22 15:17	result_langevin_dynamics_d24May2022_T0.2_r1	Medium	Perfect	Tested on a harmonic potential with spring constant 1
5/29/22 15:18	result_langevin_dynamics_d24May2022_T0.2_r2	Medium	Perfect	Tested on a harmonic potential with spring constant 1
5/29/22 15:22	result_mc_harmonic_d24May2022_T0.2_r0	Easy	Perfect
5/29/22 15:22	result_mc_harmonic_d24May2022_T0.2_r1	Easy	Perfect
5/29/22 15:23	result_mc_harmonic_d24May2022_T0.2_r2	Easy	Perfect
5/29/22 15:24	result_mc_harmonic_d24May2022_T0.2_r2	Easy	Perfect
5/29/22 15:28	result_mc_ising_d24May2022_T0.2_r0	Medium	Perfect
5/29/22 15:28	result_mc_ising_d24May2022_T0.2_r1	Medium	Perfect
5/29/22 15:28	result_mc_ising_d24May2022_T0.2_r2	Medium	Perfect
5/29/22 15:31	result_nwchem_input_emin_d24May2022_T0.2_r0	Easy	Perfect
5/29/22 15:31	result_nwchem_input_emin_d24May2022_T0.2_r1	Easy	Perfect
5/29/22 15:31	result_nwchem_input_emin_d24May2022_T0.2_r2	Easy	Perfect
5/29/22 15:42	result_plot_3d_sin_d24May2022_T0.2_r0	Easy	Correct but not perfect	Worked after adding: import mpl_toolkits.mplot3d.axes3d
5/29/22 15:42	result_plot_3d_sin_d24May2022_T0.2_r1	Easy	Correct but not perfect	Worked after adding: import mpl_toolkits.mplot3d.axes3d
5/29/22 15:42	result_plot_3d_sin_d24May2022_T0.2_r2	Easy	Correct but not perfect	Worked after adding: import mpl_toolkits.mplot3d.axes3d
5/29/22 15:41	result_plot_bar_d24May2022_T0.2_r0	Easy	Correct but not perfect	Had to add: fig = plt.figure()
5/29/22 15:44	result_plot_bar_d24May2022_T0.2_r1	Easy	Correct but not perfect	Had to add: fig = plt.figure()
5/29/22 15:45	result_plot_bar_d24May2022_T0.2_r2	Easy	Correct but not perfect	Had to add: fig = plt.figure()
5/29/22 16:07	result_plot_contour_d24May2022_T0.2_r0	Easy	Correct but not perfect	had to include: plt.figure()
5/29/22 16:07	result_plot_contour_d24May2022_T0.2_r1	Easy	Correct but not perfect	had to include: plt.figure()
5/29/22 16:08	result_plot_contour_d24May2022_T0.2_r2	Easy	Correct but not perfect	had to include: plt.figure()
5/29/22 16:11	result_plot_correlation_d24May2022_T0.2_r0	Easy	Perfect
5/29/22 16:11	result_plot_correlation_d24May2022_T0.2_r1	Easy	Perfect
5/29/22 16:11	result_plot_correlation_d24May2022_T0.2_r2	Easy	Correct but not perfect	Got r^2=0.47
5/29/22 16:14	result_plot_dual_axis_d24May2022_T0.2_r0	Medium	Runs and is almost correct	Plots both functions but not the 2nd y axis
5/29/22 16:15	result_plot_dual_axis_d24May2022_T0.2_r1	Medium	Runs and is almost correct	Plots both y axes but only plots one of the functions
5/29/22 16:16	result_plot_dual_axis_d24May2022_T0.2_r2	Medium	Perfect
5/29/22 16:19	result_plot_emoji_d24May2022_T0.2_r0	Medium	Is far from correct
5/29/22 16:19	result_plot_emoji_d24May2022_T0.2_r1	Medium	Is far from correct
5/29/22 16:20	result_plot_emoji_d24May2022_T0.2_r2	Medium	Is far from correct
5/29/22 16:21	result_plot_outside_legend_d24May2022_T0.2_r0	Easy	Perfect
5/29/22 16:22	result_plot_outside_legend_d24May2022_T0.2_r1	Medium	Perfect
5/29/22 16:23	result_plot_outside_legend_d24May2022_T0.2_r2	Easy	Perfect
5/29/22 16:31	result_plot_pointsize_d24May2022_T0.2_r0	Medium	Correct but not perfect	Works after removing the "orientation" property
5/29/22 16:32	result_plot_pointsize_d24May2022_T0.2_r1	Medium	Correct but not perfect	Works after removing the "aspect" property
5/29/22 16:32	result_plot_pointsize_d24May2022_T0.2_r2	Medium	Correct but not perfect	Works after removing the "aspect" property
5/29/22 16:33	result_plot_sin_d24May2022_T0.2_r0	Easy	Perfect
5/29/22 16:35	result_plot_sin_d24May2022_T0.2_r2	Easy	Perfect
5/29/22 16:37	result_plot_sin_polar_d24May2022_T0.2_r0	Medium	Perfect
5/29/22 16:39	result_plot_sin_polar_d24May2022_T0.2_r1	Medium	Perfect
5/29/22 16:40	result_plot_sin_polar_d24May2022_T0.2_r2	Medium	Perfect
5/29/22 16:47	result_protein-render_d24May2022_T0.2_r0	Medium	Does not run but is almost correct	Error: "'NGLWidget' object has no attribute 'png'"
5/29/22 16:48	result_protein-render_d24May2022_T0.2_r1	Medium	Runs and is almost correct	No output produced
5/29/22 16:48	result_protein-render_d24May2022_T0.2_r2	Medium	Runs and is almost correct	No output produced
5/29/22 16:52	result_pyscf_energy_d24May2022_T0.2_r0	Easy	Perfect	Tested for: atom='H 0 0 0; H 0 0 1.2', basis='ccpvdz'
5/29/22 16:53	result_pyscf_energy_d24May2022_T0.2_r1	Easy	Perfect	Tested for: atom='H 0 0 0; H 0 0 1.2', basis='ccpvdz'
5/29/22 16:53	result_pyscf_energy_d24May2022_T0.2_r2	Easy	Perfect	Tested for: atom='H 0 0 0; H 0 0 1.2', basis='ccpvdz'
5/29/22 16:56	result_random_walk_d24May2022_T0.2_r0	Easy	Perfect
5/29/22 16:57	result_random_walk_d24May2022_T0.2_r1	Easy	Perfect
5/29/22 16:57	result_random_walk_d24May2022_T0.2_r2	Easy	Perfect
5/29/22 17:00	result_remove-water_d24May2022_T0.2_r0	Medium	Perfect	Double checked using VMD
5/29/22 17:01	result_remove-water_d24May2022_T0.2_r1	Medium	Perfect	Double checked with VMD
5/29/22 17:01	result_remove-water_d24May2022_T0.2_r2	Medium	Perfect	Double checked with VMD
5/29/22 17:04	result_sasa_d24May2022_T0.2_r0	Easy	Perfect
5/29/22 17:04	result_sasa_d24May2022_T0.2_r1	Easy	Runs and is almost correct
5/29/22 17:04	result_sasa_d24May2022_T0.2_r2	Easy	Perfect
5/29/22 17:12	result_velocity_verlet_integration_d24May2022_T0.2_r0	Easy	Perfect
5/29/22 17:12	result_velocity_verlet_integration_d24May2022_T0.2_r0	Easy	Perfect
5/29/22 17:13	result_velocity_verlet_integration_d24May2022_T0.2_r2	Easy	Perfect
5/29/22 18:16	result_alignment_d24May2022_T0.2_r0	Easy	Perfect
5/30/22 0:09	result_alignment_d24May2022_T0.2_r0	Easy	Perfect
5/30/22 0:11	result_alignment_d24May2022_T0.2_r1	Easy	Perfect
5/30/22 0:11	result_alignment_d24May2022_T0.2_r0	Easy	Perfect
5/30/22 0:12	result_alignment_d24May2022_T0.2_r2	Easy	Perfect
5/30/22 0:14	result_gaussian_input_emin_d24May2022_T0.2_r0	Medium	Is far from correct	I don't understand the code
5/30/22 0:15	result_gaussian_input_emin_d24May2022_T0.2_r1	Medium	Is far from correct	Indent error
5/30/22 0:16	result_gaussian_input_emin_d24May2022_T0.2_r2	Medium	Is far from correct
5/30/22 0:20	result_karplusant_d24May2022_T0.2_r0	Medium	Is far from correct	Wrong Eq
5/30/22 0:21	result_karplusant_d24May2022_T0.2_r1	Medium	Is far from correct	wrong eq
5/30/22 0:22	result_karplusant_d24May2022_T0.2_r2	Medium	Is far from correct	wrong eq
5/30/22 1:11	result_langevin_dynamics_d24May2022_T0.2_r0	Hard	Does not run but is almost correct	F(x_traj[i]) causes error TypeError: 'int' object is not callable
5/30/22 1:12	result_langevin_dynamics_d24May2022_T0.2_r1	Hard	Is far from correct	F(x_traj[i]) causes error: TypeError: 'int' object is not callable
5/30/22 1:14	result_langevin_dynamics_d24May2022_T0.2_r2	Hard	Is far from correct	F(x_traj[i]) causes error: TypeError: 'int' object is not callable
5/30/22 1:17	result_mc_harmonic_d24May2022_T0.2_r0	Hard	Correct but not perfect	harmonic constant not defined in eq
5/30/22 1:22	result_mc_harmonic_d24May2022_T0.2_r0	Hard	Runs and is almost correct	the new x in the algorithm is independent from previous step
5/30/22 1:23	result_mc_harmonic_d24May2022_T0.2_r1	Hard	Correct but not perfect
5/30/22 1:25	result_mc_harmonic_d24May2022_T0.2_r2	Hard	Runs and is almost correct	The new x is completely independent of the previous step
5/30/22 1:37	result_mc_ising_d24May2022_T0.2_r0	Hard	Perfect
5/30/22 1:38	result_mc_ising_d24May2022_T0.2_r1	Hard	Perfect
5/30/22 1:39	result_mc_ising_d24May2022_T0.2_r2	Hard	Perfect
5/30/22 11:33	result_nwchem_input_emin_d24May2022_T0.2_r0	Medium	Perfect
5/30/22 11:34	result_nwchem_input_emin_d24May2022_T0.2_r2	Medium	Perfect
5/30/22 11:34	result_nwchem_input_emin_d24May2022_T0.2_r2	Medium	Perfect
5/30/22 11:37	result_plot_3d_sin_d24May2022_T0.2_r2	Medium	Runs and is almost correct
5/30/22 11:37	result_plot_3d_sin_d24May2022_T0.2_r1	Medium	Runs and is almost correct
5/30/22 11:38	result_plot_3d_sin_d24May2022_T0.2_r0	Medium	Is far from correct
5/30/22 11:42	result_plot_bar_d24May2022_T0.2_r2	Easy	Correct but not perfect	y label missing "worked'
5/30/22 11:43	result_plot_bar_d24May2022_T0.2_r1	Easy	Perfect
5/30/22 11:43	result_plot_bar_d24May2022_T0.2_r0	Easy	Perfect
5/30/22 11:45	result_plot_bar_d24May2022_T0.2_r0	Easy	Perfect
5/30/22 11:47	result_plot_contour_d24May2022_T0.2_r0	Medium	Perfect
5/30/22 11:47	result_plot_contour_d24May2022_T0.2_r1	Medium	Perfect
5/30/22 11:47	result_plot_contour_d24May2022_T0.2_r2	Medium	Perfect
5/30/22 11:52	result_plot_correlation_d24May2022_T0.2_r0	Medium	Correct but not perfect	Y and X are not weakly correlated
5/30/22 11:53	result_plot_correlation_d24May2022_T0.2_r1	Medium	Runs and is almost correct	Y and X are not weakly correlated
5/30/22 11:55	result_plot_correlation_d24May2022_T0.2_r2	Medium	Runs and is almost correct	Y and X are not weakly correlated, legend not on top left
5/30/22 11:58	result_plot_dual_axis_d24May2022_T0.2_r0	Medium	Is far from correct
5/30/22 12:00	result_plot_dual_axis_d24May2022_T0.2_r1	Medium	Does not run but is almost correct
5/30/22 12:08	result_plot_dual_axis_d24May2022_T0.2_r2	Medium	Does not run but is almost correct
5/30/22 12:11	result_plot_emoji_d24May2022_T0.2_r2	Medium	Does not run but is almost correct	ValueError: Unrecognized marker style '😀'
5/30/22 12:12	result_plot_emoji_d24May2022_T0.2_r1	Medium	Does not run but is almost correct	ValueError: Unrecognized marker style '😀'
5/30/22 12:12	result_plot_emoji_d24May2022_T0.2_r0	Medium	Does not run but is almost correct	ValueError: Unrecognized marker style '😀'
5/30/22 12:15	result_plot_outside_legend_d24May2022_T0.2_r2	Medium	Correct but not perfect	Legend not outside
5/30/22 12:15	result_plot_outside_legend_d24May2022_T0.2_r1	Medium	Perfect
5/30/22 12:16	result_plot_outside_legend_d24May2022_T0.2_r0	Medium	Perfect
5/30/22 12:20	result_plot_pointsize_d24May2022_T0.2_r2	Medium	Does not run but is almost correct
5/30/22 12:21	result_plot_pointsize_d24May2022_T0.2_r1	Medium	Does not run but is almost correct
5/30/22 12:21	result_plot_pointsize_d24May2022_T0.2_r0	Medium	Does not run but is almost correct
5/30/22 12:22	result_plot_sin_d24May2022_T0.2_r2	Easy	Perfect
5/30/22 12:22	result_plot_sin_d24May2022_T0.2_r1	Easy	Perfect
5/30/22 12:22	result_plot_sin_d24May2022_T0.2_r0	Easy	Perfect
5/30/22 12:24	result_plot_sin_polar_d24May2022_T0.2_r0	Medium	Runs and is almost correct	too many irrelevant outputs
5/30/22 12:25	result_plot_sin_polar_d24May2022_T0.2_r1	Medium	Correct but not perfect	one extra output
5/30/22 12:26	result_plot_sin_polar_d24May2022_T0.2_r1	Medium	Correct but not perfect	one extra output
5/30/22 12:26	result_plot_sin_polar_d24May2022_T0.2_r2	Medium	Perfect
5/30/22 12:31	result_protein-render_d24May2022_T0.2_r0	Medium	Does not run but is almost correct	too many outputs
5/30/22 12:33	result_protein-render_d24May2022_T0.2_r1	Medium	Does not run but is almost correct
5/30/22 12:33	result_protein-render_d24May2022_T0.2_r2	Medium	Does not run but is almost correct
5/30/22 12:44	result_pyscf_energy_d24May2022_T0.2_r0	Hard	Perfect
5/30/22 12:44	result_pyscf_energy_d24May2022_T0.2_r1	Hard	Perfect
5/30/22 12:44	result_pyscf_energy_d24May2022_T0.2_r2	Hard	Perfect
5/30/22 12:46	result_random_walk_d24May2022_T0.2_r0	Medium	Perfect
5/30/22 12:47	result_random_walk_d24May2022_T0.2_r1	Easy	Perfect
5/30/22 12:47	result_random_walk_d24May2022_T0.2_r2	Easy	Perfect
5/30/22 12:49	result_remove-water_d24May2022_T0.2_r0	Medium	Correct but not perfect
5/30/22 12:49	result_remove-water_d24May2022_T0.2_r1	Medium	Perfect
5/30/22 12:49	result_remove-water_d24May2022_T0.2_r2	Medium	Perfect
5/30/22 12:50	result_sasa_d24May2022_T0.2_r0	Medium	Perfect
5/30/22 12:50	result_sasa_d24May2022_T0.2_r1	Medium	Perfect
5/30/22 12:51	result_sasa_d24May2022_T0.2_r2	Medium	Perfect
5/30/22 12:54	result_velocity_verlet_integration_d24May2022_T0.2_r0	Hard	Does not run but is almost correct	F(x_traj[i]) needs * before ()
5/30/22 12:54	result_velocity_verlet_integration_d24May2022_T0.2_r1	Hard	Does not run but is almost correct	F(x_traj[i]) needs * before ()
5/30/22 12:55	result_velocity_verlet_integration_d24May2022_T0.2_r2	Hard	Does not run but is almost correct	F(x_traj[i]) needs * before ()
5/30/22 14:18	null	Easy	Perfect
5/30/22 14:33	result_alignment_d24May2022_T0.2_r0	Easy	Perfect
5/30/22 14:34	result_alignment_d24May2022_T0.2_r1	Easy	Perfect
5/30/22 14:34	result_alignment_d24May2022_T0.2_r2	Easy	Perfect	Same response in all 3
5/30/22 14:37	result_gaussian_input_emin_d24May2022_T0.2_r0	Hard	Perfect
5/30/22 14:46	result_gaussian_input_emin_d24May2022_T0.2_r1	Hard	Perfect
5/30/22 14:46	result_gaussian_input_emin_d24May2022_T0.2_r0	Hard	Correct but not perfect	Needs a blank line at the end of the file
5/30/22 14:51	result_gaussian_input_emin_d24May2022_T0.2_r2	Hard	Correct but not perfect	Needs a blank line at the end of the input script if not mistaken
5/30/22 14:54	result_karplusant_d24May2022_T0.2_r0	Easy	Runs and is almost correct	last term is a constant (C)
5/30/22 14:55	result_karplusant_d24May2022_T0.2_r1	Easy	Runs and is almost correct	wrong equation
5/30/22 14:55	result_karplusant_d24May2022_T0.2_r2	Easy	Runs and is almost correct	wrong eqaution
5/30/22 15:02	result_langevin_dynamics_d24May2022_T0.2_r0	Medium	Runs and is almost correct	wrong eq
5/30/22 15:04	result_langevin_dynamics_d24May2022_T0.2_r1	Medium	Runs and is almost correct	wrong eq
5/30/22 15:06	result_langevin_dynamics_d24May2022_T0.2_r2	Medium	Runs and is almost correct	wrong eq
5/30/22 15:08	result_mc_harmonic_d24May2022_T0.2_r0	Hard	Perfect
5/30/22 15:13	result_mc_harmonic_d24May2022_T0.2_r1	Hard	Runs and is almost correct
5/30/22 15:25	result_mc_harmonic_d24May2022_T0.2_r2	Hard	Correct but not perfect	`Accept xnew if deltaE < 0` missing
5/30/22 15:26	result_plot_3d_sin_d24May2022_T0.2_r0	Medium	Perfect
5/30/22 15:26	result_plot_3d_sin_d24May2022_T0.2_r1	Medium	Perfect
5/30/22 15:27	result_plot_3d_sin_d24May2022_T0.2_r2	Medium	Perfect
5/30/22 15:28	result_plot_bar_d24May2022_T0.2_r0	Medium	Perfect
5/30/22 15:29	result_plot_bar_d24May2022_T0.2_r1	Medium	Perfect
5/30/22 15:30	result_plot_bar_d24May2022_T0.2_r2	Medium	Perfect
5/30/22 15:31	result_plot_contour_d24May2022_T0.2_r0	Medium	Correct but not perfect
5/30/22 15:33	result_plot_contour_d24May2022_T0.2_r1	Medium	Correct but not perfect
5/30/22 15:35	result_plot_contour_d24May2022_T0.2_r2	Medium	Correct but not perfect
5/30/22 15:36	result_plot_correlation_d24May2022_T0.2_r0	Hard	Correct but not perfect
5/30/22 15:37	result_plot_correlation_d24May2022_T0.2_r1	Hard	Runs and is almost correct
5/30/22 15:40	result_plot_dual_axis_d24May2022_T0.2_r0	Hard	Correct but not perfect
5/30/22 15:41	result_plot_dual_axis_d24May2022_T0.2_r1	Hard	Is far from correct	y=x not plotted.
5/30/22 15:41	result_plot_dual_axis_d24May2022_T0.2_r2	Hard	Perfect
5/30/22 15:46	result_plot_emoji_d24May2022_T0.2_r0	Medium	Is far from correct
5/30/22 15:52	result_plot_emoji_d24May2022_T0.2_r1	Hard	Is far from correct
5/30/22 15:53	result_plot_emoji_d24May2022_T0.2_r2	Hard	Is far from correct
5/30/22 15:54	result_plot_outside_legend_d24May2022_T0.2_r0	Medium	Perfect
5/30/22 15:54	result_plot_outside_legend_d24May2022_T0.2_r1	Medium	Perfect
5/30/22 15:55	result_plot_outside_legend_d24May2022_T0.2_r2	Medium	Runs and is almost correct
5/30/22 15:56	result_plot_pointsize_d24May2022_T0.2_r0	Hard	Is far from correct
5/30/22 15:56	result_plot_pointsize_d24May2022_T0.2_r1	Hard	Is far from correct
5/30/22 15:56	result_plot_pointsize_d24May2022_T0.2_r2	Hard	Is far from correct
5/30/22 15:57	result_plot_sin_d24May2022_T0.2_r0	Easy	Perfect
5/30/22 15:58	result_plot_sin_d24May2022_T0.2_r1	Easy	Perfect
5/30/22 15:58	result_plot_sin_d24May2022_T0.2_r2	Easy	Perfect
5/30/22 16:00	result_plot_sin_polar_d24May2022_T0.2_r0	Easy	Runs and is almost correct	multiple plots?
5/30/22 16:01	result_plot_sin_polar_d24May2022_T0.2_r1	Easy	Runs and is almost correct	Plots sin(x) curve as well. Not sure why
5/30/22 16:01	result_plot_sin_polar_d24May2022_T0.2_r2	Easy	Perfect
5/30/22 16:04	result_remove-water_d24May2022_T0.2_r1	Medium	Perfect
5/30/22 16:05	result_remove-water_d24May2022_T0.2_r1	Medium	Correct but not perfect
5/30/22 16:06	result_remove-water_d24May2022_T0.2_r0	Medium	Correct but not perfect
5/30/22 16:08	result_protein-render_d24May2022_T0.2_r2	Hard	Runs and is almost correct
5/30/22 16:09	result_protein-render_d24May2022_T0.2_r1	Hard	Does not run but is almost correct
5/30/22 16:09	result_protein-render_d24May2022_T0.2_r0	Hard	Is far from correct
5/30/22 16:12	result_nwchem_input_emin_d24May2022_T0.2_r0	Hard	Does not run but is almost correct
5/30/22 16:13	result_nwchem_input_emin_d24May2022_T0.2_r2	Hard	Correct but not perfect
5/30/22 16:13	result_nwchem_input_emin_d24May2022_T0.2_r1	Hard	Does not run but is almost correct
5/30/22 16:21	result_velocity_verlet_integration_d24May2022_T0.2_r2	Hard	Perfect
5/30/22 16:23	result_velocity_verlet_integration_d24May2022_T0.2_r1	Hard	Perfect
5/30/22 16:23	result_velocity_verlet_integration_d24May2022_T0.2_r0	Hard	Perfect
5/30/22 16:26	result_sasa_d24May2022_T0.2_r0	Easy	Correct but not perfect
5/30/22 16:26	result_sasa_d24May2022_T0.2_r2	Medium	Correct but not perfect
5/30/22 16:27	result_sasa_d24May2022_T0.2_r1	Medium	Perfect
5/30/22 16:27	result_sasa_d24May2022_T0.2_r2	Medium	Runs and is almost correct
5/30/22 16:32	result_random_walk_d24May2022_T0.2_r0	Hard	Perfect
5/30/22 16:32	result_random_walk_d24May2022_T0.2_r1	Hard	Runs and is almost correct
5/30/22 16:33	result_random_walk_d24May2022_T0.2_r2	Hard	Runs and is almost correct
5/30/22 20:30	result_mc_harmonic_d24May2022_T0.2_r0	Medium	Correct but not perfect	denominator 2 is missing, rest is fine.
5/30/22 20:31	result_mc_harmonic_d24May2022_T0.2_r1	Medium	Perfect
5/30/22 20:51	result_mc_harmonic_d24May2022_T0.2_r2	Medium	Correct but not perfect	denominator 2 is missing.
5/30/22 20:33	result_mc_ising_d24May2022_T0.2_r0	Hard	Perfect
5/30/22 20:36	result_mc_ising_d24May2022_T0.2_r1	Hard	Perfect	just an extra dE <= 0 statement used.
5/30/22 20:54	result_mc_ising_d24May2022_T0.2_r2	Hard	Perfect
5/30/22 20:41	result_plot_3d_sin_d24May2022_T0.2_r0	Easy	Is far from correct	wrong, z = sin(x) x sin(y) used
5/30/22 20:43	result_plot_3d_sin_d24May2022_T0.2_r1	Easy	Is far from correct	wrong function, z= sin(x) + cos(y) used.
5/30/22 20:44	result_plot_3d_sin_d24May2022_T0.2_r2	Easy	Is far from correct	wrong function used, z= sin(x) + cos(y)
5/30/22 20:45	result_plot_bar_d24May2022_T0.2_r0	Easy	Perfect
5/30/22 20:46	result_plot_bar_d24May2022_T0.2_r1	Easy	Perfect
5/30/22 20:47	result_plot_bar_d24May2022_T0.2_r2	Easy	Perfect
5/30/22 20:57	result_plot_contour_d24May2022_T0.2_r0	Easy	Correct but not perfect	colorbar not okay
5/30/22 20:58	result_plot_contour_d24May2022_T0.2_r1	Easy	Correct but not perfect	colorbar not okay
5/30/22 21:02	result_plot_contour_d24May2022_T0.2_r2	Easy	Correct but not perfect	contour lines are not visible, colorbar not okay.
5/30/22 21:04	result_plot_correlation_d24May2022_T0.2_r0	Easy	Perfect
5/30/22 21:05	result_plot_correlation_d24May2022_T0.2_r1	Easy	Perfect
5/30/22 21:07	result_plot_correlation_d24May2022_T0.2_r2	Easy	Correct but not perfect	text box is not placed at top left, overlapping with the data points.
5/30/22 21:13	result_plot_emoji_d24May2022_T0.2_r0	Easy	Runs and is almost correct	error: Unrecognized marker style '😀'
5/30/22 21:14	result_plot_emoji_d24May2022_T0.2_r1	Easy	Runs and is almost correct	error: Unrecognized marker style '😀'
5/30/22 21:15	result_plot_emoji_d24May2022_T0.2_r2	Easy	Runs and is almost correct	error: Unrecognized marker style '😀'
5/31/22 0:40	result_plot_dual_axis_d24May2022_T0.2_r0	Easy	Is far from correct	made both plots on same y axis.
5/31/22 0:42	result_plot_dual_axis_d24May2022_T0.2_r1	Easy	Runs and is almost correct	It used two y axis but did plot sin(x) on both
5/31/22 0:43	result_plot_dual_axis_d24May2022_T0.2_r2	Easy	Perfect
5/31/22 0:45	result_plot_sin_d24May2022_T0.2_r0	Easy	Perfect
5/31/22 0:45	result_plot_sin_d24May2022_T0.2_r1	Easy	Perfect
5/31/22 0:46	result_plot_sin_d24May2022_T0.2_r2	Easy	Perfect
5/31/22 0:49	result_alignment_d24May2022_T0.2_r0	Easy	Perfect
5/31/22 0:49	result_alignment_d24May2022_T0.2_r1	Easy	Perfect
5/31/22 0:50	result_alignment_d24May2022_T0.2_r2	Easy	Perfect
5/31/22 0:55	result_karplusant_d24May2022_T0.2_r0	Medium	Is far from correct	wrong formula used here.
5/31/22 0:57	result_karplusant_d24May2022_T0.2_r1	Medium	Is far from correct	wrong formula used.
5/31/22 0:58	result_karplusant_d24May2022_T0.2_r2	Medium	Is far from correct	wrong formula
5/31/22 1:12	result_plot_outside_legend_d24May2022_T0.2_r2	Easy	Correct but not perfect	legend is inside the plot
5/31/22 1:12	result_plot_outside_legend_d24May2022_T0.2_r0	Easy	Perfect
5/31/22 1:13	result_plot_outside_legend_d24May2022_T0.2_r1	Easy	Perfect
5/31/22 1:25	result_plot_pointsize_d24May2022_T0.2_r0	Hard	Runs and is almost correct	aspect not okay and orientation is used at wrong place.
5/31/22 1:26	result_plot_pointsize_d24May2022_T0.2_r1	Hard	Correct but not perfect	aspect not okay
5/31/22 1:26	result_plot_pointsize_d24May2022_T0.2_r2	Hard	Correct but not perfect
5/31/22 1:36	result_velocity_verlet_integration_d24May2022_T0.2_r0	Hard	Perfect
5/31/22 1:36	result_velocity_verlet_integration_d24May2022_T0.2_r1	Hard	Perfect
5/31/22 1:37	result_velocity_verlet_integration_d24May2022_T0.2_r2	Hard	Perfect
5/31/22 1:39	result_sasa_d24May2022_T0.2_r0	Easy	Perfect
5/31/22 1:40	result_sasa_d24May2022_T0.2_r1	Easy	Perfect
5/31/22 1:40	result_sasa_d24May2022_T0.2_r2	Easy	Perfect
5/31/22 2:08	result_remove-water_d24May2022_T0.2_r0	Medium	Perfect
5/31/22 2:08	result_remove-water_d24May2022_T0.2_r1	Medium	Perfect
5/31/22 2:08	result_remove-water_d24May2022_T0.2_r2	Medium	Perfect
5/31/22 2:14	result_random_walk_d24May2022_T0.2_r0	Medium	Perfect
5/31/22 2:15	result_random_walk_d24May2022_T0.2_r1	Medium	Perfect
5/31/22 2:15	result_random_walk_d24May2022_T0.2_r2	Medium	Perfect
5/31/22 2:16	result_protein-render_d24May2022_T0.2_r0	Hard	Is far from correct
5/31/22 2:17	result_protein-render_d24May2022_T0.2_r1	Hard	Is far from correct
5/31/22 2:17	result_protein-render_d24May2022_T0.2_r2	Hard	Is far from correct
5/31/22 9:07	result_alignment_d24May2022_T0.2_r0	Easy	Perfect
5/31/22 9:08	result_alignment_d24May2022_T0.2_r1	Easy	Perfect
5/31/22 9:24	result_alignment_d24May2022_T0.2_r2	Easy	Perfect
5/31/22 9:45	result_gaussian_input_emin_d24May2022_T0.2_r0	Hard	Does not run but is almost correct
5/31/22 9:48	result_gaussian_input_emin_d24May2022_T0.2_r1	Hard	Does not run but is almost correct	gives `Error: segmentation violation`
5/31/22 9:49	result_alignment_d24May2022_T0.2_r0	Easy	Perfect
5/31/22 9:49	result_alignment_d24May2022_T0.2_r1	Easy	Perfect
5/31/22 9:49	result_gaussian_input_emin_d24May2022_T0.2_r2	Hard	Does not run but is almost correct
5/31/22 9:50	result_alignment_d24May2022_T0.2_r2	Easy	Perfect
5/31/22 9:52	result_gaussian_input_emin_d24May2022_T0.2_r0	Medium	Runs and is almost correct
5/31/22 9:53	result_karplusant_d24May2022_T0.2_r0	Easy	Is far from correct	Code runs but incorrect formula for karplus eq
5/31/22 9:53	result_gaussian_input_emin_d24May2022_T0.2_r1	Medium	Runs and is almost correct
5/31/22 9:54	result_gaussian_input_emin_d24May2022_T0.2_r2	Medium	Runs and is almost correct
5/31/22 9:54	result_karplusant_d24May2022_T0.2_r1	Easy	Runs and is almost correct
5/31/22 9:54	result_karplusant_d24May2022_T0.2_r2	Easy	Runs and is almost correct	Incorrect formula
5/31/22 9:57	result_karplusant_d24May2022_T0.2_r0	Medium	Runs and is almost correct
5/31/22 9:57	result_karplusant_d24May2022_T0.2_r1	Medium	Runs and is almost correct
5/31/22 9:58	result_karplusant_d24May2022_T0.2_r2	Medium	Is far from correct
5/31/22 10:00	result_langevin_dynamics_d24May2022_T0.2_r0	Hard	Correct but not perfect
5/31/22 10:01	result_langevin_dynamics_d24May2022_T0.2_r1	Hard	Runs and is almost correct
5/31/22 10:01	result_langevin_dynamics_d24May2022_T0.2_r2	Hard	Runs and is almost correct
5/31/22 10:05	result_mc_harmonic_d24May2022_T0.2_r0	Hard	Correct but not perfect
5/31/22 10:06	result_mc_harmonic_d24May2022_T0.2_r1	Hard	Runs and is almost correct
5/31/22 10:07	result_mc_harmonic_d24May2022_T0.2_r1	Hard	Runs and is almost correct
5/31/22 10:07	result_mc_harmonic_d24May2022_T0.2_r2	Hard	Runs and is almost correct
5/31/22 10:08	result_mc_ising_d24May2022_T0.2_r0	Hard	Is far from correct
5/31/22 10:10	result_mc_ising_d24May2022_T0.2_r1	Hard	Is far from correct
5/31/22 10:11	result_mc_harmonic_d24May2022_T0.2_r2	Hard	Correct but not perfect
5/31/22 10:14	result_nwchem_input_emin_d24May2022_T0.2_r0	Hard	Is far from correct
5/31/22 10:15	result_nwchem_input_emin_d24May2022_T0.2_r1	Hard	Correct but not perfect
5/31/22 10:16	result_nwchem_input_emin_d24May2022_T0.2_r2	Hard	Is far from correct
5/31/22 10:21	result_plot_3d_sin_d24May2022_T0.2_r2	Easy	Runs and is almost correct
5/31/22 10:22	result_plot_3d_sin_d24May2022_T0.2_r1	Easy	Runs and is almost correct
5/31/22 10:23	result_plot_3d_sin_d24May2022_T0.2_r0	Easy	Correct but not perfect
5/31/22 10:25	result_plot_bar_d24May2022_T0.2_r2	Easy	Perfect
5/31/22 10:26	result_plot_bar_d24May2022_T0.2_r1	Easy	Perfect
5/31/22 10:27	result_plot_bar_d24May2022_T0.2_r0	Easy	Perfect
5/31/22 10:28	result_plot_contour_d24May2022_T0.2_r0	Easy	Runs and is almost correct
5/31/22 10:29	result_plot_contour_d24May2022_T0.2_r1	Easy	Runs and is almost correct
5/31/22 10:29	result_plot_contour_d24May2022_T0.2_r0	Easy	Runs and is almost correct
5/31/22 10:31	result_plot_correlation_d24May2022_T0.2_r0	Easy	Perfect
5/31/22 10:31	result_plot_correlation_d24May2022_T0.2_r1	Easy	Runs and is almost correct
5/31/22 10:32	result_plot_correlation_d24May2022_T0.2_r2	Easy	Runs and is almost correct
5/31/22 10:33	result_plot_dual_axis_d24May2022_T0.2_r0	Easy	Runs and is almost correct
5/31/22 10:34	result_plot_dual_axis_d24May2022_T0.2_r1	Easy	Is far from correct
5/31/22 10:34	result_plot_dual_axis_d24May2022_T0.2_r2	Medium	Runs and is almost correct
5/31/22 10:35	result_plot_emoji_d24May2022_T0.2_r0	Medium	Does not run but is almost correct
5/31/22 10:36	result_plot_emoji_d24May2022_T0.2_r1	Medium	Does not run but is almost correct
5/31/22 10:36	result_plot_emoji_d24May2022_T0.2_r2	Medium	Does not run but is almost correct
5/31/22 10:37	result_plot_outside_legend_d24May2022_T0.2_r0	Medium	Perfect
5/31/22 10:38	result_plot_outside_legend_d24May2022_T0.2_r1	Medium	Runs and is almost correct
5/31/22 10:38	result_plot_outside_legend_d24May2022_T0.2_r2	Medium	Is far from correct
5/31/22 10:40	result_plot_pointsize_d24May2022_T0.2_r0	Hard	Is far from correct
5/31/22 10:40	result_plot_pointsize_d24May2022_T0.2_r1	Hard	Is far from correct
5/31/22 10:41	result_plot_pointsize_d24May2022_T0.2_r2	Hard	Is far from correct
5/31/22 10:42	result_plot_sin_d24May2022_T0.2_r0	Easy	Perfect
5/31/22 10:43	result_plot_sin_d24May2022_T0.2_r1	Easy	Correct but not perfect
5/31/22 10:43	result_plot_sin_d24May2022_T0.2_r2	Easy	Perfect
5/31/22 10:45	result_plot_sin_polar_d24May2022_T0.2_r0	Medium	Is far from correct
5/31/22 10:46	result_plot_sin_polar_d24May2022_T0.2_r1	Medium	Correct but not perfect
5/31/22 10:46	result_plot_sin_polar_d24May2022_T0.2_r2	Medium	Correct but not perfect
5/31/22 10:47	result_protein-render_d24May2022_T0.2_r0	Hard	Is far from correct
5/31/22 10:48	result_protein-render_d24May2022_T0.2_r1	Hard	Does not run but is almost correct
5/31/22 10:49	result_protein-render_d24May2022_T0.2_r2	Hard	Is far from correct
5/31/22 10:51	result_pyscf_energy_d24May2022_T0.2_r1	Medium	Correct but not perfect
5/31/22 10:51	result_pyscf_energy_d24May2022_T0.2_r0	Medium	Correct but not perfect
5/31/22 10:52	result_pyscf_energy_d24May2022_T0.2_r2	Medium	Runs and is almost correct
5/31/22 10:54	result_random_walk_d24May2022_T0.2_r0	Medium	Runs and is almost correct
5/31/22 10:54	result_random_walk_d24May2022_T0.2_r1	Easy	Correct but not perfect
5/31/22 10:55	result_random_walk_d24May2022_T0.2_r2	Medium	Correct but not perfect
5/31/22 10:57	result_remove-water_d24May2022_T0.2_r0	Hard	Runs and is almost correct
5/31/22 10:58	result_remove-water_d24May2022_T0.2_r1	Hard	Is far from correct
5/31/22 10:58	result_remove-water_d24May2022_T0.2_r2	Hard	Is far from correct
5/31/22 11:00	result_sasa_d24May2022_T0.2_r0	Medium	Runs and is almost correct
5/31/22 11:00	result_sasa_d24May2022_T0.2_r1	Medium	Perfect
5/31/22 11:01	result_sasa_d24May2022_T0.2_r2	Medium	Runs and is almost correct
5/31/22 11:02	result_velocity_verlet_integration_d24May2022_T0.2_r0	Easy	Runs and is almost correct
5/31/22 11:03	result_velocity_verlet_integration_d24May2022_T0.2_r1	Medium	Runs and is almost correct
5/31/22 11:03	result_langevin_dynamics_d24May2022_T0.2_r0	Hard	Correct but not perfect
5/31/22 11:04	result_velocity_verlet_integration_d24May2022_T0.2_r2	Medium	Correct but not perfect
5/31/22 11:07	result_alignment_d24May2022_T0.2_r0	Hard	Correct but not perfect
5/31/22 11:08	result_alignment_d24May2022_T0.2_r1	Hard	Correct but not perfect
5/31/22 11:08	result_alignment_d24May2022_T0.2_r2	Hard	Correct but not perfect
5/31/22 11:11	result_gaussian_input_emin_d24May2022_T0.2_r0	Medium	Perfect
5/31/22 11:12	result_langevin_dynamics_d24May2022_T0.2_r1	Medium	Is far from correct
5/31/22 11:13	result_gaussian_input_emin_d24May2022_T0.2_r1	Medium	Correct but not perfect
5/31/22 11:13	result_gaussian_input_emin_d24May2022_T0.2_r2	Medium	Perfect
5/31/22 11:15	result_langevin_dynamics_d24May2022_T0.2_r2	Medium	Correct but not perfect
5/31/22 11:16	result_alignment_d24May2022_T0.2_r0	Easy	Perfect
5/31/22 11:17	result_karplusant_d24May2022_T0.2_r0	Easy	Is far from correct
5/31/22 11:17	result_karplusant_d24May2022_T0.2_r1	Medium	Is far from correct
5/31/22 11:17	result_karplusant_d24May2022_T0.2_r2	Medium	Is far from correct
5/31/22 11:20	result_langevin_dynamics_d24May2022_T0.2_r0	Hard	Runs and is almost correct
5/31/22 11:21	result_langevin_dynamics_d24May2022_T0.2_r1	Hard	Runs and is almost correct
5/31/22 11:21	result_langevin_dynamics_d24May2022_T0.2_r2	Hard	Runs and is almost correct
5/31/22 11:25	result_karplusant_d24May2022_T0.2_r2	Easy	Perfect
5/31/22 11:27	result_mc_harmonic_d24May2022_T0.2_r0	Medium	Perfect
5/31/22 11:28	result_mc_ising_d24May2022_T0.2_r0	Medium	Perfect
5/31/22 11:29	result_mc_harmonic_d24May2022_T0.2_r1	Medium	Perfect	Different coding style but totally correct (comparing to response 0)
5/31/22 11:31	result_mc_harmonic_d24May2022_T0.2_r1	Medium	Runs and is almost correct	Resubmit.
5/31/22 11:32	result_mc_harmonic_d24May2022_T0.2_r2	Medium	Runs and is almost correct	Should be uniform distribution instead of normal
5/31/22 11:37	result_mc_ising_d24May2022_T0.2_r0	Hard	Runs and is almost correct
5/31/22 11:37	result_mc_ising_d24May2022_T0.2_r1	Hard	Perfect
5/31/22 11:38	result_mc_ising_d24May2022_T0.2_r2	Hard	Perfect
5/31/22 11:41	result_nwchem_input_emin_d24May2022_T0.2_r0	Easy	Correct but not perfect
5/31/22 11:42	result_nwchem_input_emin_d24May2022_T0.2_r1	Easy	Correct but not perfect
5/31/22 11:42	result_nwchem_input_emin_d24May2022_T0.2_r2	Easy	Correct but not perfect
5/31/22 11:44	result_plot_3d_sin_d24May2022_T0.2_r0	Easy	Perfect
5/31/22 11:45	result_plot_3d_sin_d24May2022_T0.2_r1	Easy	Runs and is almost correct
5/31/22 11:47	result_plot_3d_sin_d24May2022_T0.2_r2	Easy	Runs and is almost correct
5/31/22 11:47	result_plot_bar_d24May2022_T0.2_r0	Easy	Perfect
5/31/22 11:48	result_plot_bar_d24May2022_T0.2_r1	Easy	Perfect
5/31/22 11:48	result_plot_bar_d24May2022_T0.2_r2	Easy	Correct but not perfect
5/31/22 11:49	result_plot_contour_d24May2022_T0.2_r0	Easy	Perfect
5/31/22 11:50	result_plot_contour_d24May2022_T0.2_r1	Easy	Perfect
5/31/22 11:50	result_plot_contour_d24May2022_T0.2_r2	Easy	Correct but not perfect
5/31/22 11:51	result_plot_correlation_d24May2022_T0.2_r0	Medium	Correct but not perfect
5/31/22 11:52	result_plot_correlation_d24May2022_T0.2_r1	Medium	Correct but not perfect
5/31/22 11:52	result_plot_correlation_d24May2022_T0.2_r2	Medium	Runs and is almost correct
5/31/22 11:53	result_plot_dual_axis_d24May2022_T0.2_r0	Medium	Runs and is almost correct
5/31/22 11:53	result_plot_dual_axis_d24May2022_T0.2_r1	Medium	Is far from correct
5/31/22 11:54	result_plot_dual_axis_d24May2022_T0.2_r2	Medium	Perfect
5/31/22 11:55	result_plot_emoji_d24May2022_T0.2_r0	Medium	Is far from correct
5/31/22 11:55	result_plot_emoji_d24May2022_T0.2_r1	Medium	Does not run but is almost correct
5/31/22 11:55	result_plot_emoji_d24May2022_T0.2_r2	Medium	Does not run but is almost correct
5/31/22 11:56	result_plot_outside_legend_d24May2022_T0.2_r0	Easy	Perfect
5/31/22 11:56	result_plot_outside_legend_d24May2022_T0.2_r1	Easy	Perfect
5/31/22 11:57	result_plot_outside_legend_d24May2022_T0.2_r0	Easy	Runs and is almost correct
5/31/22 11:57	result_plot_outside_legend_d24May2022_T0.2_r2	Easy	Is far from correct
5/31/22 11:58	result_plot_pointsize_d24May2022_T0.2_r0	Medium	Does not run but is almost correct
5/31/22 11:58	result_plot_pointsize_d24May2022_T0.2_r1	Medium	Does not run but is almost correct
5/31/22 11:59	result_plot_pointsize_d24May2022_T0.2_r2	Medium	Does not run but is almost correct
5/31/22 12:00	result_plot_sin_d24May2022_T0.2_r0	Easy	Perfect
5/31/22 12:00	result_plot_sin_d24May2022_T0.2_r1	Easy	Perfect
5/31/22 12:00	result_plot_sin_d24May2022_T0.2_r2	Easy	Perfect
5/31/22 12:01	result_plot_sin_polar_d24May2022_T0.2_r0	Medium	Runs and is almost correct
5/31/22 12:01	result_plot_sin_polar_d24May2022_T0.2_r1	Medium	Runs and is almost correct
5/31/22 12:01	result_plot_sin_polar_d24May2022_T0.2_r2	Medium	Perfect
5/31/22 12:02	result_protein-render_d24May2022_T0.2_r0	Medium	Runs and is almost correct
5/31/22 12:02	result_protein-render_d24May2022_T0.2_r1	Medium	Runs and is almost correct
5/31/22 12:03	result_protein-render_d24May2022_T0.2_r2	Medium	Is far from correct
5/31/22 12:04	result_pyscf_energy_d24May2022_T0.2_r0	Hard	Runs and is almost correct
5/31/22 12:04	result_pyscf_energy_d24May2022_T0.2_r1	Medium	Runs and is almost correct
5/31/22 12:05	result_pyscf_energy_d24May2022_T0.2_r2	Medium	Runs and is almost correct
5/31/22 12:06	result_random_walk_d24May2022_T0.2_r0	Medium	Runs and is almost correct
5/31/22 12:06	result_random_walk_d24May2022_T0.2_r1	Medium	Perfect
5/31/22 12:06	result_random_walk_d24May2022_T0.2_r2	Medium	Perfect
5/31/22 12:09	result_remove-water_d24May2022_T0.2_r0	Medium	Correct but not perfect
5/31/22 12:09	result_remove-water_d24May2022_T0.2_r1	Medium	Perfect
5/31/22 12:09	result_remove-water_d24May2022_T0.2_r2	Medium	Perfect
5/31/22 12:10	result_sasa_d24May2022_T0.2_r0	Medium	Is far from correct
5/31/22 12:10	result_sasa_d24May2022_T0.2_r1	Medium	Is far from correct
5/31/22 12:11	result_sasa_d24May2022_T0.2_r2	Medium	Is far from correct
5/31/22 12:11	result_velocity_verlet_integration_d24May2022_T0.2_r0	Easy	Perfect
5/31/22 12:11	result_velocity_verlet_integration_d24May2022_T0.2_r1	Easy	Perfect
5/31/22 12:13	result_velocity_verlet_integration_d24May2022_T0.2_r1	Easy	Is far from correct
5/31/22 12:13	result_velocity_verlet_integration_d24May2022_T0.2_r0	Easy	Is far from correct
5/31/22 12:14	result_velocity_verlet_integration_d24May2022_T0.2_r2	Easy	Correct but not perfect
5/31/22 14:09	result_alignment_d24May2022_T0.2_r0	Easy	Perfect	correctly uses the mdtraj superpose function
5/31/22 14:09	result_alignment_d24May2022_T0.2_r1	Easy	Perfect	correctly uses the mdtraj superpose function
5/31/22 14:11	result_alignment_d24May2022_T0.2_r2	Easy	Perfect	correctly uses mdtraj's superpose function
5/31/22 14:19	result_gaussian_input_emin_d24May2022_T0.2_r0	Easy	Perfect	gaussian runs with no errors using the result as input
5/31/22 14:22	result_gaussian_input_emin_d24May2022_T0.2_r1	Easy	Perfect	Gaussian is able to run the input
5/31/22 14:36	result_gaussian_input_emin_d24May2022_T0.2_r2	Easy	Runs and is almost correct	in this response the Opt keyword is added and an optimization job is performed as well
5/31/22 17:03	result_karplusant_d24May2022_T0.2_r0	Medium	Perfect	for the case when m=1, langevin equation is correct
5/31/22 18:15	result_mc_harmonic_d24May2022_T0.2_r0	Hard	Runs and is almost correct
5/31/22 18:16	result_mc_harmonic_d24May2022_T0.2_r1	Medium	Perfect
5/31/22 18:20	result_mc_harmonic_d24May2022_T0.2_r2	Medium	Runs and is almost correct
5/31/22 18:31	result_mc_ising_d24May2022_T0.2_r0	Hard	Runs and is almost correct
5/31/22 18:49	result_nwchem_input_emin_d24May2022_T0.2_r0	Medium	Perfect
5/31/22 18:52	result_nwchem_input_emin_d24May2022_T0.2_r1	Medium	Does not run but is almost correct
5/31/22 18:53	result_nwchem_input_emin_d24May2022_T0.2_r2	Medium	Perfect
5/31/22 18:56	result_plot_bar_d24May2022_T0.2_r0	Easy	Perfect
5/31/22 18:57	result_plot_bar_d24May2022_T0.2_r1	Easy	Perfect
5/31/22 18:57	result_plot_bar_d24May2022_T0.2_r2	Easy	Runs and is almost correct
5/31/22 19:01	result_plot_contour_d24May2022_T0.2_r0	Medium	Runs and is almost correct
5/31/22 19:02	result_plot_contour_d24May2022_T0.2_r1	Medium	Runs and is almost correct
5/31/22 19:02	result_plot_contour_d24May2022_T0.2_r2	Medium	Runs and is almost correct
5/31/22 20:49	result_plot_3d_sin_d24May2022_T0.2_r0	Medium	Correct but not perfect
5/31/22 20:56	result_plot_3d_sin_d24May2022_T0.2_r1	Medium	Runs and is almost correct
5/31/22 20:58	result_plot_3d_sin_d24May2022_T0.2_r2	Medium	Runs and is almost correct
5/31/22 21:00	result_plot_correlation_d24May2022_T0.2_r0	Medium	Perfect
5/31/22 21:00	result_plot_correlation_d24May2022_T0.2_r1	Medium	Is far from correct
5/31/22 21:00	result_plot_correlation_d24May2022_T0.2_r2	Medium	Is far from correct
5/31/22 21:05	result_plot_dual_axis_d24May2022_T0.2_r0	Medium	Runs and is almost correct	No secondary axis
5/31/22 21:07	result_plot_dual_axis_d24May2022_T0.2_r1	Medium	Runs and is almost correct	no x=y plot
5/31/22 21:07	result_plot_dual_axis_d24May2022_T0.2_r2	Medium	Perfect
5/31/22 21:27	result_plot_emoji_d24May2022_T0.2_r0	Hard	Does not run but is almost correct
5/31/22 21:30	result_plot_emoji_d24May2022_T0.2_r1	Medium	Does not run but is almost correct
5/31/22 21:32	result_plot_emoji_d24May2022_T0.2_r2	Medium	Does not run but is almost correct
5/31/22 21:34	result_plot_outside_legend_d24May2022_T0.2_r0	Medium	Perfect
5/31/22 21:35	result_plot_outside_legend_d24May2022_T0.2_r1	Medium	Perfect
5/31/22 21:36	result_plot_outside_legend_d24May2022_T0.2_r2	Medium	Runs and is almost correct
5/31/22 21:39	result_plot_pointsize_d24May2022_T0.2_r0	Hard	Is far from correct
5/31/22 21:40	result_plot_pointsize_d24May2022_T0.2_r1	Hard	Does not run but is almost correct
5/31/22 21:42	result_plot_pointsize_d24May2022_T0.2_r2	Hard	Does not run but is almost correct
5/31/22 21:43	result_plot_sin_d24May2022_T0.2_r0	Easy	Perfect
5/31/22 21:44	result_plot_sin_d24May2022_T0.2_r1	Easy	Perfect
5/31/22 21:44	result_plot_sin_d24May2022_T0.2_r2	Easy	Perfect
5/31/22 21:47	result_plot_sin_polar_d24May2022_T0.2_r0	Easy	Correct but not perfect
5/31/22 21:48	result_plot_sin_polar_d24May2022_T0.2_r1	Easy	Correct but not perfect
5/31/22 21:49	result_plot_sin_polar_d24May2022_T0.2_r2	Easy	Perfect
5/31/22 21:52	result_protein-render_d24May2022_T0.2_r0	Medium	Is far from correct
5/31/22 21:54	result_protein-render_d24May2022_T0.2_r1	Medium	Does not run but is almost correct
5/31/22 21:54	result_protein-render_d24May2022_T0.2_r2	Medium	Is far from correct
5/31/22 22:08	result_pyscf_energy_d24May2022_T0.2_r0	Medium	Correct but not perfect
5/31/22 22:07	result_pyscf_energy_d24May2022_T0.2_r1	Medium	Correct but not perfect
5/31/22 22:06	result_pyscf_energy_d24May2022_T0.2_r2	Medium	Correct but not perfect
5/31/22 22:10	result_random_walk_d24May2022_T0.2_r0	Medium	Perfect
5/31/22 22:11	result_random_walk_d24May2022_T0.2_r1	Medium	Perfect
5/31/22 22:11	result_random_walk_d24May2022_T0.2_r2	Medium	Perfect
5/31/22 22:16	result_remove-water_d24May2022_T0.2_r0	Medium	Perfect
5/31/22 22:18	result_remove-water_d24May2022_T0.2_r1	Medium	Perfect
5/31/22 22:20	result_sasa_d24May2022_T0.2_r0	Medium	Runs and is almost correct
5/31/22 22:21	result_random_walk_d24May2022_T0.2_r2	Medium	Perfect
5/31/22 22:21	result_sasa_d24May2022_T0.2_r1	Medium	Perfect
5/31/22 22:22	result_sasa_d24May2022_T0.2_r2	Medium	Runs and is almost correct
5/31/22 22:27	result_velocity_verlet_integration_d24May2022_T0.2_r0	Medium	Runs and is almost correct
5/31/22 22:34	result_velocity_verlet_integration_d24May2022_T0.2_r1	Medium	Runs and is almost correct
5/31/22 22:35	result_velocity_verlet_integration_d24May2022_T0.2_r2	Medium	Perfect
6/1/22 15:57	result_alignment_d24May2022_T0.2_r0	Medium	Perfect
6/1/22 16:00	result_alignment_d24May2022_T0.2_r1	Medium	Perfect
6/1/22 16:00	result_alignment_d24May2022_T0.2_r2	Medium	Perfect
6/1/22 21:46	result_nwchem_input_emin_d24May2022_T0.2_r0	Easy	Runs and is almost correct	input inlcudes not relevant dft b3lyp line which would perform dft
6/1/22 21:47	result_nwchem_input_emin_d24May2022_T0.2_r1	Easy	Perfect
6/1/22 21:47	result_nwchem_input_emin_d24May2022_T0.2_r2	Easy	Runs and is almost correct	input generated again includes dft line
6/1/22 22:00	result_plot_3d_sin_d24May2022_T0.2_r0	Easy	Runs and is almost correct	code saves generated figure with descriptive name but does not plot sin(x) but sin(x) * cos(y)
6/1/22 22:02	result_plot_3d_sin_d24May2022_T0.2_r1	Easy	Is far from correct	runs but code is not correct
6/1/22 22:03	result_plot_3d_sin_d24May2022_T0.2_r2	Easy	Is far from correct	code runs but it's not correct
6/1/22 22:07	result_plot_bar_d24May2022_T0.2_r0	Easy	Perfect
6/1/22 22:08	result_plot_bar_d24May2022_T0.2_r1	Easy	Perfect
6/1/22 22:08	result_plot_bar_d24May2022_T0.2_r2	Easy	Perfect
6/1/22 22:11	result_plot_contour_d24May2022_T0.2_r0	Easy	Correct but not perfect	color bar is added but does not display the color
6/1/22 22:14	result_plot_contour_d24May2022_T0.2_r1	Easy	Correct but not perfect	again colorbar is missing reference to the contourf and does not show color
6/1/22 22:15	result_plot_contour_d24May2022_T0.2_r2	Easy	Correct but not perfect	same issue as in other responses
6/1/22 22:17	result_plot_correlation_d24May2022_T0.2_r0	Medium	Perfect
6/1/22 22:19	result_plot_correlation_d24May2022_T0.2_r1	Medium	Perfect
6/1/22 22:20	result_plot_correlation_d24May2022_T0.2_r2	Medium	Correct but not perfect	r2 coefficient is not on top left
6/1/22 22:23	result_plot_dual_axis_d24May2022_T0.2_r0	Medium	Runs and is almost correct	no dual axis is produced
6/1/22 22:25	result_plot_dual_axis_d24May2022_T0.2_r1	Medium	Correct but not perfect	dual axis is produced but only sin(x) is plotted
6/1/22 22:26	result_plot_dual_axis_d24May2022_T0.2_r2	Medium	Perfect
6/1/22 22:28	result_plot_emoji_d24May2022_T0.2_r0	Easy	Correct but not perfect	trips up on unrecognized emoji marker
6/1/22 22:29	result_plot_emoji_d24May2022_T0.2_r1	Easy	Correct but not perfect	same as response 0
6/1/22 22:29	result_plot_emoji_d24May2022_T0.2_r2	Easy	Correct but not perfect	same as response 0
6/1/22 22:32	result_plot_outside_legend_d24May2022_T0.2_r0	Medium	Perfect
6/1/22 22:32	result_plot_outside_legend_d24May2022_T0.2_r1	Medium	Perfect
6/1/22 22:33	result_plot_outside_legend_d24May2022_T0.2_r2	Medium	Correct but not perfect	label is not outside
6/1/22 22:51	result_plot_pointsize_d24May2022_T0.2_r0	Medium	Is far from correct	error on orientation argument
6/1/22 22:52	result_plot_pointsize_d24May2022_T0.2_r1	Medium	Is far from correct
6/1/22 22:53	result_plot_pointsize_d24May2022_T0.2_r2	Medium	Is far from correct	nonexistent arguments are used
6/1/22 22:54	result_plot_sin_d24May2022_T0.2_r0	Easy	Perfect
6/1/22 23:01	result_plot_sin_d24May2022_T0.2_r1	Easy	Perfect
6/1/22 23:01	result_plot_sin_d24May2022_T0.2_r2	Easy	Perfect
6/1/22 23:23	result_plot_sin_polar_d24May2022_T0.2_r0	Easy	Runs and is almost correct	multiple instances of plotting using cartesian coordinates are also included
6/1/22 23:24	result_plot_sin_polar_d24May2022_T0.2_r1	Easy	Correct but not perfect
6/1/22 23:25	result_plot_sin_polar_d24May2022_T0.2_r2	Easy	Perfect
6/1/22 23:32	result_protein-render_d24May2022_T0.2_r0	Medium	Is far from correct
6/1/22 23:39	result_protein-render_d24May2022_T0.2_r1	Medium	Does not run but is almost correct	url for pdb is not fully correct, several representations are added to view object but that was not prompted
6/1/22 23:46	result_protein-render_d24May2022_T0.2_r2	Medium	Does not run but is almost correct	multiple responses in one
6/1/22 23:52	result_pyscf_energy_d24May2022_T0.2_r0	Medium	Perfect
6/1/22 23:53	result_pyscf_energy_d24May2022_T0.2_r1	Medium	Perfect
6/1/22 23:54	result_pyscf_energy_d24May2022_T0.2_r2	Medium	Correct but not perfect	redundant return ground_energy statement
6/2/22 10:20	result_plot_3d_sin_d24May2022_T0.2_r0	Medium	Does not run but is almost correct	I had to add "from mpl_toolkits.mplot3d import Axes3D". After that it ran fine.
6/2/22 10:22	result_plot_3d_sin_d24May2022_T0.2_r1	Medium	Does not run but is almost correct	I had to add "from mpl_toolkits.mplot3d import Axes3D". After that it ran.
6/2/22 10:24	result_plot_3d_sin_d24May2022_T0.2_r2	Medium	Does not run but is almost correct	I added "from mol_toolkits.mplot3d import Axes3D". Then It ran.
6/2/22 12:19	result_velocity_verlet_integration_d24May2022_T0.2_r2	Hard	Perfect
6/2/22 12:20	result_velocity_verlet_integration_d24May2022_T0.2_r1	Hard	Runs and is almost correct
6/2/22 12:21	result_velocity_verlet_integration_d24May2022_T0.2_r0	Hard	Runs and is almost correct
6/2/22 17:46	result_random_walk_d24May2022_T0.2_r0	Medium	Perfect
6/2/22 17:46	result_random_walk_d24May2022_T0.2_r0	Medium	Perfect
6/2/22 17:47	result_random_walk_d24May2022_T0.2_r1	Medium	Perfect
6/2/22 17:49	result_random_walk_d24May2022_T0.2_r2	Medium	Perfect
6/2/22 19:00	result_remove-water_d24May2022_T0.2_r0	Medium	Perfect	it works but could have used remove_solvent() from mdtraj
6/2/22 19:01	result_remove-water_d24May2022_T0.2_r1	Medium	Perfect
6/2/22 19:03	result_remove-water_d24May2022_T0.2_r2	Medium	Perfect
6/2/22 20:19	result_sasa_d24May2022_T0.2_r0	Medium	Perfect
6/2/22 20:25	result_sasa_d24May2022_T0.2_r1	Medium	Perfect
6/2/22 20:27	result_sasa_d24May2022_T0.2_r2	Medium	Runs and is almost correct	missing mode='residue'
6/2/22 20:28	result_sasa_d24May2022_T0.2_r0	Medium	Runs and is almost correct	missing mode='residue'
6/2/22 21:23	result_velocity_verlet_integration_d24May2022_T0.2_r0	Hard	Perfect	missing F(x)*dt^2/2 ?
6/2/22 21:25	result_velocity_verlet_integration_d24May2022_T0.2_r1	Hard	Perfect	same as response 0
6/2/22 21:26	result_velocity_verlet_integration_d24May2022_T0.2_r2	Hard	Perfect
6/2/22 21:36	result_karplusant_d24May2022_T0.2_r0	Easy	Runs and is almost correct
6/2/22 21:37	result_karplusant_d24May2022_T0.2_r1	Easy	Runs and is almost correct
6/2/22 21:37	result_karplusant_d24May2022_T0.2_r2	Easy	Runs and is almost correct
6/2/22 23:35	result_sasa_d24May2022_T0.2_r0	Easy	Runs and is almost correct
6/2/22 23:35	result_sasa_d24May2022_T0.2_r1	Easy	Perfect
6/2/22 23:35	result_sasa_d24May2022_T0.2_r2	Easy	Runs and is almost correct
6/3/22 0:12	result_langevin_dynamics_d24May2022_T0.2_r0	Hard	Is far from correct	missing position and velocity updates
6/3/22 0:14	result_langevin_dynamics_d24May2022_T0.2_r1	Hard	Is far from correct	runs but wrong answer due to missing position and velocity updates
6/3/22 0:14	result_langevin_dynamics_d24May2022_T0.2_r2	Hard	Is far from correct
6/3/22 0:28	result_mc_harmonic_d24May2022_T0.2_r0	Medium	Perfect
6/3/22 0:31	result_mc_harmonic_d24May2022_T0.2_r1	Medium	Perfect
6/3/22 0:32	result_mc_harmonic_d24May2022_T0.2_r2	Medium	Runs and is almost correct
6/3/22 0:49	result_mc_ising_d24May2022_T0.2_r0	Medium	Runs and is almost correct	missing h from energy calculation
6/3/22 0:54	result_mc_ising_d24May2022_T0.2_r1	Medium	Runs and is almost correct
6/3/22 0:55	result_mc_ising_d24May2022_T0.2_r2	Medium	Correct but not perfect
6/3/22 12:49	result_remove-water_d24May2022_T0.2_r2	Medium	Perfect
6/3/22 12:50	result_remove-water_d24May2022_T0.2_r1	Medium	Perfect
6/3/22 12:50	result_remove-water_d24May2022_T0.2_r0	Medium	Perfect
6/3/22 13:19	result_random_walk_d24May2022_T0.2_r0	Medium	Perfect
6/3/22 13:19	result_random_walk_d24May2022_T0.2_r1	Medium	Perfect
6/3/22 13:19	result_random_walk_d24May2022_T0.2_r2	Medium	Perfect
6/3/22 15:22	result_plot_bar_d24May2022_T0.2_r0	Easy	Perfect
6/3/22 15:23	result_plot_bar_d24May2022_T0.2_r1	Easy	Perfect
6/3/22 15:23	result_plot_bar_d24May2022_T0.2_r2	Easy	Perfect
